# Supplementary material for: Use and misuse of temperature normalisation in meta-analyses of thermal responses of biological traits
Source: PeerJ. 2018 Feb 9;6:e4363. doi: 10.7717/peerj.4363 (PMC5808315; doi:10.7717/peerj.4363)
Supplement: Supplemental Information 1 [file peerj-06-4363-s002.csv]

Species	Reference	Trait	B0	B_T_ref	T_h	T_ref	P_pk
Akashiwo sanguinea strain BWA	Boyd et al. (2013)	growth rate	3.1753423152e-07	3.17534007003234e-07	300.308275668879	263.15	4.21902757894719e-06
Akashiwo sanguinea strain GBB	Boyd et al. (2013)	growth rate	4.68563382154e-07	4.6856326334933e-07	302.229173871795	263.15	4.96365306635483e-06
Akashiwo sanguinea strain RMB	Boyd et al. (2013)	growth rate	2.01120708964e-07	2.01120708431116e-07	300.976806690168	263.15	4.28678851053217e-06
Akashiwo sanguinea strain YRB	Boyd et al. (2013)	growth rate	1.12616185456e-06	1.12616185456e-06	304.168563694691	263.15	4.71375309312756e-06
Alexandrium minutum	Cannon (1993)	growth rate	6.78777075594e-13	6.78776985541117e-13	286.476433405871	263.15	3.48128133584201e-06
Alexandrium ostenfeldii clone LF-37	Jensen & Moestrup (1997)	growth rate	4.67724127697e-09	4.67724112980947e-09	293.992188557297	263.15	2.54571131004289e-06
Alexandrium ostenfeldii clone LF-37	Jensen and Moestrup (1997)	growth rate	5.11940006352e-09	5.11939973100555e-09	293.95894993417	263.15	2.50084352384276e-06
Alexandrium tamarense clone GTMP	Watras et al. (1982)	growth rate	9.69443406337e-12	9.69442621197314e-12	283.307325482112	263.15	4.04804795492754e-06
Amphidinium klebsii	Morton et al. (1992)	growth rate	2.21109819124e-10	2.21109819122695e-10	301.654309502562	263.15	4.38112833181876e-06
Amphiprora sp.	Hulburt (1982)	growth rate	2.37672568455e-08	2.37672564706409e-08	302.00790709737	263.15	1.01726847908391e-05
Apedinella radians	Throndsen (1976)	growth rate	4.54834431109e-10	4.54826274910909e-10	284.645649329583	263.15	1.38599469061244e-05
Biceratium furca	Baek et al. (2008)	growth rate	1.40259292699e-14	1.40259292536955e-14	288.693235331649	263.15	5.5726833002577e-06
Ceratium furca	Baek et al. (2008)	growth rate	3.03144236831e-12	3.03144206226582e-12	289.769150688442	263.15	6.04766108957195e-06
Chaetoceros didymus	Hulburt (1982)	growth rate	7.2858847454e-23	7.2858847454e-23	286.520470830997	263.15	1.57321984799187e-05
Chaetoceros gracilis strain NEPCC 645	Thompson (1992)	growth rate	5.40593930552e-08	5.40497680330914e-08	290.969055269712	263.15	1.87063272098845e-05
Chaetoceros gracilis	Thompson et al. (1992)	growth rate	7.46432007051e-08	7.46337963505764e-08	291.622739105731	263.15	1.86132196158497e-05
Chaetoceros lorenzianus clone Bushehr	Hulburt (1982)	growth rate	2.73201590913e-07	2.73201590907761e-07	302.421281256983	263.15	1.94180564356388e-05
Chaetoceros sp.	Thomas (1966)	growth rate	2.87564266245e-11	2.87564120970666e-11	292.353887776424	263.15	4.08934946189164e-05
Chattonella marina	Kahn (1998)	growth rate	4.76728595313e-08	4.76720060998561e-08	296.692872272098	263.15	4.96509151917973e-06
Chlamydomonas alpina	Seaburg et al. (1981)	growth rate	6.26510396868e-08	6.26510396550403e-08	287.640465578718	263.15	1.08329980740448e-05
Chlamydomonas reinhardtii	McCombie (1960)	growth rate	1.83708378533e-10	1.83701349658794e-10	289.97951323315	263.15	8.20100078350986e-07
Chlamydomonas subcaudata	Seaburg et al. (1981)	growth rate	1.24119822604e-06	1.24119822599931e-06	288.322572179029	263.15	1.12556317253233e-05
Chlorella MFD1	James et al. (1989)	growth rate	2.68652707103e-07	2.68514394059385e-07	299.358254584589	263.15	2.13586267418355e-06
Chlorella sorokiniana strain CCAP 211/8K, 7-11-05	Sorokin (1960)	growth rate	2.42773371623e-10	2.42773371338835e-10	305.611553319749	263.15	8.01894290849911e-05
Chlorella sp. strain MFD-1	James et al. (1989)	growth rate	2.10392566287e-07	2.10301343798593e-07	299.855696304545	263.15	1.50626093197225e-06
Chrysochromulina polylepis strain B3	Edvardsen (1992)	growth rate	4.65538794172e-07	4.65538745044914e-07	291.556259361322	263.15	1.00283288525122e-05
Chrysochromulina polylepis strain B4	Edvardsen (1992)	growth rate	5.01981646711e-07	5.0198164217127e-07	292.64133915974	263.15	8.60334734578106e-06
Chrysochromulina polylepis strain K	Edvardsen (1992)	growth rate	2.3267261157e-07	2.32657936050242e-07	292.357669587303	263.15	9.92215812382452e-06
Cochlodinium polykrikoides strain KG8-ND14	Yamatogi (2005)	growth rate	4.17693042217e-08	4.1769254461714e-08	301.624339146306	263.15	6.42953648329714e-06
Conticribra guillardii clone 7-15	Guillard & Ryther (1962)	growth rate	1.43229603047e-07	1.43148640436412e-07	285.181510827819	263.15	1.83323114572661e-05
Conticribra weissflogii strain CCMP1053, SA	Boyd et al. (2013)	growth rate	2.51084629553e-08	2.51084598518351e-08	292.241441995764	263.15	8.41706906772791e-06
Cosmarium beatum SVCK 533	Stamenkovi? et al. (2013)	growth rate	2.61945101012e-10	2.61945003769747e-10	293.24436024426	263.15	4.08553507077161e-06
Cosmarium beatum	Stamenkovi? and Hanelt (2013)	growth rate	2.61945101012e-10	2.61945003769747e-10	293.24436024426	263.15	4.08553507077161e-06
Cosmarium crenatum var. boldtianum strain SVCK 561, ASW Wien #07 141	Stamenkovi? et al. (2013)	growth rate	1.52169679238e-07	1.52169675368375e-07	297.584554499088	263.15	3.55149571438924e-06
Cosmarium crenatum	Stamenkovi? and Hanelt (2013)	growth rate	1.52169679238e-07	1.52169675368375e-07	297.584554499088	263.15	3.55149571438924e-06
Cosmarium meneghinii strain SVCK 59, 1927/Praha Ac. A 231	Stamenkovi? et al. (2013)	growth rate	7.03092856899e-09	7.0309285430002e-09	295.208777972626	263.15	7.83780822315659e-06
Cosmarium meneghinii	Stamenkovi? and Hanelt (2013)	growth rate	7.03092856899e-09	7.0309285430002e-09	295.208777972626	263.15	7.83780822315659e-06
Cosmarium punctulatum #571	Stamenkovi? and Hanelt (2013)	growth rate	1.38566880983e-08	1.38566879175754e-08	295.636401252506	263.15	3.56617885360261e-06
Cosmarium punctulatum var. subpunctulatum strain SVCK 571, ASW Wien #07 136	Stamenkovi? et al. (2013)	growth rate	1.38566880983e-08	1.38566879175754e-08	295.636401252506	263.15	3.56617885360261e-06
Crocosphaera watsonii strain 3A	Boyd et al. (2013)	growth rate	4.02430310429e-08	4.02430310429e-08	305.643157290176	263.15	4.48518072916025e-06
Crocosphaera watsonii strain WH005	Boyd et al. (2013)	growth rate	1.07948720211e-12	1.07948719705234e-12	297.906171705795	263.15	6.06670206788019e-06
Crocosphaera watsonii strain WH84	Boyd et al. (2013)	growth rate	1.65142713104e-17	1.65142713103931e-17	297.051945043695	263.15	5.90036875278506e-06
Cryptomonas marssonii	Butterwick et al. (2005)	growth rate	6.49999230727e-08	6.48212002299043e-08	281.234848902338	263.15	6.47384628886449e-06
Cryptomonas marssonii	Butterwick et al. (2005)	growth rate	5.56272894108e-08	5.54898837458971e-08	281.036517508273	263.15	6.48187192304329e-06
Cryptomonas sp. strain F	Throndsen (1976)	growth rate	2.41469354199e-06	2.41469353981311e-06	298.864374763532	263.15	1.12870275120999e-05
Cylindrotheca closterium	Maddux & Jones (1964)	growth rate	9.80938120138e-09	9.80908268225004e-09	291.27159259738	263.15	6.8677984667989e-06
Dactyliosolen fragilissimus	Ignatiades & Smayda (1970)	growth rate	5.1495379607e-10	5.1493805935175e-10	282.662721917646	263.15	8.69851687175749e-06
Desmodesmus quadricaudatus strain A 119, Greifswald/15	Komï¿½rek & Ruzicka (1969)	growth rate	1.79814733011e-09	1.7980107998043e-09	292.122056872131	263.15	1.42223720235417e-05
Diacronema lutheri strain NEPCC 5	Thompson (1992)	growth rate	5.31706874055e-07	5.31706874055e-07	298.576072270211	263.15	2.52051442364846e-05
Dinobryon divergens	Butterwick et al. (2005)	growth rate	3.10381542692e-07	3.10280628070967e-07	290.13944269348	263.15	5.43293933984488e-06
Dinobryon divergens	Butterwick et al. (2005)	growth rate	3.06637709091e-07	3.06540923011214e-07	290.077788908963	263.15	5.43643209397004e-06
Ditylum brightwellii	Paasche (1968)	growth rate	1.40291286767e-06	1.40291281007074e-06	301.957182370934	263.15	2.07353012808821e-05
Dunaliella sp.	Van Auken & McNulty (1973)	growth rate	1.15737540198e-07	1.15737540198e-07	308.085481822512	263.15	8.58417924092357e-06
Emiliania huxleyi strain B92/21	Conte et al. (1998)	growth rate	1.03462940125e-06	1.03462913974676e-06	297.445786240261	263.15	1.09885280443508e-05
Emiliania huxleyi strain G1779Ga	Conte et al. (1998)	growth rate	2.5078532689e-07	2.50765802846216e-07	294.303738825028	263.15	1.31791515154683e-05
Emiliania huxleyi strain S. Africa	Conte et al. (1998)	growth rate	1.32730421894e-07	1.32730366204739e-07	298.373701470316	263.15	1.02504823703486e-05
Emiliania huxleyi strain Van556	Conte et al. (1998)	growth rate	4.15442355973e-06	4.15442355973e-06	297.517674693521	263.15	9.64748067284528e-06
Eutreptiella gymnastica	Throndsen (1976)	growth rate	1.93261796219e-06	1.93261712154858e-06	294.915413274644	263.15	1.81208156821717e-05
Fibrocapsa japonica strain CAWR-19	de Boer et al. (2005)	growth rate	2.63887525967e-07	2.6388752452221e-07	301.386627670699	263.15	3.84319471133314e-06
Fibrocapsa japonica strain CCRuG-C13	de Boer et al. (2005)	growth rate	2.64812368135e-08	2.64753636579917e-08	291.998434770538	263.15	4.4946213124158e-06
Fibrocapsa japonica strain CS-332	de Boer et al. (2005)	growth rate	4.79285912189e-09	4.79285828854421e-09	295.569683892267	263.15	4.41723361028566e-06
Gephyrocapsa oceanica strain AB1, CAWPOT	Conte et al. (1998)	growth rate	3.49499311369e-07	3.4949882678955e-07	299.21708193032	263.15	1.10067573307509e-05
Gephyrocapsa oceanica var. typica strain A4725	Bollmann et al. (2010)	growth rate	8.59175921634e-08	8.59174133481597e-08	300.026315373314	263.15	1.46018974258127e-05
Gephyrocapsa oceanica var. typica strain A4727	Bollmann et al. (2010)	growth rate	5.98737561164e-08	5.98734554049455e-08	299.121089658992	263.15	1.44849033799355e-05
Gymnodinium catenatum strain GCCV-10	Band-Schmidt (2004)	growth rate	1.21798025902e-07	1.21797555578193e-07	300.395632302527	263.15	2.31086309208322e-06
Gymnodinium isolate 582 (probably G. simplex)	Thomas (1966)	growth rate	8.46418311777e-08	8.46418278423969e-08	299.956458539621	263.15	1.32949473116514e-05
Gymnodinium sp. isolate 581 (probably G. simplex)	Thomas (1966)	growth rate	1.11067199525e-07	1.1106714558768e-07	301.351454731893	263.15	8.91206538101611e-06
Gyrodinium uncatenum strain GYRO	Anderson (1985)	growth rate	7.27359911763e-09	7.27283876471084e-09	294.038257471614	263.15	5.24203013249992e-06
Heterocapsa rotundata	Throndsen (1976)	growth rate	1.68006915877e-06	1.6800691583533e-06	296.589708835119	263.15	1.82407092467747e-05
Heteromastix pyriformis	Throndsen (1976)	growth rate	1.6703304941e-06	1.67033049409953e-06	295.802326975461	263.15	1.85767175924157e-05
Karenia brevis strain APA	McKay et al. (2006)	growth rate	1.38123230025e-09	1.38123224197833e-09	296.187045541766	263.15	2.5224488359129e-06
Leonella granifera strain GeoB*39	Meier et al. (2004)	growth rate	7.65159027106e-13	7.65159025174147e-13	294.665865095545	263.15	4.51426515980619e-06
Leonella granifera	Meier et al. (2004)	growth rate	1.34398923764e-11	1.34398923187037e-11	296.192236652016	263.15	4.77830884239833e-06
Leptocylindrus danicus	Hulburt (1982)	growth rate	2.01760185434e-09	2.01760185247689e-09	299.356089806859	263.15	1.9898997595072e-05
Mastigocladus laminosus strain NZ-86-m	Miyamoto et al. (1979)	growth rate	1.50119365882e-07	1.50119365881987e-07	324.570452552874	263.15	8.20215489268378e-06
Men. 5 (Diatom)	Hulburt (1982)	growth rate	2.20028112938e-08	2.20000842522723e-08	293.629026856974	263.15	1.74702642945473e-05
Microcystis aeruginosa strain NRC-1	Krï¿½ger & Eloff (1978)	growth rate	3.51718371901e-12	3.51718228532643e-12	292.366375206381	263.15	3.06858761529315e-06
Odontella mobiliensis	Hulburt (1982)	growth rate	4.58642635801e-09	4.58642617412913e-09	298.684120097736	263.15	1.61458029613744e-05
Olisthodiscus luteus clone OLMS	Tomas (1978)	growth rate	3.03509360726e-07	3.01781416866957e-07	290.530404939701	263.15	9.72900770128159e-06
Olisthodiscus luteus	Throndsen (1976)	growth rate	5.50766024112e-08	5.5068571370021e-08	284.877219925779	263.15	9.81025559761947e-06
Peridinium sp. strain 1	Barker (1935)	growth rate	1.84882063247e-07	1.84882035866577e-07	294.173428097506	263.15	7.07368525436391e-06
Peridinium sp.	Barker (1935)	growth rate	1.70694897778e-07	1.70694863986878e-07	294.02692280245	263.15	7.05904012430961e-06
Pernambugia tuberosa strain GeoB*74	Meier et al. (2004)	growth rate	1.82333256565e-08	1.82333016515376e-08	297.44697333205	263.15	3.8384120398345e-06
Phaeodactylum tricornutum clone Pet Pd	Fawley (1984)	growth rate	2.17431024369e-06	2.17431024368088e-06	299.466312381951	263.15	1.71240913906841e-05
Phaeodactylum tricornutum	Ryther (1954)	growth rate	7.16868568042e-07	7.16840866586893e-07	292.635195266395	263.15	3.94492680276993e-06
Planktothrix agardhii	van Liere (1979)	growth rate	5.38751862989e-07	5.38751862989e-07	308.565587871642	263.15	8.50361265835978e-06
Pleurochrysis carterae	Blankley & Lewin (1976)	growth rate	1.11550216725e-07	1.11550215305516e-07	296.622461813319	263.15	3.78296361686156e-06
Proboscia inermis	Boyd et al. (2013)	growth rate	1.56761508741e-06	1.56761508741e-06	279.598496455254	263.15	3.77598986323795e-06
Prochlorococcus marinus eMED4	Johnson et al. (2006)	growth rate	6.77259736249e-08	6.77259733382531e-08	298.939986379085	263.15	5.47242186332609e-06
Prochlorococcus marinus strain MIT9215 (clade 1)	Johnson (2006)	growth rate	6.98584015432e-10	6.98580038380374e-10	295.930230364173	263.15	5.4019012322632e-06
Prochlorococcus marinus strain MIT9215 (clade 1)	Johnson et al. (2006)	growth rate	8.85224138127e-10	8.85218154352237e-10	296.036229166398	263.15	5.41729634053026e-06
Prochlorococcus marinus strain MIT9312 (clade 1)	Johnson (2006)	growth rate	9.67475231992e-08	9.67475231992e-08	301.310638653455	263.15	7.21935649516796e-06
Prochlorococcus marinus strain MIT9312 (clade 1)	Johnson et al. (2006)	growth rate	9.81089021799e-08	9.81089021799e-08	301.303313797259	263.15	7.2347477312646e-06
Prochlorococcus marinus strain MIT9313	Zinser et al. (2007)	growth rate	1.19586674564e-07	1.19586674563995e-07	302.713981543701	263.15	5.35914902857007e-06
Prochlorococcus marinus strain MIT9515 (clade 2)	Johnson (2006)	growth rate	6.77982324266e-08	6.7798232108507e-08	298.932974977556	263.15	5.49866515080049e-06
Prochlorococcus marinus strain NATL2A	Zinser et al. (2007)	growth rate	7.17927231018e-08	7.17927225395641e-08	299.048069593069	263.15	5.53388841697852e-06
Prorocentrum gracile	Barker (1935)	growth rate	1.74200363936e-08	1.74200363936e-08	293.115795003979	263.15	8.99439658643217e-06
Prorocentrum minimum	Grzebyk & Berland (1996)	growth rate	5.50287568254e-07	5.50287568253037e-07	301.405919474122	263.15	8.51161054892503e-06
Prorocentrum minimum	Grzebyk and Berland (1996)	growth rate	5.44143173649e-07	5.4414317364789e-07	301.384546333237	263.15	8.50519376303976e-06
Pseudo-nitzschia turgiduloides	Fiala & Oriol (1990)	growth rate	8.12344573385e-08	8.12309846897432e-08	277.276546138796	263.15	5.72956290376384e-06
Pseudopedinella pyriformis	Throndsen (1976)	growth rate	8.19987980196e-07	8.19987600190223e-07	290.577211640031	263.15	1.40423080115659e-05
Pyrodinium bahamense var. compressum	Usup et al. (1994)	growth rate	1.57126104075e-07	1.57126104074988e-07	306.716801444587	263.15	3.08230915291042e-06
Pyrodinium bahamense var. compressum strain PbSA01	Usup et al. (1994)	growth rate	1.86183172828e-07	1.8618317282799e-07	306.774596226957	263.15	3.05794080814163e-06
Rhizosolenia fragilissimus	Ignatiades & Smayda (1970)	growth rate	5.1495379607e-10	5.1493805935175e-10	282.662721917646	263.15	8.69851687175749e-06
Rhizosolenia setigera	Hulburt (1982)	growth rate	1.00833336014e-06	1.00833335057916e-06	288.297858411055	263.15	6.49497642686755e-06
Rhizosolenia setigera	Hulburt (1982)	growth rate	5.76286413415e-11	5.76286079548452e-11	289.619098214213	263.15	1.41999014832611e-05
Scrippsiella trochoidea strain ScrpMxB	Binder & Anderson (1987)	growth rate	2.07609708656e-06	2.07609708656e-06	295.669200092048	263.15	5.59451053633826e-06
Skeletonema marinoionohrnii complex	Kaeriyama et al. (2011)	growth rate	3.13983367592e-06	3.11414929130724e-06	299.175764879034	263.15	1.8568050969335e-05
Skeletonema menzelii	Kaeriyama et al. (2011)	growth rate	3.36434519783e-07	3.36403202595164e-07	298.030847873952	263.15	2.36137720187888e-05
Skeletonema tropicum clone fall	Hulburt (1982)	growth rate	7.45605267182e-19	7.45605267181967e-19	287.262071749563	263.15	1.6614895098396e-05
Skeletonema tropicum	Kaeriyama et al. (2011)	growth rate	3.74727776525e-07	3.74450614887167e-07	297.378146049402	263.15	1.63534616878868e-05
Synechococcus sp. strain UV-005, PCC 6311	Krï¿½ger & Eloff (1978)	growth rate	1.28120552657e-13	1.28120548095856e-13	289.271061329105	263.15	3.59345149636474e-06
Thalassiosira pseudonana strain CCMP1011, STX97	Boyd et al. (2013)	growth rate	5.59143005945e-07	5.59143005944994e-07	299.544600741238	263.15	1.37492702586698e-05
Thalassiosira pseudonana strain CCMP1012, SWAN1	Boyd et al. (2013)	growth rate	1.11354341229e-07	1.11354341222844e-07	298.169420799515	263.15	1.71760523125882e-05
Thalassiosira pseudonana strain CCMP1013, W	Boyd et al. (2013)	growth rate	1.81329637589e-07	1.81329637589e-07	302.657067867333	263.15	2.23890649308035e-05
Thalassiosira pseudonana strain CCMP1014, FCRG66	Boyd et al. (2013)	growth rate	1.14281871244e-06	1.14281871244e-06	303.810143045113	263.15	1.90359449229308e-05
Thalassiosira pseudonana strain CCMP1015, ARC5	Boyd et al. (2013)	growth rate	1.34463326761e-06	1.34463326761e-06	304.114509128099	263.15	1.83244219847311e-05
Thalassiosira pseudonana	Thompson et al. (1992)	growth rate	5.78060940611e-07	5.77990385479581e-07	298.463196474093	263.15	2.09368990253683e-05
Thalassiosira rotula strain CCAP1085_21	Boyd et al. (2013)	growth rate	2.40296608571e-07	2.39733426892236e-07	286.733428502222	263.15	8.97839049004541e-06
Thalassiosira rotula strain CCMP3096	Boyd et al. (2013)	growth rate	4.33080482348e-07	4.29787251949709e-07	285.456439996183	263.15	8.10412543011917e-06
Thalassiosira rotula strain CCMP3264	Boyd et al. (2013)	growth rate	3.51115691703e-08	3.50725186380663e-08	282.991301696162	263.15	9.27428096010596e-06
Thalassiosira rotula strain JpnTR18	Boyd et al. (2013)	growth rate	4.55503744278e-07	4.48904945528294e-07	282.412378355605	263.15	7.44632670645473e-06
Thalassiosira rotula	Baars (1981)	growth rate	1.38457046719e-08	1.38429502200992e-08	279.745095804081	263.15	1.75082992896932e-05
Trichodesmium erythraeum strain 21_75	Boyd et al. (2013)	growth rate	6.72977234743e-12	6.72977230899152e-12	297.652508523104	263.15	3.10353683980548e-06
Trichodesmium erythraeum strain KO4_20	Boyd et al. (2013)	growth rate	8.18561641617e-11	8.18561639523761e-11	299.07464991121	263.15	3.6246253461463e-06
Trichodesmium radians strain H94	Chappell & Webb (2010)	growth rate	1.30518434955e-16	1.30518434955e-16	298.661417034754	263.15	4.24985206060136e-06
Akashiwo sanguinea strain BWA	Boyd et al. (2013)	growth rate	4.02377057843e-07	4.02376222459953e-07	300.308275631684	265.65	4.21902756205967e-06
Akashiwo sanguinea strain GBB	Boyd et al. (2013)	growth rate	5.76248054553e-07	5.76247613253996e-07	302.229178731125	265.65	4.9636529248314e-06
Akashiwo sanguinea strain RMB	Boyd et al. (2013)	growth rate	2.61946114412e-07	2.61946111366796e-07	300.976807006976	265.65	4.28678852128717e-06
Akashiwo sanguinea strain YRB	Boyd et al. (2013)	growth rate	1.25962323983e-06	1.25962323983e-06	304.168563119255	265.65	4.71375329848367e-06
Alexandrium minutum	Cannon (1993)	growth rate	4.09141381886e-12	4.09141043437922e-12	286.476432804112	265.65	3.48128005480177e-06
Alexandrium ostenfeldii clone LF-37	Jensen & Moestrup (1997)	growth rate	8.74351473881e-09	8.74351344318648e-09	293.992187925113	265.65	2.54571098555049e-06
Alexandrium ostenfeldii clone LF-37	Jensen and Moestrup (1997)	growth rate	9.48691053024e-09	9.48690780696789e-09	293.958950396669	265.65	2.50084353635184e-06
Alexandrium tamarense clone GTMP	Watras et al. (1982)	growth rate	5.53539899695e-11	5.53537033588343e-11	283.30732437994	265.65	4.04804630657529e-06
Amphidinium klebsii	Morton et al. (1992)	growth rate	4.82030907428e-10	4.82030907408863e-10	301.654312716793	265.65	4.38112803607352e-06
Amphiprora sp.	Hulburt (1982)	growth rate	3.88551997701e-08	3.88551974897052e-08	302.007902698523	265.65	1.01726829599306e-05
Apedinella radians	Throndsen (1976)	growth rate	1.68156296483e-09	1.68144525545264e-09	284.645649938096	265.65	1.38599507117716e-05
Biceratium furca	Baek et al. (2008)	growth rate	1.16939779378e-13	1.16939778172227e-13	288.693235355685	265.65	5.5726833376477e-06
Ceratium furca	Baek et al. (2008)	growth rate	1.37927117869e-11	1.37927045346699e-11	289.769151257743	265.65	6.04766129224381e-06
Chaetoceros didymus	Hulburt (1982)	growth rate	7.3291344925e-21	7.3291344925e-21	286.520467762734	265.65	1.57321778115179e-05
Chaetoceros gracilis strain NEPCC 645	Thompson (1992)	growth rate	1.01661003064e-07	1.01618673929193e-07	290.969060573416	265.65	1.87063283077044e-05
Chaetoceros gracilis	Thompson et al. (1992)	growth rate	1.34936368763e-07	1.34895979840072e-07	291.622767715716	265.65	1.86132255589357e-05
Chaetoceros lorenzianus clone Bushehr	Hulburt (1982)	growth rate	3.85570241076e-07	3.85570241031783e-07	302.421281248567	265.65	1.94180552698244e-05
Chaetoceros sp.	Thomas (1966)	growth rate	1.10129400836e-10	1.10129182788656e-10	292.353880286565	265.65	4.08934832239727e-05
Chattonella marina	Kahn (1998)	growth rate	7.43483174869e-08	7.43450114349664e-08	296.692872875449	265.65	4.9650919420362e-06
Chlamydomonas alpina	Seaburg et al. (1981)	growth rate	1.1807934204e-07	1.18079341402454e-07	287.640464634083	265.65	1.08329962902203e-05
Chlamydomonas reinhardtii	McCombie (1960)	growth rate	4.4960837282e-10	4.49559971304334e-10	289.979516573141	265.65	8.2010029906236e-07
Chlamydomonas subcaudata	Seaburg et al. (1981)	growth rate	1.63232498809e-06	1.63232498736802e-06	288.322572720266	265.65	1.12556325060738e-05
Chlorella MFD1	James et al. (1989)	growth rate	3.32145038448e-07	3.3183696322094e-07	299.358238159305	265.65	2.13586279070845e-06
Chlorella sorokiniana strain CCAP 211/8K, 7-11-05	Sorokin (1960)	growth rate	5.99889749616e-10	5.99889746788435e-10	305.611548450422	265.65	8.01894219206165e-05
Chlorella sp. strain MFD-1	James et al. (1989)	growth rate	2.57088496915e-07	2.56886416423043e-07	299.855709525431	265.65	1.50626085896244e-06
Chrysochromulina polylepis strain B3	Edvardsen (1992)	growth rate	6.59271958098e-07	6.59271629766492e-07	291.55625936115	265.65	1.00283288298585e-05
Chrysochromulina polylepis strain B4	Edvardsen (1992)	growth rate	6.838532122e-07	6.83853177329972e-07	292.64133850003	265.65	8.60334677589449e-06
Chrysochromulina polylepis strain K	Edvardsen (1992)	growth rate	3.53588985022e-07	3.53533528174787e-07	292.357668947571	265.65	9.92215725581159e-06
Cochlodinium polykrikoides strain KG8-ND14	Yamatogi (2005)	growth rate	6.36825930289e-08	6.36823854889788e-08	301.624338026106	265.65	6.42953636691952e-06
Conticribra guillardii clone 7-15	Guillard & Ryther (1962)	growth rate	2.77795503581e-07	2.77405370752993e-07	285.181512652422	265.65	1.83323118768899e-05
Conticribra weissflogii strain CCMP1053, SA	Boyd et al. (2013)	growth rate	4.6379062092e-08	4.63790363041522e-08	292.241441353456	265.65	8.41706798154207e-06
Cosmarium beatum SVCK 533	Stamenkovi? et al. (2013)	growth rate	6.71821689029e-10	6.71820719481338e-10	293.244360362887	265.65	4.08553508740536e-06
Cosmarium beatum	Stamenkovi? and Hanelt (2013)	growth rate	6.71821689029e-10	6.71820719481338e-10	293.244360362887	265.65	4.08553508740536e-06
Cosmarium crenatum var. boldtianum strain SVCK 561, ASW Wien #07 141	Stamenkovi? et al. (2013)	growth rate	2.04985182259e-07	2.04985160645223e-07	297.584553497771	265.65	3.55149589301734e-06
Cosmarium crenatum	Stamenkovi? and Hanelt (2013)	growth rate	2.04985182259e-07	2.04985160645223e-07	297.584553497771	265.65	3.55149589301734e-06
Cosmarium meneghinii strain SVCK 59, 1927/Praha Ac. A 231	Stamenkovi? et al. (2013)	growth rate	1.36881169843e-08	1.36881167121181e-08	295.208776700454	265.65	7.83780717753825e-06
Cosmarium meneghinii	Stamenkovi? and Hanelt (2013)	growth rate	1.36881169843e-08	1.36881167121181e-08	295.208776700454	265.65	7.83780717753825e-06
Cosmarium punctulatum #571	Stamenkovi? and Hanelt (2013)	growth rate	2.35489861896e-08	2.35489847355328e-08	295.6364042314	265.65	3.5661788489064e-06
Cosmarium punctulatum var. subpunctulatum strain SVCK 571, ASW Wien #07 136	Stamenkovi? et al. (2013)	growth rate	2.35489861896e-08	2.35489847355328e-08	295.6364042314	265.65	3.5661788489064e-06
Crocosphaera watsonii strain 3A	Boyd et al. (2013)	growth rate	5.67240764652e-08	5.67240764652e-08	305.643157290176	265.65	4.48518072916041e-06
Crocosphaera watsonii strain WH005	Boyd et al. (2013)	growth rate	3.92132070119e-12	3.92132061488549e-12	297.906171705954	265.65	6.06670206924524e-06
Crocosphaera watsonii strain WH84	Boyd et al. (2013)	growth rate	1.50840781303e-16	1.50840781302337e-16	297.051945043695	265.65	5.90036875308149e-06
Cryptomonas marssonii	Butterwick et al. (2005)	growth rate	1.35521966828e-07	1.34642486343281e-07	281.234848473712	265.65	6.47384625299963e-06
Cryptomonas marssonii	Butterwick et al. (2005)	growth rate	1.19347226649e-07	1.18633769445247e-07	281.036516690103	265.65	6.48187079027952e-06
Cryptomonas sp. strain F	Throndsen (1976)	growth rate	2.79140486868e-06	2.79140485570492e-06	298.864374125151	265.65	1.12870271850591e-05
Cylindrotheca closterium	Maddux & Jones (1964)	growth rate	1.97331789661e-08	1.97315241087373e-08	291.27159259738	265.65	6.86779846685683e-06
Dactyliosolen fragilissimus	Ignatiades & Smayda (1970)	growth rate	1.99118807404e-09	1.99093705275976e-09	282.662722267068	265.65	8.69851700290916e-06
Desmodesmus quadricaudatus strain A 119, Greifswald/15	Komï¿½rek & Ruzicka (1969)	growth rate	4.27803709888e-09	4.27723818371669e-09	292.122054569756	265.65	1.42223715046716e-05
Diacronema lutheri strain NEPCC 5	Thompson (1992)	growth rate	7.2885479823e-07	7.2885479823e-07	298.565120533376	265.65	2.52376326061144e-05
Dinobryon divergens	Butterwick et al. (2005)	growth rate	4.44445982149e-07	4.44120480041965e-07	290.139443398194	265.65	5.4329393478774e-06
Dinobryon divergens	Butterwick et al. (2005)	growth rate	4.39981677091e-07	4.39667380057999e-07	290.07778930595	265.65	5.43643211697329e-06
Ditylum brightwellii	Paasche (1968)	growth rate	1.77006151518e-06	1.77006126267843e-06	301.957182050483	265.65	2.07353003751937e-05
Dunaliella sp.	Van Auken & McNulty (1973)	growth rate	1.56533321264e-07	1.56533321264e-07	308.085482249586	265.65	8.58417918293372e-06
Emiliania huxleyi strain B92/21	Conte et al. (1998)	growth rate	1.30507281153e-06	1.30507167180912e-06	297.445786538567	265.65	1.09885282593939e-05
Emiliania huxleyi strain G1779Ga	Conte et al. (1998)	growth rate	3.79336564837e-07	3.79268091374279e-07	294.30374104236	265.65	1.31791528814183e-05
Emiliania huxleyi strain S. Africa	Conte et al. (1998)	growth rate	1.97535532597e-07	1.97535265405259e-07	298.373701065787	265.65	1.02504822603712e-05
Emiliania huxleyi strain Van556	Conte et al. (1998)	growth rate	4.47423230185e-06	4.47423230185e-06	297.517674657016	265.65	9.64748086759005e-06
Eutreptiella gymnastica	Throndsen (1976)	growth rate	2.45062551777e-06	2.45062168456423e-06	294.915413572726	265.65	1.81208156078531e-05
Fibrocapsa japonica strain CAWR-19	de Boer et al. (2005)	growth rate	3.3273529747e-07	3.32735290000111e-07	301.38662757556	265.65	3.84319471630418e-06
Fibrocapsa japonica strain CCRuG-C13	de Boer et al. (2005)	growth rate	4.58277274169e-08	4.58050808242918e-08	291.998427265136	265.65	4.49462125197295e-06
Fibrocapsa japonica strain CS-332	de Boer et al. (2005)	growth rate	9.13601333259e-09	9.13600729356219e-09	295.569684875711	265.65	4.4172341960648e-06
Gephyrocapsa oceanica strain AB1, CAWPOT	Conte et al. (1998)	growth rate	4.79912076619e-07	4.79910169207193e-07	299.217079799949	265.65	1.10067568976623e-05
Gephyrocapsa oceanica var. typica strain A4725	Bollmann et al. (2010)	growth rate	1.34184161801e-07	1.3418340139396e-07	300.026326337236	265.65	1.46018987079557e-05
Gephyrocapsa oceanica var. typica strain A4727	Bollmann et al. (2010)	growth rate	9.71254663729e-08	9.71241989259622e-08	299.12110276575	265.65	1.44849043955288e-05
Gymnodinium isolate 582 (probably G. simplex)	Thomas (1966)	growth rate	1.30987323984e-07	1.30987304900402e-07	299.956458539554	265.65	1.32949473583578e-05
Gymnodinium sp. isolate 581 (probably G. simplex)	Thomas (1966)	growth rate	1.61345324302e-07	1.61345093747924e-07	301.351454731873	265.65	8.91206538311573e-06
Gyrodinium uncatenum strain GYRO	Anderson (1985)	growth rate	1.37550433677e-08	1.37517753515323e-08	294.038256995822	265.65	5.24203022531316e-06
Heterocapsa rotundata	Throndsen (1976)	growth rate	2.11555342769e-06	2.11555342436588e-06	296.589708533743	265.65	1.82407095334801e-05
Heteromastix pyriformis	Throndsen (1976)	growth rate	2.10643462836e-06	2.106434628353e-06	295.802326975461	265.65	1.85767175924154e-05
Karenia brevis strain APA	McKay et al. (2006)	growth rate	2.75947056481e-09	2.75947007701272e-09	296.187044663176	265.65	2.52244848841255e-06
Leonella granifera strain GeoB*39	Meier et al. (2004)	growth rate	3.14763125595e-12	3.14763121058517e-12	294.665861168428	265.65	4.51426443668193e-06
Leonella granifera	Meier et al. (2004)	growth rate	4.16091738443e-11	4.16091729368994e-11	296.19223615864	265.65	4.77830870877446e-06
Leptocylindrus danicus	Hulburt (1982)	growth rate	4.35503109261e-09	4.3550310723155e-09	299.356089806859	265.65	1.98989975954025e-05
Mastigocladus laminosus strain NZ-86-m	Miyamoto et al. (1979)	growth rate	1.87004097109e-07	1.87004097108929e-07	324.570453137572	265.65	8.20215495379683e-06
Men. 5 (Diatom)	Hulburt (1982)	growth rate	4.21882464618e-08	4.21764288009972e-08	293.629059220758	265.65	1.74702708304211e-05
Microcystis aeruginosa strain NRC-1	Krï¿½ger & Eloff (1978)	growth rate	1.30150437092e-11	1.3015022503611e-11	292.366373501551	265.65	3.06858741502645e-06
Odontella mobiliensis	Hulburt (1982)	growth rate	9.24285826548e-09	9.24285683989003e-09	298.684116445697	265.65	1.61458021826136e-05
Olisthodiscus luteus clone OLMS	Tomas (1978)	growth rate	4.52557761662e-07	4.48259781085285e-07	290.530403042133	265.65	9.72900761278246e-06
Olisthodiscus luteus	Throndsen (1976)	growth rate	1.12995316036e-07	1.12946328611143e-07	284.877219925779	265.65	9.81025559761968e-06
Peridinium sp. strain 1	Barker (1935)	growth rate	2.69581672893e-07	2.69581510459054e-07	294.173424063897	265.65	7.07368453569372e-06
Peridinium sp.	Barker (1935)	growth rate	2.51273506506e-07	2.51273308143827e-07	294.026922780074	265.65	7.05904013540972e-06
Pernambugia tuberosa strain GeoB*74	Meier et al. (2004)	growth rate	2.98433180277e-08	2.98431993851466e-08	297.446969812791	265.65	3.83841229182939e-06
Phaeodactylum tricornutum clone Pet Pd	Fawley (1984)	growth rate	2.61276145178e-06	2.61276145169633e-06	299.466313076051	265.65	1.71240919503703e-05
Phaeodactylum tricornutum	Ryther (1954)	growth rate	8.83012847637e-07	8.82924707103707e-07	292.635196046483	265.65	3.94492697855436e-06
Planktothrix agardhii	van Liere (1979)	growth rate	6.54538884969e-07	6.54538884968999e-07	308.565587871642	265.65	8.50361265835991e-06
Pleurochrysis carterae	Blankley & Lewin (1976)	growth rate	1.5642940013e-07	1.56429391063907e-07	296.622462590539	265.65	3.78296384844486e-06
Proboscia inermis	Boyd et al. (2013)	growth rate	1.83383370037e-06	1.83383370037e-06	279.598496518368	265.65	3.7759898094789e-06
Prochlorococcus marinus eMED4	Johnson et al. (2006)	growth rate	1.00036355402e-07	1.0003635347472e-07	298.939986685736	265.65	5.47242184963581e-06
Prochlorococcus marinus strain MIT9215 (clade 1)	Johnson (2006)	growth rate	1.56243012509e-09	1.56240530995643e-09	295.930256898497	265.65	5.40190253769043e-06
Prochlorococcus marinus strain MIT9215 (clade 1)	Johnson et al. (2006)	growth rate	1.93809256543e-09	1.93805665056479e-09	296.036243872752	265.65	5.41729705256702e-06
Prochlorococcus marinus strain MIT9312 (clade 1)	Johnson (2006)	growth rate	1.3712469267e-07	1.3712469267e-07	301.310638945647	265.65	7.21935698381783e-06
Prochlorococcus marinus strain MIT9312 (clade 1)	Johnson et al. (2006)	growth rate	1.3891944602e-07	1.3891944602e-07	301.30331382154	265.65	7.23474775630521e-06
Prochlorococcus marinus strain MIT9313	Zinser et al. (2007)	growth rate	1.6182033597e-07	1.61820335969941e-07	302.713981575693	265.65	5.35914909050183e-06
Prochlorococcus marinus strain MIT9515 (clade 2)	Johnson (2006)	growth rate	1.00192939422e-07	1.00192937298927e-07	298.932973976647	265.65	5.49866471592392e-06
Prochlorococcus marinus strain NATL2A	Zinser et al. (2007)	growth rate	1.05597281235e-07	1.05597277662326e-07	299.048068092315	265.65	5.53388833925056e-06
Prorocentrum gracile	Barker (1935)	growth rate	3.13278823557e-08	3.13278823557e-08	293.115794988109	265.65	8.99439654498074e-06
Prorocentrum minimum	Grzebyk & Berland (1996)	growth rate	6.92184936793e-07	6.92184936783987e-07	301.405908893903	265.65	8.51161117593908e-06
Prorocentrum minimum	Grzebyk and Berland (1996)	growth rate	6.85181149449e-07	6.85181149438707e-07	301.384534635106	265.65	8.50519510256451e-06
Pseudo-nitzschia turgiduloides	Fiala & Oriol (1990)	growth rate	2.02657186828e-07	2.02601644548313e-07	277.276542641789	265.65	5.72956283194294e-06
Pseudopedinella pyriformis	Throndsen (1976)	growth rate	1.14882648457e-06	1.14882420548934e-06	290.577211640031	265.65	1.4042308011566e-05
Pyrodinium bahamense var. compressum	Usup et al. (1994)	growth rate	1.95818099375e-07	1.95818099374893e-07	306.716801839633	265.65	3.08230913073618e-06
Pyrodinium bahamense var. compressum strain PbSA01	Usup et al. (1994)	growth rate	2.29023158977e-07	2.29023158976905e-07	306.7745962348	265.65	3.05794080925589e-06
Rhizosolenia fragilissimus	Ignatiades & Smayda (1970)	growth rate	1.99118807404e-09	1.99093705275976e-09	282.662722267068	265.65	8.69851700290916e-06
Rhizosolenia setigera	Hulburt (1982)	growth rate	1.28276320941e-06	1.28276312015495e-06	288.297858003719	265.65	6.49497684334752e-06
Rhizosolenia setigera	Hulburt (1982)	growth rate	2.1450381354e-10	2.14503268273684e-10	289.619094998164	265.65	1.41999001106885e-05
Scrippsiella trochoidea strain ScrpMxB	Binder & Anderson (1987)	growth rate	2.2768813129e-06	2.2768813129e-06	295.669200689355	265.65	5.59451035716846e-06
Skeletonema marinoionohrnii complex	Kaeriyama et al. (2011)	growth rate	3.8083858254e-06	3.76322791178953e-06	299.17577200968	265.65	1.85680517349289e-05
Skeletonema menzelii	Kaeriyama et al. (2011)	growth rate	5.00597683335e-07	5.00499404471191e-07	298.030851974783	265.65	2.36137749003039e-05
Skeletonema tropicum clone fall	Hulburt (1982)	growth rate	2.36002211002e-17	2.36002211001666e-17	287.262512082693	265.65	1.66153150925631e-05
Skeletonema tropicum	Kaeriyama et al. (2011)	growth rate	5.38819961725e-07	5.38101878573099e-07	297.378146641089	265.65	1.63534627234358e-05
Synechococcus sp. strain UV-005, PCC 6311	Krï¿½ger & Eloff (1978)	growth rate	7.65739006453e-13	7.65738843509378e-13	289.271206951087	265.65	3.59346874068364e-06
Thalassiosira pseudonana strain CCMP1011, STX97	Boyd et al. (2013)	growth rate	7.36091907836e-07	7.36091907835903e-07	299.544600240127	265.65	1.37492703206122e-05
Thalassiosira pseudonana strain CCMP1012, SWAN1	Boyd et al. (2013)	growth rate	1.74212611571e-07	1.74212611507089e-07	298.169420689946	265.65	1.71760535557397e-05
Thalassiosira pseudonana strain CCMP1013, W	Boyd et al. (2013)	growth rate	2.63972254155e-07	2.63972254155e-07	302.657067757058	265.65	2.23890654324988e-05
Thalassiosira pseudonana strain CCMP1014, FCRG66	Boyd et al. (2013)	growth rate	1.41604453904e-06	1.41604453904e-06	303.810142935521	265.65	1.90359449399194e-05
Thalassiosira pseudonana strain CCMP1015, ARC5	Boyd et al. (2013)	growth rate	1.64576434129e-06	1.64576434128999e-06	304.11450907419	265.65	1.83244220795047e-05
Thalassiosira pseudonana	Thompson et al. (1992)	growth rate	8.12593726847e-07	8.12390664486429e-07	298.463220491729	265.65	2.09368988111155e-05
Thalassiosira rotula strain CCAP1085_21	Boyd et al. (2013)	growth rate	3.8999490433e-07	3.88172002758175e-07	286.733428501111	265.65	8.97839048953723e-06
Thalassiosira rotula strain CCMP3096	Boyd et al. (2013)	growth rate	6.61700003416e-07	6.52707601087507e-07	285.456439996183	265.65	8.10412543010005e-06
Thalassiosira rotula strain CCMP3264	Boyd et al. (2013)	growth rate	7.80629316954e-08	7.78470013483275e-08	282.991301992844	265.65	9.27428104343769e-06
Thalassiosira rotula strain JpnTR18	Boyd et al. (2013)	growth rate	7.19584428538e-07	7.01135138427731e-07	282.412378356611	265.65	7.44632670402838e-06
Thalassiosira rotula	Baars (1981)	growth rate	4.55572664547e-08	4.55222567924416e-08	279.745095521823	265.65	1.75082989876277e-05
Trichodesmium erythraeum strain 21_75	Boyd et al. (2013)	growth rate	2.03608949995e-11	2.03608944564873e-11	297.652512787551	265.65	3.10353719142853e-06
Trichodesmium erythraeum strain KO4_20	Boyd et al. (2013)	growth rate	1.99646708264e-10	1.99646705858546e-10	299.074650345079	265.65	3.62462541177653e-06
Trichodesmium radians strain H94	Chappell & Webb (2010)	growth rate	9.30117013604e-16	9.30117013603991e-16	298.661417605778	265.65	4.24985355468586e-06
Akashiwo sanguinea strain BWA	Boyd et al. (2013)	growth rate	5.07642805591e-07	5.07639772531547e-07	300.308275668879	268.15	4.21902757894709e-06
Akashiwo sanguinea strain GBB	Boyd et al. (2013)	growth rate	7.0595158844e-07	7.05949988853147e-07	302.229180166841	268.15	4.96365287728924e-06
Akashiwo sanguinea strain RMB	Boyd et al. (2013)	growth rate	3.3949028335e-07	3.39490266504444e-07	300.976807373363	268.15	4.28678856048378e-06
Akashiwo sanguinea strain YRB	Boyd et al. (2013)	growth rate	1.4059626836e-06	1.40596268359999e-06	304.168563681085	268.15	4.71375310046695e-06
Alexandrium minutum	Cannon (1993)	growth rate	2.38491455091e-11	2.38490266268916e-11	286.476433405881	268.15	3.48128133630383e-06
Alexandrium ostenfeldii clone LF-37	Jensen & Moestrup (1997)	growth rate	1.61553444071e-08	1.61553334536513e-08	293.992188678058	268.15	2.54571130694659e-06
Alexandrium ostenfeldii clone LF-37	Jensen and Moestrup (1997)	growth rate	1.73794055706e-08	1.73793841247947e-08	293.958950150743	268.15	2.50084352961489e-06
Alexandrium tamarense clone GTMP	Watras et al. (1982)	growth rate	3.05961569681e-10	3.05951786150135e-10	283.307322942404	268.15	4.04804587962916e-06
Amphidinium klebsii	Morton et al. (1992)	growth rate	1.03568397472e-09	1.03568397445301e-09	301.654310045928	268.15	4.38112820701609e-06
Amphiprora sp.	Hulburt (1982)	growth rate	6.29418662954e-08	6.29418528825874e-08	302.007904740087	268.15	1.01726846730811e-05
Apedinella radians	Throndsen (1976)	growth rate	6.06714621296e-09	6.06553016474336e-09	284.645649938096	268.15	1.38599507117711e-05
Biceratium furca	Baek et al. (2008)	growth rate	9.37174488787e-13	9.37174405993178e-13	288.693236020736	268.15	5.5726834994938e-06
Ceratium furca	Baek et al. (2008)	growth rate	6.10066552123e-11	6.10064932103647e-11	289.769145804483	268.15	6.04765779253866e-06
Chaetoceros didymus	Hulburt (1982)	growth rate	6.76596780414e-19	6.76596780413979e-19	286.520469087168	268.15	1.57321948878693e-05
Chaetoceros gracilis strain NEPCC 645	Thompson (1992)	growth rate	1.8893955098e-07	1.8875852156892e-07	290.969063827931	268.15	1.87063289867113e-05
Chaetoceros gracilis	Thompson et al. (1992)	growth rate	2.41250511892e-07	2.41081741558776e-07	291.622753527263	268.15	1.86132226951274e-05
Chaetoceros lorenzianus clone Bushehr	Hulburt (1982)	growth rate	5.40671028605e-07	5.40671028246378e-07	302.421277788979	268.15	1.94180603408097e-05
Chaetoceros sp.	Thomas (1966)	growth rate	4.1134505749e-10	4.11341945835496e-10	292.353881565739	268.15	4.08934852131383e-05
Chattonella marina	Kahn (1998)	growth rate	1.14993251997e-07	1.14980764724006e-07	296.692872875449	268.15	4.96509194203634e-06
Chlamydomonas alpina	Seaburg et al. (1981)	growth rate	2.19931429907e-07	2.19931417805017e-07	287.640465452835	268.15	1.08329979708341e-05
Chlamydomonas reinhardtii	McCombie (1960)	growth rate	1.08215983919e-09	1.08183835929249e-09	289.979517467825	268.15	8.20100324543793e-07
Chlamydomonas subcaudata	Seaburg et al. (1981)	growth rate	2.13576702223e-06	2.13576701008708e-06	288.322572738214	268.15	1.12556324816162e-05
Chlorella MFD1	James et al. (1989)	growth rate	4.09023218883e-07	4.08347408043882e-07	299.358247406967	268.15	2.13586272216192e-06
Chlorella sorokiniana strain CCAP 211/8K, 7-11-05	Sorokin (1960)	growth rate	1.4575405412e-09	1.45754051424425e-09	305.611555308694	268.15	8.01894327420225e-05
Chlorella sp. strain MFD-1	James et al. (1989)	growth rate	3.12975513232e-07	3.12534566212433e-07	299.855702617394	268.15	1.50626090186486e-06
Chrysochromulina polylepis strain B3	Edvardsen (1992)	growth rate	9.27589269883e-07	9.27587151909659e-07	291.556259361322	268.15	1.00283288531817e-05
Chrysochromulina polylepis strain B4	Edvardsen (1992)	growth rate	9.26262780065e-07	9.26262522216688e-07	292.64133915974	268.15	8.60334734878095e-06
Chrysochromulina polylepis strain K	Edvardsen (1992)	growth rate	5.331668812e-07	5.32962475687477e-07	292.357669587025	268.15	9.92215812403809e-06
Cochlodinium polykrikoides strain KG8-ND14	Yamatogi (2005)	growth rate	9.63316739507e-08	9.63308310911548e-08	301.624338121338	268.15	6.42953594300292e-06
Conticribra guillardii clone 7-15	Guillard & Ryther (1962)	growth rate	5.32172900537e-07	5.30349492194205e-07	285.18150983749	268.15	1.83323113423867e-05
Conticribra weissflogii strain CCMP1053, SA	Boyd et al. (2013)	growth rate	8.46943673151e-08	8.46941613299445e-08	292.241441995764	268.15	8.41706906772769e-06
Cosmarium beatum SVCK 533	Stamenkovi? et al. (2013)	growth rate	1.69305288657e-09	1.69304362552539e-09	293.244359101186	268.15	4.08553484475359e-06
Cosmarium beatum	Stamenkovi? and Hanelt (2013)	growth rate	1.69305288657e-09	1.69304362552539e-09	293.244359101186	268.15	4.08553484475359e-06
Cosmarium crenatum var. boldtianum strain SVCK 561, ASW Wien #07 141	Stamenkovi? et al. (2013)	growth rate	2.74602326927e-07	2.7460221001421e-07	297.584553679852	268.15	3.55149582471252e-06
Cosmarium crenatum	Stamenkovi? and Hanelt (2013)	growth rate	2.74602326927e-07	2.7460221001421e-07	297.584553679852	268.15	3.55149582471252e-06
Cosmarium meneghinii strain SVCK 59, 1927/Praha Ac. A 231	Stamenkovi? et al. (2013)	growth rate	2.63196053612e-08	2.63196026328718e-08	295.208770833566	268.15	7.83780876508814e-06
Cosmarium meneghinii	Stamenkovi? and Hanelt (2013)	growth rate	2.63196053612e-08	2.63196026328718e-08	295.208770833566	268.15	7.83780876508814e-06
Cosmarium punctulatum #571	Stamenkovi? and Hanelt (2013)	growth rate	3.96269197646e-08	3.96269085116196e-08	295.63640432954	268.15	3.56617884347681e-06
Cosmarium punctulatum var. subpunctulatum strain SVCK 571, ASW Wien #07 136	Stamenkovi? et al. (2013)	growth rate	3.96269197646e-08	3.96269085116196e-08	295.63640432954	268.15	3.56617884347681e-06
Crocosphaera watsonii strain 3A	Boyd et al. (2013)	growth rate	7.94446136006e-08	7.94446136006e-08	305.643157836564	268.15	4.48518098091373e-06
Crocosphaera watsonii strain WH005	Boyd et al. (2013)	growth rate	1.39059704657e-11	1.39059690688701e-11	297.906171705954	268.15	6.06670206892669e-06
Crocosphaera watsonii strain WH84	Boyd et al. (2013)	growth rate	1.32210335629e-15	1.3221033562317e-15	297.051945043695	268.15	5.90036875307264e-06
Cryptomonas marssonii	Butterwick et al. (2005)	growth rate	2.78712663408e-07	2.74532109187619e-07	281.234848418904	268.15	6.47384524002745e-06
Cryptomonas marssonii	Butterwick et al. (2005)	growth rate	2.52438186466e-07	2.48862965758202e-07	281.036516365493	268.15	6.48187077467527e-06
Cryptomonas sp. strain F	Throndsen (1976)	growth rate	3.21817500741e-06	3.21817493260543e-06	298.864374763532	268.15	1.128702751171e-05
Cylindrotheca closterium	Maddux & Jones (1964)	growth rate	3.91825157918e-08	3.91736311323454e-08	291.271592597273	268.15	6.86779846278329e-06
Dactyliosolen fragilissimus	Ignatiades & Smayda (1970)	growth rate	7.50764657393e-09	7.50384508775955e-09	282.662722287677	268.15	8.69851701380925e-06
Desmodesmus quadricaudatus strain A 119, Greifswald/15	Komï¿½rek & Ruzicka (1969)	growth rate	1.00148781094e-08	1.00103554007686e-08	292.122055002234	268.15	1.42223715974239e-05
Diacronema lutheri strain NEPCC 5	Thompson (1992)	growth rate	9.93244641374e-07	9.93244641374e-07	298.590057516742	268.15	2.51643462662383e-05
Dinobryon divergens	Butterwick et al. (2005)	growth rate	6.32171025598e-07	6.31144295365897e-07	290.139441194581	268.15	5.43293889426605e-06
Dinobryon divergens	Butterwick et al. (2005)	growth rate	6.27075335338e-07	6.26077363654972e-07	290.077789867508	268.15	5.43643212568463e-06
Ditylum brightwellii	Paasche (1968)	growth rate	2.22363501491e-06	2.22363393809011e-06	301.957182766372	268.15	2.07353013059069e-05
Dunaliella sp.	Van Auken & McNulty (1973)	growth rate	2.1052040982e-07	2.10520409819999e-07	308.08548213123	268.15	8.58417872480514e-06
Emiliania huxleyi strain B92/21	Conte et al. (1998)	growth rate	1.63909494263e-06	1.63909010980857e-06	297.445786145705	268.15	1.09885281145553e-05
Emiliania huxleyi strain G1779Ga	Conte et al. (1998)	growth rate	5.69371777756e-07	5.69137215753104e-07	294.303738651413	268.15	1.31791515199175e-05
Emiliania huxleyi strain S. Africa	Conte et al. (1998)	growth rate	2.91809954023e-07	2.91808709004087e-07	298.373699247902	268.15	1.02504817657214e-05
Emiliania huxleyi strain Van556	Conte et al. (1998)	growth rate	4.81200155106e-06	4.81200155106e-06	297.517674673485	268.15	9.64748077202019e-06
Eutreptiella gymnastica	Throndsen (1976)	growth rate	3.09374725285e-06	3.09373026159387e-06	294.915413484091	268.15	1.81208157698841e-05
Fibrocapsa japonica strain CAWR-19	de Boer et al. (2005)	growth rate	4.17735688209e-07	4.1773565075318e-07	301.386627421744	268.15	3.84319472052506e-06
Fibrocapsa japonica strain CCRuG-C13	de Boer et al. (2005)	growth rate	7.85016603199e-08	7.84165335378144e-08	291.998430644308	268.15	4.49462132989358e-06
Fibrocapsa japonica strain CS-332	de Boer et al. (2005)	growth rate	1.72065868763e-08	1.72065446998359e-08	295.569684233351	268.15	4.41723361162314e-06
Gephyrocapsa oceanica strain AB1, CAWPOT	Conte et al. (1998)	growth rate	6.5510314591e-07	6.5509582743215e-07	299.217082800462	268.15	1.10067575686672e-05
Gephyrocapsa oceanica var. typica strain A4725	Bollmann et al. (2010)	growth rate	2.07829668054e-07	2.0782652053257e-07	300.02632068733	268.15	1.46018981921519e-05
Gephyrocapsa oceanica var. typica strain A4727	Bollmann et al. (2010)	growth rate	1.56138439983e-07	1.56133239344278e-07	299.121102089396	268.15	1.44849041685872e-05
Gymnodinium catenatum strain GCCV-10	Band-Schmidt (2004)	growth rate	2.07410437878e-07	2.07405218560862e-07	300.395700479544	268.15	2.31086449818628e-06
Gymnodinium isolate 582 (probably G. simplex)	Thomas (1966)	growth rate	2.01065393581e-07	2.01065287884635e-07	299.956458539554	268.15	1.32949473583579e-05
Gymnodinium sp. isolate 581 (probably G. simplex)	Thomas (1966)	growth rate	2.3275717056e-07	2.32756211398076e-07	301.351454147512	268.15	8.9120647842756e-06
Gyrodinium uncatenum strain GYRO	Anderson (1985)	growth rate	2.57049382207e-08	2.56912711475263e-08	294.038267015081	268.15	5.24203075150367e-06
Heterocapsa rotundata	Throndsen (1976)	growth rate	2.65249419706e-06	2.65249417154964e-06	296.589708687917	268.15	1.824070937964e-05
Heteromastix pyriformis	Throndsen (1976)	growth rate	2.64493516868e-06	2.64493516858145e-06	295.802326975461	268.15	1.85767175924093e-05
Karenia brevis strain APA	McKay et al. (2006)	growth rate	5.44227288611e-09	5.44226896133662e-09	296.187043647197	268.15	2.52244846736616e-06
Leonella granifera strain GeoB*39	Meier et al. (2004)	growth rate	1.26114300182e-11	1.26114290137993e-11	294.665858909876	268.15	4.51426417075036e-06
Leonella granifera	Meier et al. (2004)	growth rate	1.26134310233e-10	1.26134296676781e-10	296.19224092657	268.15	4.77831020169679e-06
Leptocylindrus danicus	Hulburt (1982)	growth rate	9.26651192805e-09	9.2665117166138e-09	299.356089806859	268.15	1.98989975954023e-05
Mastigocladus laminosus strain NZ-86-m	Miyamoto et al. (1979)	growth rate	2.31999147636e-07	2.31999147635619e-07	324.570453497967	268.15	8.20215490970507e-06
Men. 5 (Diatom)	Hulburt (1982)	growth rate	7.99136264519e-08	7.98638066614344e-08	293.629019169895	268.15	1.74702630180752e-05
Microcystis aeruginosa strain NRC-1	Krï¿½ger & Eloff (1978)	growth rate	4.70005635947e-11	4.70002653077863e-11	292.366375376905	268.15	3.06858763976204e-06
Odontella mobiliensis	Hulburt (1982)	growth rate	1.83850623858e-08	1.83850517476249e-08	298.6841191801	268.15	1.61458026245307e-05
Olisthodiscus luteus clone OLMS	Tomas (1978)	growth rate	6.69793149074e-07	6.59308676855006e-07	290.530395870364	268.15	9.72900724152945e-06
Olisthodiscus luteus	Throndsen (1976)	growth rate	2.28735915537e-07	2.28447169117047e-07	284.877219925779	268.15	9.81025559760431e-06
Peridinium sp. strain 1	Barker (1935)	growth rate	3.90330623271e-07	3.90329691110276e-07	294.173427258255	268.15	7.07368521847175e-06
Peridinium sp.	Barker (1935)	growth rate	3.67233170225e-07	3.67232043596247e-07	294.026925166414	268.15	7.05904069697254e-06
Pernambugia tuberosa strain GeoB*74	Meier et al. (2004)	growth rate	4.83994541553e-08	4.83988849944951e-08	297.446977602284	268.15	3.83841262519856e-06
Phaeodactylum tricornutum clone Pet Pd	Fawley (1984)	growth rate	3.12889143235e-06	3.1288914316133e-06	299.466312202401	268.15	1.7124091733677e-05
Phaeodactylum tricornutum	Ryther (1954)	growth rate	1.08344404371e-06	1.08316961124569e-06	292.635195134871	268.15	3.9449268010546e-06
Planktothrix agardhii	van Liere (1979)	growth rate	7.92329158731e-07	7.92329158730991e-07	308.565587871642	268.15	8.50361265835955e-06
Pleurochrysis carterae	Blankley & Lewin (1976)	growth rate	2.17985729687e-07	2.17985673750641e-07	296.622462394774	268.15	3.78296387011248e-06
Proboscia inermis	Boyd et al. (2013)	growth rate	2.13899547874e-06	2.13899547873998e-06	279.598495730424	268.15	3.77599046371914e-06
Prochlorococcus marinus eMED4	Johnson et al. (2006)	growth rate	1.46690386961e-07	1.46690374455206e-07	298.939986642737	268.15	5.47242189301727e-06
Prochlorococcus marinus strain MIT9215 (clade 1)	Johnson (2006)	growth rate	3.44235854082e-09	3.44220890682963e-09	295.930258435049	268.15	5.40190258267846e-06
Prochlorococcus marinus strain MIT9215 (clade 1)	Johnson et al. (2006)	growth rate	4.1816322569e-09	4.18142378447756e-09	296.036244737722	268.15	5.41729708990948e-06
Prochlorococcus marinus strain MIT9312 (clade 1)	Johnson (2006)	growth rate	1.9309336791e-07	1.93093367909996e-07	301.310638611019	268.15	7.21935646814197e-06
Prochlorococcus marinus strain MIT9312 (clade 1)	Johnson et al. (2006)	growth rate	1.95434403927e-07	1.95434403926996e-07	301.303313735906	268.15	7.23474772446737e-06
Prochlorococcus marinus strain MIT9313	Zinser et al. (2007)	growth rate	2.17737989102e-07	2.17737989101297e-07	302.713981600532	268.15	5.35914916987656e-06
Prochlorococcus marinus strain MIT9515 (clade 2)	Johnson (2006)	growth rate	1.46991773538e-07	1.46991759860596e-07	298.932973143654	268.15	5.49866478463142e-06
Prochlorococcus marinus strain NATL2A	Zinser et al. (2007)	growth rate	1.54205909937e-07	1.54205888004428e-07	299.048069166797	268.15	5.53388839837596e-06
Prorocentrum gracile	Barker (1935)	growth rate	5.57263268882e-08	5.57263268882e-08	293.115794995004	268.15	8.99439656044625e-06
Prorocentrum minimum	Grzebyk & Berland (1996)	growth rate	8.66959220185e-07	8.66959220104069e-07	301.405908713503	268.15	8.51161129696146e-06
Prorocentrum minimum	Grzebyk and Berland (1996)	growth rate	8.5907966879e-07	8.59079668698418e-07	301.384534116032	268.15	8.50519535697169e-06
Pseudo-nitzschia turgiduloides	Fiala & Oriol (1990)	growth rate	4.9703006088e-07	4.96187466977219e-07	277.276544911754	268.15	5.72956288127656e-06
Pseudopedinella pyriformis	Throndsen (1976)	growth rate	1.59945012019e-06	1.59943690051625e-06	290.577212307715	268.15	1.40423090585594e-05
Pyrodinium bahamense var. compressum	Usup et al. (1994)	growth rate	2.43038145069e-07	2.43038145068054e-07	306.716801862561	268.15	3.08230913198478e-06
Pyrodinium bahamense var. compressum strain PbSA01	Usup et al. (1994)	growth rate	2.80634667737e-07	2.80634667736155e-07	306.774596186052	268.15	3.05794081130804e-06
Rhizosolenia fragilissimus	Ignatiades & Smayda (1970)	growth rate	7.50764657393e-09	7.50384508775955e-09	282.662722287677	268.15	8.69851701380925e-06
Rhizosolenia setigera	Hulburt (1982)	growth rate	1.62457527765e-06	1.6245744784118e-06	288.297858120936	268.15	6.49497641714264e-06
Rhizosolenia setigera	Hulburt (1982)	growth rate	7.79100166526e-10	7.7909171312954e-10	289.619097903722	268.15	1.41999014057543e-05
Scrippsiella trochoidea strain ScrpMxB	Binder & Anderson (1987)	growth rate	2.49278835884e-06	2.49278835884e-06	295.669200123585	268.15	5.59451057088086e-06
Skeletonema marinoionohrnii complex	Kaeriyama et al. (2011)	growth rate	4.60269047713e-06	4.52425194123146e-06	299.175754179975	268.15	1.85680507665674e-05
Skeletonema menzelii	Kaeriyama et al. (2011)	growth rate	7.39364837118e-07	7.3906296108707e-07	298.030852818681	268.15	2.36137752609628e-05
Skeletonema tropicum clone fall	Hulburt (1982)	growth rate	6.88011279155e-16	6.8801127912657e-16	287.262038362319	268.15	1.66148379182415e-05
Skeletonema tropicum	Kaeriyama et al. (2011)	growth rate	7.69538635199e-07	7.6771176680848e-07	297.378146049402	268.15	1.63534616878868e-05
Synechococcus sp. strain UV-005, PCC 6311	Krï¿½ger & Eloff (1978)	growth rate	4.42405571761e-12	4.42405027812015e-12	289.271212717357	268.15	3.59347000252549e-06
Thalassiosira pseudonana strain CCMP1011, STX97	Boyd et al. (2013)	growth rate	9.64083872719e-07	9.64083872717532e-07	299.544600390483	268.15	1.37492695009408e-05
Thalassiosira pseudonana strain CCMP1012, SWAN1	Boyd et al. (2013)	growth rate	2.70288694389e-07	2.70288693753812e-07	298.16942059731	268.15	1.71760522596401e-05
Thalassiosira pseudonana strain CCMP1013, W	Boyd et al. (2013)	growth rate	3.81598685358e-07	3.81598685357999e-07	302.6570679237	268.15	2.23890649315002e-05
Thalassiosira pseudonana strain CCMP1014, FCRG66	Boyd et al. (2013)	growth rate	1.74759414357e-06	1.74759414357e-06	303.810143265098	268.15	1.90359444780667e-05
Thalassiosira pseudonana strain CCMP1015, ARC5	Boyd et al. (2013)	growth rate	2.0067580149e-06	2.00675801489992e-06	304.114508628148	268.15	1.832442143134e-05
Thalassiosira pseudonana	Thompson et al. (1992)	growth rate	1.13503680248e-06	1.1344637739716e-06	298.463116827864	268.15	2.09368995210256e-05
Thalassiosira rotula strain CCAP1085_21	Boyd et al. (2013)	growth rate	6.27261598579e-07	6.2150200978942e-07	286.733428502222	268.15	8.97839049004475e-06
Thalassiosira rotula strain CCMP3096	Boyd et al. (2013)	growth rate	1.00304639454e-06	9.79057893950816e-07	285.456439371713	268.15	8.10412469389283e-06
Thalassiosira rotula strain CCMP3264	Boyd et al. (2013)	growth rate	1.70989435466e-07	1.69835661171924e-07	282.991302101434	268.15	9.27428106218579e-06
Thalassiosira rotula strain JpnTR18	Boyd et al. (2013)	growth rate	1.1271159646e-06	1.0769371185756e-06	282.412378356226	268.15	7.44632670645909e-06
Thalassiosira rotula	Baars (1981)	growth rate	1.46607326849e-07	1.46183613492683e-07	279.74509560116	268.15	1.75082989998609e-05
Trichodesmium erythraeum strain 21_75	Boyd et al. (2013)	growth rate	6.03425722741e-11	6.03425649727123e-11	297.652509207429	268.15	3.10353690829505e-06
Trichodesmium erythraeum strain KO4_20	Boyd et al. (2013)	growth rate	4.78908712864e-10	4.78908686451877e-10	299.074650393003	268.15	3.624625407514e-06
Trichodesmium radians strain H94	Chappell & Webb (2010)	growth rate	6.3899954104e-15	6.38999541039912e-15	298.661417605778	268.15	4.2498535546859e-06
Akashiwo sanguinea strain BWA	Boyd et al. (2013)	growth rate	6.37703452396e-07	6.37692699439999e-07	300.308275668999	270.65	4.21902757884016e-06
Akashiwo sanguinea strain GBB	Boyd et al. (2013)	growth rate	8.61611210653e-07	8.61605548901671e-07	302.229179268234	270.65	4.96365291315654e-06
Akashiwo sanguinea strain RMB	Boyd et al. (2013)	growth rate	4.3788674761e-07	4.37886657321229e-07	300.97680364175	270.65	4.2867887942948e-06
Akashiwo sanguinea strain YRB	Boyd et al. (2013)	growth rate	1.56611951094e-06	1.56611951093992e-06	304.168563138427	270.65	4.71375329510646e-06
Alexandrium minutum	Cannon (1993)	growth rate	1.3456388648e-10	1.34559976457894e-10	286.476433405839	270.65	3.48128133681223e-06
Alexandrium ostenfeldii clone LF-37	Jensen & Moestrup (1997)	growth rate	2.9513500287e-08	2.95134112654175e-08	293.992189160248	270.65	2.54571132747321e-06
Alexandrium ostenfeldii clone LF-37	Jensen and Moestrup (1997)	growth rate	3.14838677409e-08	3.14837051729817e-08	293.958950165146	270.65	2.5008435303587e-06
Alexandrium tamarense clone GTMP	Watras et al. (1982)	growth rate	1.63858559113e-09	1.63827275329457e-09	283.307324551428	270.65	4.04804637974917e-06
Amphidinium klebsii	Morton et al. (1992)	growth rate	2.19403991969e-09	2.1940399161422e-09	301.65430938387	270.65	4.38112830828839e-06
Amphiprora sp.	Hulburt (1982)	growth rate	1.01055458081e-07	1.01055381729458e-07	302.007904790408	270.65	1.01726847484854e-05
Apedinella radians	Throndsen (1976)	growth rate	2.13776879604e-08	2.13565603354248e-08	284.645649938096	270.65	1.38599507117711e-05
Biceratium furca	Baek et al. (2008)	growth rate	7.22732173062e-12	7.2273164729663e-12	288.693234683766	270.65	5.57268301600613e-06
Ceratium furca	Baek et al. (2008)	growth rate	2.62529406613e-10	2.62525989602285e-10	289.769144215381	270.65	6.04765740519876e-06
Chaetoceros didymus	Hulburt (1982)	growth rate	5.74487356267e-17	5.74487356265444e-17	286.520468102795	270.65	1.5732192874148e-05
Chaetoceros gracilis strain NEPCC 645	Thompson (1992)	growth rate	3.47151000004e-07	3.46397811054628e-07	290.969064300078	270.65	1.87063290853211e-05
Chaetoceros gracilis	Thompson et al. (1992)	growth rate	4.26725362289e-07	4.26038878898192e-07	291.62276982032	270.65	1.86132261245283e-05
Chaetoceros lorenzianus clone Bushehr	Hulburt (1982)	growth rate	7.53444916265e-07	7.5344491346679e-07	302.421280792777	270.65	1.94180573529206e-05
Chaetoceros sp.	Thomas (1966)	growth rate	1.49947933905e-09	1.49943706195978e-09	292.353888469298	270.65	4.08934958309955e-05
Chattonella marina	Kahn (1998)	growth rate	1.76430863945e-07	1.76384846308433e-07	296.692872875449	270.65	4.9650919420363e-06
Chlamydomonas alpina	Seaburg et al. (1981)	growth rate	4.04958535994e-07	4.04958318430322e-07	287.640464432392	270.65	1.08329961108976e-05
Chlamydomonas reinhardtii	McCombie (1960)	growth rate	2.56271880331e-09	2.56065761585018e-09	289.979515725735	270.65	8.20100274395928e-07
Chlamydomonas subcaudata	Seaburg et al. (1981)	growth rate	2.78063718067e-06	2.78063698681682e-06	288.322572765961	270.65	1.12556325022975e-05
Chlorella MFD1	James et al. (1989)	growth rate	5.0175975538e-07	5.00299413671144e-07	299.358218212764	270.65	2.13586292120807e-06
Chlorella sorokiniana strain CCAP 211/8K, 7-11-05	Sorokin (1960)	growth rate	3.48372233864e-09	3.48372209215047e-09	305.611551261839	270.65	8.01894233400186e-05
Chlorella sp. strain MFD-1	James et al. (1989)	growth rate	3.79629118305e-07	3.78681176485097e-07	299.855683840577	270.65	1.50626097972815e-06
Chrysochromulina polylepis strain B3	Edvardsen (1992)	growth rate	1.29690237837e-06	1.29688917851956e-06	291.556259362148	270.65	1.00283287429775e-05
Chrysochromulina polylepis strain B4	Edvardsen (1992)	growth rate	1.24758799174e-06	1.24758615425541e-06	292.641339159638	270.65	8.60334734877152e-06
Chrysochromulina polylepis strain K	Edvardsen (1992)	growth rate	7.97870648763e-07	7.97135413013808e-07	292.357669587015	270.65	9.92215812437172e-06
Cochlodinium polykrikoides strain KG8-ND14	Yamatogi (2005)	growth rate	1.44609501783e-07	1.44606166296183e-07	301.624340376591	270.65	6.42953667328579e-06
Conticribra guillardii clone 7-15	Guillard & Ryther (1962)	growth rate	1.0073144943e-06	9.99054821524218e-07	285.181512725777	270.65	1.83323118187824e-05
Conticribra weissflogii strain CCMP1053, SA	Boyd et al. (2013)	growth rate	1.52952130064e-07	1.52950546692289e-07	292.241441995648	270.65	8.41706905288486e-06
Cosmarium beatum SVCK 533	Stamenkovi? et al. (2013)	growth rate	4.19441536435e-09	4.19433051679274e-09	293.244360756015	270.65	4.08553512647845e-06
Cosmarium beatum	Stamenkovi? and Hanelt (2013)	growth rate	4.19441536435e-09	4.19433051679274e-09	293.244360756015	270.65	4.08553512647845e-06
Cosmarium crenatum var. boldtianum strain SVCK 561, ASW Wien #07 141	Stamenkovi? et al. (2013)	growth rate	3.65881164019e-07	3.65880551035105e-07	297.584553672708	270.65	3.55149583005568e-06
Cosmarium crenatum	Stamenkovi? and Hanelt (2013)	growth rate	3.65881164019e-07	3.65880551035105e-07	297.584553672708	270.65	3.55149583005568e-06
Cosmarium meneghinii strain SVCK 59, 1927/Praha Ac. A 231	Stamenkovi? et al. (2013)	growth rate	5.00000158679e-08	4.99999896595949e-08	295.208770982637	270.65	7.83780863222384e-06
Cosmarium meneghinii	Stamenkovi? and Hanelt (2013)	growth rate	5.00000158679e-08	4.99999896595949e-08	295.208770982637	270.65	7.83780863222384e-06
Cosmarium punctulatum #571	Stamenkovi? and Hanelt (2013)	growth rate	6.60439325666e-08	6.60438487108692e-08	295.636404281318	270.65	3.56617887422172e-06
Cosmarium punctulatum var. subpunctulatum strain SVCK 571, ASW Wien #07 136	Stamenkovi? et al. (2013)	growth rate	6.60439325666e-08	6.60438487108692e-08	295.636404281318	270.65	3.56617887422172e-06
Crocosphaera watsonii strain 3A	Boyd et al. (2013)	growth rate	1.10575467125e-07	1.10575467125e-07	305.643157290176	270.65	4.48518072916045e-06
Crocosphaera watsonii strain WH005	Boyd et al. (2013)	growth rate	4.81741197316e-11	4.8174098257436e-11	297.906171705954	270.65	6.06670206878612e-06
Crocosphaera watsonii strain WH84	Boyd et al. (2013)	growth rate	1.11325767892e-14	1.11325767844782e-14	297.051945043695	270.65	5.90036875297209e-06
Cryptomonas marssonii	Butterwick et al. (2005)	growth rate	5.65611915088e-07	5.46511386616765e-07	281.234849204142	270.65	6.47384632596517e-06
Cryptomonas marssonii	Butterwick et al. (2005)	growth rate	5.26608012073e-07	5.09405087213977e-07	281.036516755868	270.65	6.48187080228796e-06
Cryptomonas sp. strain F	Throndsen (1976)	growth rate	3.70045418269e-06	3.70045376515686e-06	298.864374763532	270.65	1.12870275120998e-05
Cylindrotheca closterium	Maddux & Jones (1964)	growth rate	7.68217595719e-08	7.67755283749993e-08	291.27159259738	270.65	6.86779846686229e-06
Dactyliosolen fragilissimus	Ignatiades & Smayda (1970)	growth rate	2.7621489093e-08	2.75667983516225e-08	282.66272232971	270.65	8.69851703069468e-06
Desmodesmus quadricaudatus strain A 119, Greifswald/15	Komï¿½rek & Ruzicka (1969)	growth rate	2.30793019927e-08	2.30545146495944e-08	292.122057834064	270.65	1.42223723583474e-05
Diacronema lutheri strain NEPCC 5	Thompson (1992)	growth rate	1.34582264624e-06	1.34582264624e-06	298.585143339195	270.65	2.51785950242021e-05
Dinobryon divergens	Butterwick et al. (2005)	growth rate	8.93353746227e-07	8.90186470761713e-07	290.139441494984	270.65	5.43293889182725e-06
Dinobryon divergens	Butterwick et al. (2005)	growth rate	8.87895702989e-07	8.8479704185659e-07	290.077790185132	270.65	5.4364321248468e-06
Ditylum brightwellii	Paasche (1968)	growth rate	2.78168738316e-06	2.78168291235416e-06	301.9571821409	270.65	2.07353003333603e-05
Dunaliella sp.	Van Auken & McNulty (1973)	growth rate	2.81581581364e-07	2.81581581363988e-07	308.085482279028	270.65	8.58417857614207e-06
Emiliania huxleyi strain B92/21	Conte et al. (1998)	growth rate	2.04995905185e-06	2.04993909881584e-06	297.445786387388	270.65	1.09885280588865e-05
Emiliania huxleyi strain G1779Ga	Conte et al. (1998)	growth rate	8.48221104686e-07	8.47435889612316e-07	294.303741586747	270.65	1.31791529651693e-05
Emiliania huxleyi strain S. Africa	Conte et al. (1998)	growth rate	4.2798106096e-07	4.27975422270652e-07	298.373698023473	270.65	1.02504815433461e-05
Emiliania huxleyi strain Van556	Conte et al. (1998)	growth rate	5.16831607881e-06	5.16831607881e-06	297.517674675466	270.65	9.64748076869665e-06
Eutreptiella gymnastica	Throndsen (1976)	growth rate	3.88886617735e-06	3.88879290526273e-06	294.915413157748	270.65	1.81208156530778e-05
Fibrocapsa japonica strain CAWR-19	de Boer et al. (2005)	growth rate	5.22250662737e-07	5.22250480436096e-07	301.386627198354	270.65	3.84319472364395e-06
Fibrocapsa japonica strain CCRuG-C13	de Boer et al. (2005)	growth rate	1.33140584116e-07	1.32828544735053e-07	291.998429693229	270.65	4.49462131061934e-06
Fibrocapsa japonica strain CS-332	de Boer et al. (2005)	growth rate	3.20297392363e-08	3.20294550671137e-08	295.56968437582	270.65	4.41723420104355e-06
Gephyrocapsa oceanica strain AB1, CAWPOT	Conte et al. (1998)	growth rate	8.89120047211e-07	8.89092656127633e-07	299.2170795439	270.65	1.10067568221583e-05
Gephyrocapsa oceanica var. typica strain A4725	Bollmann et al. (2010)	growth rate	3.19303452502e-07	3.19290761712122e-07	300.026312565579	270.65	1.46018970499616e-05
Gephyrocapsa oceanica var. typica strain A4727	Bollmann et al. (2010)	growth rate	2.48815609527e-07	2.48794820062438e-07	299.121101385415	270.65	1.44849040829175e-05
Gymnodinium isolate 582 (probably G. simplex)	Thomas (1966)	growth rate	3.06201432713e-07	3.06200865526429e-07	299.956457945077	270.65	1.32949462858113e-05
Gymnodinium sp. isolate 581 (probably G. simplex)	Thomas (1966)	growth rate	3.33510622668e-07	3.33506736055745e-07	301.351454147512	270.65	8.91206478427561e-06
Gyrodinium uncatenum strain GYRO	Anderson (1985)	growth rate	4.74846155786e-08	4.74289697119718e-08	294.038268478292	270.65	5.24203093120216e-06
Heterocapsa rotundata	Throndsen (1976)	growth rate	3.31184619696e-06	3.3118460084188e-06	296.589708715171	270.65	1.82407094035935e-05
Heteromastix pyriformis	Throndsen (1976)	growth rate	3.30716301736e-06	3.30716301603818e-06	295.802326975464	270.65	1.85767175922528e-05
Karenia brevis strain APA	McKay et al. (2006)	growth rate	1.0599531041e-08	1.05995006559983e-08	296.187045689347	270.65	2.52244848008681e-06
Leonella granifera strain GeoB*39	Meier et al. (2004)	growth rate	4.92506802656e-11	4.92506592642121e-11	294.665860695395	270.65	4.51426447286668e-06
Leonella granifera	Meier et al. (2004)	growth rate	3.74606592006e-10	3.74606399351131e-10	296.192236549216	270.65	4.77830878591447e-06
Leptocylindrus danicus	Hulburt (1982)	growth rate	1.94438927468e-08	1.94438906373103e-08	299.356089806859	270.65	1.98989975954022e-05
Mastigocladus laminosus strain NZ-86-m	Miyamoto et al. (1979)	growth rate	2.86676210782e-07	2.86676210780011e-07	324.57045328146	270.65	8.20215507105337e-06
Men. 5 (Diatom)	Hulburt (1982)	growth rate	1.49600512073e-07	1.49396074930334e-07	293.629027259625	270.65	1.74702642498104e-05
Microcystis aeruginosa strain NRC-1	Krï¿½ger & Eloff (1978)	growth rate	1.65751546709e-10	1.6574755094774e-10	292.366376416249	270.65	3.06858775423922e-06
Odontella mobiliensis	Hulburt (1982)	growth rate	3.61081910938e-08	3.61081146021857e-08	298.684118806219	270.65	1.61458024917211e-05
Olisthodiscus luteus clone OLMS	Tomas (1978)	growth rate	9.8415197941e-07	9.59091988389185e-07	290.530402644513	270.65	9.72900759162327e-06
Olisthodiscus luteus	Throndsen (1976)	growth rate	4.57035741569e-07	4.55391172042765e-07	284.877219925779	270.65	9.81025559761954e-06
Peridinium sp. strain 1	Barker (1935)	growth rate	5.61312719019e-07	5.61307539531907e-07	294.173425521284	270.65	7.07368458640041e-06
Peridinium sp.	Barker (1935)	growth rate	5.32957050623e-07	5.32950853835162e-07	294.026922751471	270.65	7.05904011110138e-06
Pernambugia tuberosa strain GeoB*74	Meier et al. (2004)	growth rate	7.77951854633e-08	7.77925330231502e-08	297.44697469214	270.65	3.83841216957305e-06
Phaeodactylum tricornutum clone Pet Pd	Fawley (1984)	growth rate	3.73451837113e-06	3.73451836489848e-06	299.466313116408	270.65	1.71240917991273e-05
Phaeodactylum tricornutum	Ryther (1954)	growth rate	1.32435599782e-06	1.3235194637308e-06	292.635195209865	270.65	3.94492679754159e-06
Planktothrix agardhii	van Liere (1979)	growth rate	9.55747191399e-07	9.55747191398894e-07	308.565587871642	270.65	8.50361265836e-06
Pleurochrysis carterae	Blankley & Lewin (1976)	growth rate	3.01908652737e-07	3.01908319027776e-07	296.622462591531	270.65	3.7829638585809e-06
Proboscia inermis	Boyd et al. (2013)	growth rate	2.4878596925e-06	2.48785969245988e-06	279.598497839001	270.65	3.77598870927476e-06
Prochlorococcus marinus eMED4	Johnson et al. (2006)	growth rate	2.13586727651e-07	2.13586649258636e-07	298.939986563153	270.65	5.47242186979305e-06
Prochlorococcus marinus strain MIT9215 (clade 1)	Johnson (2006)	growth rate	7.47433455637e-09	7.47346177206585e-09	295.930254484422	270.65	5.40190239659312e-06
Prochlorococcus marinus strain MIT9215 (clade 1)	Johnson et al. (2006)	growth rate	8.89502064981e-09	8.893849289614e-09	296.036244034206	270.65	5.41729705674698e-06
Prochlorococcus marinus strain MIT9312 (clade 1)	Johnson (2006)	growth rate	2.70192074173e-07	2.70192074172914e-07	301.310639016477	270.65	7.21935693259224e-06
Prochlorococcus marinus strain MIT9312 (clade 1)	Johnson et al. (2006)	growth rate	2.73212451163e-07	2.73212451162925e-07	301.303313748419	270.65	7.23474770826981e-06
Prochlorococcus marinus strain MIT9313	Zinser et al. (2007)	growth rate	2.91376042521e-07	2.91376042513005e-07	302.713981516105	270.65	5.3591491221085e-06
Prochlorococcus marinus strain MIT9515 (clade 2)	Johnson (2006)	growth rate	2.14128115154e-07	2.141280300209e-07	298.93297080055	270.65	5.49866461305759e-06
Prochlorococcus marinus strain NATL2A	Zinser et al. (2007)	growth rate	2.23620156708e-07	2.23620026502626e-07	299.048068571659	270.65	5.53388835632421e-06
Prorocentrum gracile	Barker (1935)	growth rate	9.80773895674e-08	9.80773895674e-08	293.115794979242	270.65	8.99439654458759e-06
Prorocentrum minimum	Grzebyk & Berland (1996)	growth rate	1.0813565676e-06	1.08135656690216e-06	301.405908706296	270.65	8.51161129341759e-06
Prorocentrum minimum	Grzebyk and Berland (1996)	growth rate	1.07262302262e-06	1.07262302183738e-06	301.384534839273	270.65	8.50519506462131e-06
Pseudo-nitzschia turgiduloides	Fiala & Oriol (1990)	growth rate	1.19896030786e-06	1.18688929650085e-06	277.27654549009	270.65	5.72956288691441e-06
Pseudopedinella pyriformis	Throndsen (1976)	growth rate	2.2132574879e-06	2.213183259595e-06	290.577211640031	270.65	1.4042308011566e-05
Pyrodinium bahamense var. compressum	Usup et al. (1994)	growth rate	3.00443395067e-07	3.00443395058946e-07	306.716801592913	270.65	3.08230914796034e-06
Pyrodinium bahamense var. compressum strain PbSA01	Usup et al. (1994)	growth rate	3.42588397599e-07	3.42588397591778e-07	306.774596605765	270.65	3.05794092053004e-06
Rhizosolenia fragilissimus	Ignatiades & Smayda (1970)	growth rate	2.7621489093e-08	2.75667983516225e-08	282.66272232971	270.65	8.69851703069468e-06
Rhizosolenia setigera	Hulburt (1982)	growth rate	2.04850837353e-06	2.04850150076043e-06	288.297858184694	270.65	6.49497643387672e-06
Rhizosolenia setigera	Hulburt (1982)	growth rate	2.76312569953e-09	2.76300112010813e-09	289.619097427635	270.65	1.41999012097524e-05
Scrippsiella trochoidea strain ScrpMxB	Binder & Anderson (1987)	growth rate	2.72460586388e-06	2.72460586388e-06	295.669200652807	270.65	5.59451034994931e-06
Skeletonema marinoionohrnii complex	Kaeriyama et al. (2011)	growth rate	5.54322839157e-06	5.4086639408568e-06	299.175728518369	270.65	1.85680508535684e-05
Skeletonema menzelii	Kaeriyama et al. (2011)	growth rate	1.0841750613e-06	1.08326703479128e-06	298.030844264674	270.65	2.36137713928212e-05
Skeletonema tropicum clone fall	Hulburt (1982)	growth rate	1.9091534409e-14	1.90915343871053e-14	287.262309229843	270.65	1.66151174979177e-05
Skeletonema tropicum	Kaeriyama et al. (2011)	growth rate	1.0918365939e-06	1.08727196650277e-06	297.378146668939	270.65	1.63534627205774e-05
Synechococcus sp. strain UV-005, PCC 6311	Krï¿½ger & Eloff (1978)	growth rate	2.47463297998e-11	2.47461595939344e-11	289.271245005968	270.65	3.59347291407342e-06
Thalassiosira pseudonana strain CCMP1011, STX97	Boyd et al. (2013)	growth rate	1.25641360363e-06	1.25641360360895e-06	299.544600746542	270.65	1.37492702258099e-05
Thalassiosira pseudonana strain CCMP1012, SWAN1	Boyd et al. (2013)	growth rate	4.15960539463e-07	4.15960533412286e-07	298.169420634795	270.65	1.7176053720869e-05
Thalassiosira pseudonana strain CCMP1013, W	Boyd et al. (2013)	growth rate	5.47896592418e-07	5.47896592417976e-07	302.657067734	270.65	2.23890653635006e-05
Thalassiosira pseudonana strain CCMP1014, FCRG66	Boyd et al. (2013)	growth rate	2.14840592973e-06	2.14840592973e-06	303.810143278478	270.65	1.90359444026753e-05
Thalassiosira pseudonana strain CCMP1015, ARC5	Boyd et al. (2013)	growth rate	2.43798609392e-06	2.43798609391896e-06	304.114508593513	270.65	1.83244214220698e-05
Thalassiosira pseudonana	Thompson et al. (1992)	growth rate	1.57568831287e-06	1.57410255832599e-06	298.463121613615	270.65	2.09368994631085e-05
Thalassiosira rotula strain CCAP1085_21	Boyd et al. (2013)	growth rate	1.000058982e-06	9.82318816139458e-07	286.733427872736	270.65	8.97838955918539e-06
Thalassiosira rotula strain CCMP3096	Boyd et al. (2013)	growth rate	1.50884068774e-06	1.4464779796209e-06	285.456439371713	270.65	8.10412469389278e-06
Thalassiosira rotula strain CCMP3264	Boyd et al. (2013)	growth rate	3.69149941697e-07	3.63205948218471e-07	282.991301952725	270.65	9.2742810397951e-06
Thalassiosira rotula strain JpnTR18	Boyd et al. (2013)	growth rate	1.750874822e-06	1.61872364023856e-06	282.412378356226	270.65	7.44632670645754e-06
Thalassiosira rotula	Baars (1981)	growth rate	4.61717431719e-07	4.56847652854897e-07	279.745095602147	270.65	1.75082990892762e-05
Trichodesmium erythraeum strain 21_75	Boyd et al. (2013)	growth rate	1.75281674631e-10	1.75281581057448e-10	297.652509867547	270.65	3.10353697621661e-06
Trichodesmium erythraeum strain KO4_20	Boyd et al. (2013)	growth rate	1.1303761047e-09	1.1303758272499e-09	299.07465011163	270.65	3.62462599121025e-06
Trichodesmium radians strain H94	Chappell & Webb (2010)	growth rate	4.23644344842e-14	4.23644344841148e-14	298.661417605778	270.65	4.24985355468614e-06
Akashiwo sanguinea strain BWA	Boyd et al. (2013)	growth rate	7.97748509627e-07	7.97711261431782e-07	300.30827566904	273.15	4.219e-06
Akashiwo sanguinea strain GBB	Boyd et al. (2013)	growth rate	1.04776484798e-06	1.04774526668614e-06	302.229179394712	273.15	4.96365290242528e-06
Akashiwo sanguinea strain RMB	Boyd et al. (2013)	growth rate	5.62177504885e-07	5.62177035605108e-07	300.976803733577	273.15	4.28678877779946e-06
Akashiwo sanguinea strain YRB	Boyd et al. (2013)	growth rate	1.74107910666e-06	1.74107910665886e-06	304.16856318977	273.15	4.71375327491907e-06
Alexandrium minutum	Cannon (1993)	growth rate	7.35578206259e-10	7.35457585111631e-10	286.476433407062	273.15	3.48128133681191e-06
Alexandrium ostenfeldii clone LF-37	Jensen & Moestrup (1997)	growth rate	5.33254504062e-08	5.33247541317638e-08	293.992188594973	273.15	2.54571131580034e-06
Alexandrium ostenfeldii clone LF-37	Jensen and Moestrup (1997)	growth rate	5.64179866353e-08	5.64167991742441e-08	293.958950163957	273.15	2.50084353181106e-06
Alexandrium tamarense clone GTMP	Watras et al. (1982)	growth rate	8.50999846217e-09	8.50061707403357e-09	283.307323295271	273.15	4.048e-06
Amphidinium klebsii	Morton et al. (1992)	growth rate	4.58452467003e-09	4.58452462506656e-09	301.654308445734	273.15	4.38112771781813e-06
Amphiprora sp.	Hulburt (1982)	growth rate	1.60848046078e-07	1.60847625066702e-07	302.007901446668	273.15	1.01726831864098e-05
Apedinella radians	Throndsen (1976)	growth rate	7.36079337594e-08	7.33449104579204e-08	284.64564993811	273.15	1.386e-05
Biceratium furca	Baek et al. (2008)	growth rate	5.36906510813e-11	5.36903416311291e-11	288.693236312131	273.15	5.57268377597364e-06
Ceratium furca	Baek et al. (2008)	growth rate	1.09996335779e-09	1.09989519936576e-09	289.769144262716	273.15	6.04765747317586e-06
Chaetoceros didymus	Hulburt (1982)	growth rate	4.49713545283e-15	4.49713545183662e-15	286.520468368961	273.15	1.57321934383156e-05
Chaetoceros gracilis strain NEPCC 645	Thompson (1992)	growth rate	6.3077963491e-07	6.27731164280805e-07	290.969061392042	273.15	1.87063284902953e-05
Chaetoceros gracilis	Thompson et al. (1992)	growth rate	7.47e-07	7.44281413058654e-07	291.622764586539	273.15	1.86132250229605e-05
Chaetoceros lorenzianus clone Bushehr	Hulburt (1982)	growth rate	1.04359256928e-06	1.0435925482521e-06	302.421278808197	273.15	1.94180592896308e-05
Chaetoceros sp.	Thomas (1966)	growth rate	5.33802978881e-09	5.33748222579567e-09	292.353879826211	273.15	4.08934825332744e-05
Chattonella marina	Kahn (1998)	growth rate	2.68580101155e-07	2.68414553711419e-07	296.692872875611	273.15	4.96509194203548e-06
Chlamydomonas alpina	Seaburg et al. (1981)	growth rate	7.37362040103e-07	7.37358330343078e-07	287.64046449334	273.15	1.0833e-05
Chlamydomonas reinhardtii	McCombie (1960)	growth rate	6e-09	5.98718138725036e-09	289.979515232692	273.15	8.20100261755598e-07
Chlamydomonas subcaudata	Seaburg et al. (1981)	growth rate	3.60277549812e-06	3.6027725564166e-06	288.322572765409	273.15	1.12556325046059e-05
Chlorella MFD1	James et al. (1989)	growth rate	6.13228086583e-07	6.10119584592681e-07	299.358253620826	273.15	2.13586267867982e-06
Chlorella sorokiniana strain CCAP 211/8K, 7-11-05	Sorokin (1960)	growth rate	8.19485613802e-09	8.19485397354993e-09	305.611554498085	273.15	8.01894325042954e-05
Chlorella sp. strain MFD-1	James et al. (1989)	growth rate	4.58855166612e-07	4.56847297066158e-07	299.855707579198	273.15	1.50626087217007e-06
Chrysochromulina polylepis strain B3	Edvardsen (1992)	growth rate	1.8021649979e-06	1.80208544421636e-06	291.556258698665	273.15	1.00283280925966e-05
Chrysochromulina polylepis strain B4	Edvardsen (1992)	growth rate	1.67124703781e-06	1.6712344058883e-06	292.641339159398	273.15	8.60334734862381e-06
Chrysochromulina polylepis strain K	Edvardsen (1992)	growth rate	1.18521510152e-06	1.18263362982837e-06	292.357668947299	273.15	9.92215725581173e-06
Cochlodinium polykrikoides strain KG8-ND14	Yamatogi (2005)	growth rate	2.15474017604e-07	2.1546114636825e-07	301.624340016961	273.15	6.42953662078838e-06
Conticribra guillardii clone 7-15	Guillard & Ryther (1962)	growth rate	1.88453624091e-06	1.84837521337875e-06	285.181509071138	273.15	1.83323085713989e-05
Conticribra weissflogii strain CCMP1053, SA	Boyd et al. (2013)	growth rate	2.73248401924e-07	2.73236677122078e-07	292.241441995725	273.15	8.41706906772823e-06
Cosmarium beatum SVCK 533	Stamenkovi? et al. (2013)	growth rate	1.0220214945e-08	1.02194685077384e-08	293.244360602741	273.15	4.08553514197316e-06
Cosmarium beatum	Stamenkovi? and Hanelt (2013)	growth rate	1.0220214945e-08	1.02194685077384e-08	293.244360602741	273.15	4.08553514197316e-06
Cosmarium crenatum var. boldtianum strain SVCK 561, ASW Wien #07 141	Stamenkovi? et al. (2013)	growth rate	4.84947183249e-07	4.84944065346383e-07	297.584553720344	273.15	3.55149581888816e-06
Cosmarium crenatum	Stamenkovi? and Hanelt (2013)	growth rate	4.84947183249e-07	4.84944065346383e-07	297.584553720344	273.15	3.55149581888816e-06
Cosmarium meneghinii strain SVCK 59, 1927/Praha Ac. A 231	Stamenkovi? et al. (2013)	growth rate	9.38770511998e-08	9.38768096564253e-08	295.208770885487	273.15	7.83780870446445e-06
Cosmarium meneghinii	Stamenkovi? and Hanelt (2013)	growth rate	9.38770511998e-08	9.38768096564253e-08	295.208770885487	273.15	7.83780870446445e-06
Cosmarium punctulatum #571	Stamenkovi? and Hanelt (2013)	growth rate	1.09e-07	1.08999397937562e-07	295.636404350565	273.15	3.56617883615574e-06
Cosmarium punctulatum var. subpunctulatum strain SVCK 571, ASW Wien #07 136	Stamenkovi? et al. (2013)	growth rate	1.09e-07	1.08999397937562e-07	295.636404350565	273.15	3.56617883615574e-06
Crocosphaera watsonii strain 3A	Boyd et al. (2013)	growth rate	1.53e-07	1.52999999999999e-07	305.643157836519	273.15	4.48518098090632e-06
Crocosphaera watsonii strain WH005	Boyd et al. (2013)	growth rate	1.6313557843e-10	1.63135264404664e-10	297.906171705757	273.15	6.06670206742681e-06
Crocosphaera watsonii strain WH84	Boyd et al. (2013)	growth rate	9.015459278e-14	9.01545924271127e-14	297.051945043874	273.15	5.90036874562495e-06
Cryptomonas marssonii	Butterwick et al. (2005)	growth rate	1.13306322754e-06	1.0501013797386e-06	281.234849216967	273.15	6.47384632319577e-06
Cryptomonas marssonii	Butterwick et al. (2005)	growth rate	1.08386317763e-06	1.00529708916977e-06	281.036516761295	273.15	6.48187080080116e-06
Cryptomonas sp. strain F	Throndsen (1976)	growth rate	4.24414578883e-06	4.24414353051614e-06	298.864374125329	273.15	1.1287e-05
Cylindrotheca closterium	Maddux & Jones (1964)	growth rate	1.48772945041e-07	1.48539675700431e-07	291.27159259706	273.15	6.86779846686223e-06
Dactyliosolen fragilissimus	Ignatiades & Smayda (1970)	growth rate	9.92279143566e-08	9.84816580060296e-08	282.66272174508	273.15	8.69851679668479e-06
Desmodesmus quadricaudatus strain A 119, Greifswald/15	Komï¿½rek & Ruzicka (1969)	growth rate	5.23796196179e-08	5.22480436124514e-08	292.122057834363	273.15	1.42223723559845e-05
Diacronema lutheri strain NEPCC 5	Thompson (1992)	growth rate	1.81344590207e-06	1.81344590207e-06	298.580467398813	273.15	2.51922402782052e-05
Dinobryon divergens	Butterwick et al. (2005)	growth rate	1.2544782004e-06	1.24492816622581e-06	290.139441378371	273.15	5.43293889352898e-06
Dinobryon divergens	Butterwick et al. (2005)	growth rate	1.2492212081e-06	1.23981810287369e-06	290.07779010299	273.15	5.436432126309e-06
Ditylum brightwellii	Paasche (1968)	growth rate	3.46555712952e-06	3.46553904485733e-06	301.957182052307	273.15	2.07353003635909e-05
Dunaliella sp.	Van Auken & McNulty (1973)	growth rate	3.7462962612e-07	3.74629626119834e-07	308.085482187926	273.15	8.5841786639484e-06
Emiliania huxleyi strain B92/21	Conte et al. (1998)	growth rate	2.5533366258e-06	2.55325635864552e-06	297.445787113925	273.15	1.09885287086407e-05
Emiliania huxleyi strain G1779Ga	Conte et al. (1998)	growth rate	1.25444945424e-06	1.25187996523525e-06	294.303737593046	273.15	1.31791513873082e-05
Emiliania huxleyi strain S. Africa	Conte et al. (1998)	growth rate	6.23311014333e-07	6.23286173770802e-07	298.373700819661	273.15	1.02504821857129e-05
Emiliania huxleyi strain Van556	Conte et al. (1998)	growth rate	5.54376091817e-06	5.54376091817e-06	297.517674674533	273.15	9.64748078689812e-06
Eutreptiella gymnastica	Throndsen (1976)	growth rate	4.86791289027e-06	4.8676052668797e-06	294.915413119513	273.15	1.81208156745852e-05
Fibrocapsa japonica strain CAWR-19	de Boer et al. (2005)	growth rate	6.50251336873e-07	6.50250474932191e-07	301.386627029814	273.15	3.84319473640417e-06
Fibrocapsa japonica strain CCRuG-C13	de Boer et al. (2005)	growth rate	2.23635907457e-07	2.22520557241964e-07	291.998419150465	273.15	4.4946211137236e-06
Fibrocapsa japonica strain CS-332	de Boer et al. (2005)	growth rate	5.89484659969e-08	5.89466171062999e-08	295.569684113978	273.15	4.41723363195255e-06
Gephyrocapsa oceanica strain AB1, CAWPOT	Conte et al. (1998)	growth rate	1.2e-06	1.19989993522796e-06	299.217085366379	273.15	1.10067577556531e-05
Gephyrocapsa oceanica var. typica strain A4725	Bollmann et al. (2010)	growth rate	4.86729852183e-07	4.86679975008616e-07	300.026323329499	273.15	1.46018982400036e-05
Gephyrocapsa oceanica var. typica strain A4727	Bollmann et al. (2010)	growth rate	3.93134622499e-07	3.93053604432657e-07	299.12110243623	273.15	1.44849031933205e-05
Gymnodinium isolate 582 (probably G. simplex)	Thomas (1966)	growth rate	4.62736058876e-07	4.62733107437653e-07	299.956458539656	273.15	1.32949473583498e-05
Gymnodinium sp. isolate 581 (probably G. simplex)	Thomas (1966)	growth rate	4.74741192725e-07	4.74725842275537e-07	301.351454735654	273.15	8.91206535866367e-06
Gyrodinium uncatenum strain GYRO	Anderson (1985)	growth rate	8.67380334677e-08	8.65173828772795e-08	294.038259782143	273.15	5.242e-06
Heterocapsa rotundata	Throndsen (1976)	growth rate	4.11832858203e-06	4.11832723866337e-06	296.589708736337	273.15	1.82407093544143e-05
Heteromastix pyriformis	Throndsen (1976)	growth rate	4.11831773794e-06	4.11831772103399e-06	295.802326975364	273.15	1.85767175924148e-05
Karenia brevis strain APA	McKay et al. (2006)	growth rate	2.03935500841e-08	2.03933234992252e-08	296.187045547521	273.15	2.52244883908897e-06
Leonella granifera strain GeoB*39	Meier et al. (2004)	growth rate	1.8759838734e-10	1.875979719861e-10	294.665861298675	273.15	4.5142645752596e-06
Leonella granifera	Meier et al. (2004)	growth rate	1.09060161177e-09	1.09059900367543e-09	296.192236942864	273.15	4.77830883025388e-06
Leptocylindrus danicus	Hulburt (1982)	growth rate	4.02493047617e-08	4.0249284583208e-08	299.356089806909	273.15	1.9899e-05
Mastigocladus laminosus strain NZ-86-m	Miyamoto et al. (1979)	growth rate	3.52870067407e-07	3.52870067396916e-07	324.570453757754	273.15	8.20215491407774e-06
Men. 5 (Diatom)	Hulburt (1982)	growth rate	2.76860554994e-07	2.76043744566695e-07	293.629045355888	273.15	1.74702682921271e-05
Microcystis aeruginosa strain NRC-1	Krï¿½ger & Eloff (1978)	growth rate	5.7120453694e-10	5.71153496658472e-10	292.366375583444	273.15	3.06858766753376e-06
Odontella mobiliensis	Hulburt (1982)	growth rate	7e-08	6.99994698566746e-08	298.684119601692	273.15	1.61458027945737e-05
Olisthodiscus luteus clone OLMS	Tomas (1978)	growth rate	1.43590020169e-06	1.37730430966176e-06	290.530390560088	273.15	9.729e-06
Olisthodiscus luteus	Throndsen (1976)	growth rate	9.01702361031e-07	8.92666948528748e-07	284.877219925717	273.15	9.81025559761914e-06
Peridinium sp. strain 1	Barker (1935)	growth rate	8.01842490248e-07	8.01814600729487e-07	294.17342443937	273.15	7.07368511006398e-06
Peridinium sp.	Barker (1935)	growth rate	7.682134197e-07	7.68180383606577e-07	294.026923152882	273.15	7.059e-06
Pernambugia tuberosa strain GeoB*74	Meier et al. (2004)	growth rate	1.24e-07	1.23987979260812e-07	297.446975942309	273.15	3.83841259744061e-06
Phaeodactylum tricornutum clone Pet Pd	Fawley (1984)	growth rate	4.443e-06	4.44299994931031e-06	299.466313146354	273.15	1.71240917827543e-05
Phaeodactylum tricornutum	Ryther (1954)	growth rate	1.61289773249e-06	1.61040064221932e-06	292.635195160165	273.15	3.94492680128331e-06
Planktothrix agardhii	van Liere (1979)	growth rate	1.14891979972e-06	1.14891979971883e-06	308.565587871547	273.15	8.5036126583431e-06
Pleurochrysis carterae	Blankley & Lewin (1976)	growth rate	4.15655736019e-07	4.15653809191918e-07	296.622462236034	273.15	3.783e-06
Proboscia inermis	Boyd et al. (2013)	growth rate	2.88562358386e-06	2.88562352709249e-06	279.598496433067	273.15	3.776e-06
Prochlorococcus marinus eMED4	Johnson et al. (2006)	growth rate	3.08858689291e-07	3.08858214124413e-07	298.93998485145	273.15	5.47242174300537e-06
Prochlorococcus marinus strain MIT9215 (clade 1)	Johnson (2006)	growth rate	1.6e-08	1.5995071577844e-08	295.930240394392	273.15	5.40190165780358e-06
Prochlorococcus marinus strain MIT9215 (clade 1)	Johnson et al. (2006)	growth rate	1.86616447997e-08	1.86552686965076e-08	296.036254846481	273.15	5.41729754068111e-06
Prochlorococcus marinus strain MIT9312 (clade 1)	Johnson (2006)	growth rate	3.75757130491e-07	3.75757130489412e-07	301.310638621139	273.15	7.21935650451799e-06
Prochlorococcus marinus strain MIT9312 (clade 1)	Johnson et al. (2006)	growth rate	3.79609045822e-07	3.79609045820598e-07	301.303313646806	273.15	7.23474766840116e-06
Prochlorococcus marinus strain MIT9313	Zinser et al. (2007)	growth rate	3.87844450398e-07	3.87844450310977e-07	302.713981498752	273.15	5.35914906250776e-06
Prochlorococcus marinus strain MIT9515 (clade 2)	Johnson (2006)	growth rate	3.09787653047e-07	3.09787140595345e-07	298.932971415022	273.15	5.49866459208282e-06
Prochlorococcus marinus strain NATL2A	Zinser et al. (2007)	growth rate	3.22081965054e-07	3.22081216872506e-07	299.04806873178	273.15	5.5338883593543e-06
Prorocentrum gracile	Barker (1935)	growth rate	1.70837557892e-07	1.70837557892e-07	293.115794980537	273.15	8.99439654418873e-06
Prorocentrum minimum	Grzebyk & Berland (1996)	growth rate	1.34332919029e-06	1.34332918450536e-06	301.405908641231	273.15	8.51161124268196e-06
Prorocentrum minimum	Grzebyk and Berland (1996)	growth rate	1.33381537156e-06	1.33381536512968e-06	301.384534576912	273.15	8.5051951588504e-06
Pseudo-nitzschia turgiduloides	Fiala & Oriol (1990)	growth rate	2.84594588491e-06	2.68752347283051e-06	277.276547610532	273.15	5.72956293017758e-06
Pseudopedinella pyriformis	Throndsen (1976)	growth rate	3.04446554244e-06	3.04406173993664e-06	290.577212307755	273.15	1.40423090585537e-05
Pyrodinium bahamense var. compressum	Usup et al. (1994)	growth rate	3.7e-07	3.69999999934037e-07	306.716801254293	273.15	3.08230915728123e-06
Pyrodinium bahamense var. compressum strain PbSA01	Usup et al. (1994)	growth rate	4.166950328e-07	4.16695032740638e-07	306.774596776005	273.15	3.0579409283351e-06
Rhizosolenia fragilissimus	Ignatiades & Smayda (1970)	growth rate	9.92279143566e-08	9.84816580060296e-08	282.66272174508	273.15	8.69851679668479e-06
Rhizosolenia setigera	Hulburt (1982)	growth rate	2.57212619062e-06	2.5720693737232e-06	288.297857396453	273.15	6.495e-06
Rhizosolenia setigera	Hulburt (1982)	growth rate	9.57508552619e-09	9.57333798770184e-09	289.619094400258	273.15	1.41998998317965e-05
Scrippsiella trochoidea strain ScrpMxB	Binder & Anderson (1987)	growth rate	2.9731375669e-06	2.9731375669e-06	295.669200714936	273.15	5.59451031666045e-06
Skeletonema marinoionohrnii complex	Kaeriyama et al. (2011)	growth rate	6.65328152449e-06	6.4253924103162e-06	299.175735489596	273.15	1.85680510064892e-05
Skeletonema tropicum clone fall	Hulburt (1982)	growth rate	4.95580234935e-13	4.95580220178785e-13	287.262196372111	273.15	1.6615e-05
Skeletonema tropicum	Kaeriyama et al. (2011)	growth rate	1.5392311315e-06	1.5280304590476e-06	297.378146049424	273.15	1.63534616878868e-05
Synechococcus sp. strain UV-005, PCC 6311	Krï¿½ger & Eloff (1978)	growth rate	1.34103080514e-10	1.34098081784841e-10	289.271201245068	273.15	3.59346961845552e-06
Thalassiosira pseudonana strain CCMP1011, STX97	Boyd et al. (2013)	growth rate	1.62946518255e-06	1.62946518226254e-06	299.544600958886	273.15	1.37492702261969e-05
Thalassiosira pseudonana strain CCMP1012, SWAN1	Boyd et al. (2013)	growth rate	6.35110645703e-07	6.35110590394571e-07	298.169421109097	273.15	1.71760536979944e-05
Thalassiosira pseudonana strain CCMP1013, W	Boyd et al. (2013)	growth rate	7.81474493535e-07	7.81474493534511e-07	302.657067670579	273.15	2.23890656002223e-05
Thalassiosira pseudonana strain CCMP1014, FCRG66	Boyd et al. (2013)	growth rate	2.63118010333e-06	2.63118010333e-06	303.81014321475	273.15	1.9035944523056e-05
Thalassiosira pseudonana strain CCMP1015, ARC5	Boyd et al. (2013)	growth rate	2.95134521879e-06	2.95134521877655e-06	304.114508575579	273.15	1.83244214165238e-05
Thalassiosira pseudonana	Thompson et al. (1992)	growth rate	2.17432673925e-06	2.17002185720557e-06	298.463205735385	273.15	2.09368988619155e-05
Thalassiosira rotula strain CCAP1085_21	Boyd et al. (2013)	growth rate	1.58086347939e-06	1.52774941079324e-06	286.733427872389	273.15	8.97838955918529e-06
Thalassiosira rotula strain CCMP3096	Boyd et al. (2013)	growth rate	2.25278566296e-06	2.09545360443215e-06	285.456439371157	273.15	8.10412469389285e-06
Thalassiosira rotula strain CCMP3264	Boyd et al. (2013)	growth rate	7.8581121513e-07	7.56464605193905e-07	282.991302016559	273.15	9.27428104812437e-06
Thalassiosira rotula strain JpnTR18	Boyd et al. (2013)	growth rate	2.698e-06	2.36338707433035e-06	282.412378356017	273.15	7.44632670645745e-06
Thalassiosira rotula	Baars (1981)	growth rate	1.4238917413e-06	1.37139734295688e-06	279.745095163785	273.15	1.75082986296296e-05
Trichodesmium erythraeum strain 21_75	Boyd et al. (2013)	growth rate	4.99310649934e-10	4.99309505417566e-10	297.652507814097	273.15	3.10353681034329e-06
Trichodesmium erythraeum strain KO4_20	Boyd et al. (2013)	growth rate	2.62643978889e-09	2.62643699717994e-09	299.074653348203	273.15	3.62462616014971e-06
Trichodesmium radians strain H94	Chappell & Webb (2010)	growth rate	2.71309336714e-13	2.71309336706448e-13	298.661417605787	273.15	4.24985355453996e-06
Akashiwo sanguinea strain BWA	Boyd et al. (2013)	growth rate	9.93915063515e-07	9.93788917596879e-07	300.308275051329	275.65	4.219e-06
Akashiwo sanguinea strain GBB	Boyd et al. (2013)	growth rate	1.26962366443e-06	1.26955745032926e-06	302.229174127367	275.65	4.96365304775722e-06
Akashiwo sanguinea strain RMB	Boyd et al. (2013)	growth rate	7.18483924226e-07	7.18481556976417e-07	300.976806152333	275.65	4.28678859292203e-06
Akashiwo sanguinea strain YRB	Boyd et al. (2013)	growth rate	1.93186997846e-06	1.93186997844471e-06	304.168563769919	275.65	4.7137530652508e-06
Alexandrium minutum	Cannon (1993)	growth rate	3.89895371584e-09	3.8954591460712e-09	286.476433407062	275.65	3.48128133681251e-06
Alexandrium ostenfeldii clone LF-37	Jensen & Moestrup (1997)	growth rate	9.53209275754e-08	9.53156813332334e-08	293.992188190687	275.65	2.54571129428654e-06
Alexandrium ostenfeldii clone LF-37	Jensen and Moestrup (1997)	growth rate	1e-07	9.99916369080971e-08	293.958950448773	275.65	2.50084353891836e-06
Alexandrium tamarense clone GTMP	Watras et al. (1982)	growth rate	4.28956198551e-08	4.2632218238124e-08	283.307325742112	275.65	4.048e-06
Amphidinium klebsii	Morton et al. (1992)	growth rate	9.45233193999e-09	9.45233139579577e-09	301.654309315552	275.65	4.38112832468435e-06
Amphiprora sp.	Hulburt (1982)	growth rate	2.53869845025e-07	2.53867594374575e-07	302.007907133866	275.65	1.01726852130692e-05
Apedinella radians	Throndsen (1976)	growth rate	2.4782696707e-07	2.44719175300038e-07	284.64564993811	275.65	1.386e-05
Biceratium furca	Baek et al. (2008)	growth rate	3.84611317462e-10	3.84594402453286e-10	288.693238145797	275.65	5.57268451237028e-06
Ceratium furca	Baek et al. (2008)	growth rate	4.49048623868e-09	4.48919876269398e-09	289.769146352146	275.65	6.04765805929227e-06
Chaetoceros didymus	Hulburt (1982)	growth rate	3.25274103675e-13	3.25274098266542e-13	286.520469779058	275.65	1.57321963594219e-05
Chaetoceros lorenzianus clone Bushehr	Hulburt (1982)	growth rate	1.437e-06	1.43699984765281e-06	302.421278027879	275.65	1.94180599348604e-05
Chaetoceros sp.	Thomas (1966)	growth rate	1.8570626892e-08	1.8563857995084e-08	292.353882344116	275.65	4.08934864211237e-05
Chattonella marina	Kahn (1998)	growth rate	4.05753954526e-07	4.05172344459127e-07	296.692872875611	275.65	4.96509194201831e-06
Chlamydomonas alpina	Seaburg et al. (1981)	growth rate	1.32809748076e-06	1.32803739839886e-06	287.640464428703	275.65	1.0833e-05
Chlamydomonas reinhardtii	McCombie (1960)	growth rate	1.37134327231e-08	1.3637139078603e-08	289.97951191357	275.65	8.20100039496053e-07
Chlamydomonas subcaudata	Seaburg et al. (1981)	growth rate	4.6461109354e-06	4.64606844438225e-06	288.322572781951	275.65	1.12556325037282e-05
Chlorella MFD1	James et al. (1989)	growth rate	7.46732757889e-07	7.40216090300843e-07	299.358216983828	275.65	2.1358629262291e-06
Chlorella sorokiniana strain CCAP 211/8K, 7-11-05	Sorokin (1960)	growth rate	1.9e-08	1.89999817087118e-08	305.611549974747	275.65	8.01894247157823e-05
Chlorella sp. strain MFD-1	James et al. (1989)	growth rate	5.52710120589e-07	5.4852042228986e-07	299.855702200738	275.65	1.50626089825959e-06
Chrysochromulina polylepis strain B3	Edvardsen (1992)	growth rate	2.4893730649e-06	2.48890902646567e-06	291.556259358935	275.65	1.00283288370771e-05
Chrysochromulina polylepis strain B4	Edvardsen (1992)	growth rate	2.22693234399e-06	2.22684849109171e-06	292.641338499921	275.65	8.6033467758942e-06
Chrysochromulina polylepis strain K	Edvardsen (1992)	growth rate	1.748e-06	1.73915512418824e-06	292.357669586682	275.65	9.92215812439579e-06
Cochlodinium polykrikoides strain KG8-ND14	Yamatogi (2005)	growth rate	3.18750839028e-07	3.18702375017185e-07	301.624339083295	275.65	6.42953650346353e-06
Conticribra guillardii clone 7-15	Guillard & Ryther (1962)	growth rate	3.48585719129e-06	3.33390891281383e-06	285.181509217506	275.65	1.83323085870369e-05
Conticribra weissflogii strain CCMP1053, SA	Boyd et al. (2013)	growth rate	4.83e-07	4.82916291102818e-07	292.241441995725	275.65	8.41706906772823e-06
Cosmarium beatum SVCK 533	Stamenkovi? et al. (2013)	growth rate	2.45037584829e-08	2.44974465784306e-08	293.24435915895	275.65	4.08553484138645e-06
Cosmarium beatum	Stamenkovi? and Hanelt (2013)	growth rate	2.45037584829e-08	2.44974465784306e-08	293.24435915895	275.65	4.08553484138645e-06
Cosmarium crenatum var. boldtianum strain SVCK 561, ASW Wien #07 141	Stamenkovi? et al. (2013)	growth rate	6.39483653356e-07	6.39468255622157e-07	297.584553727163	275.65	3.55149581843405e-06
Cosmarium crenatum	Stamenkovi? and Hanelt (2013)	growth rate	6.39483653356e-07	6.39468255622157e-07	297.584553727163	275.65	3.55149581843405e-06
Cosmarium meneghinii strain SVCK 59, 1927/Praha Ac. A 231	Stamenkovi? et al. (2013)	growth rate	1.74255366715e-07	1.7425322849689e-07	295.208770941005	275.65	7.83780867241775e-06
Cosmarium meneghinii	Stamenkovi? and Hanelt (2013)	growth rate	1.74255366715e-07	1.7425322849689e-07	295.208770941005	275.65	7.83780867241775e-06
Cosmarium punctulatum #571	Stamenkovi? and Hanelt (2013)	growth rate	1.78421089552e-07	1.78416915205698e-07	295.636404208879	275.65	3.5661788867204e-06
Cosmarium punctulatum var. subpunctulatum strain SVCK 571, ASW Wien #07 136	Stamenkovi? et al. (2013)	growth rate	1.78421089552e-07	1.78416915205698e-07	295.636404208879	275.65	3.5661788867204e-06
Crocosphaera watsonii strain 3A	Boyd et al. (2013)	growth rate	2.10394065677e-07	2.10394065676972e-07	305.643157840622	275.65	4.48518097282903e-06
Crocosphaera watsonii strain WH005	Boyd et al. (2013)	growth rate	5.40349501742e-10	5.40345127745487e-10	297.906171158399	275.65	6.06670071951936e-06
Crocosphaera watsonii strain WH84	Boyd et al. (2013)	growth rate	7.02914883248e-13	7.02914858859538e-13	297.051945043874	275.65	5.90036875304761e-06
Cryptomonas marssonii	Butterwick et al. (2005)	growth rate	2.2413855739e-06	1.90599876213242e-06	281.234849261693	275.65	6.47384632684727e-06
Cryptomonas marssonii	Butterwick et al. (2005)	growth rate	2.20178615701e-06	1.86888512785296e-06	281.03651681818	275.65	6.48187080623299e-06
Cryptomonas sp. strain F	Throndsen (1976)	growth rate	4.8556307082e-06	4.85561886199288e-06	298.864374125329	275.65	1.1287e-05
Cylindrotheca closterium	Maddux & Jones (1964)	growth rate	2.8468007579e-07	2.83538829693419e-07	291.271592596962	275.65	6.86779846687481e-06
Dactyliosolen fragilissimus	Ignatiades & Smayda (1970)	growth rate	3.48295032135e-07	3.38726812149404e-07	282.662721897431	275.65	8.69851686105361e-06
Desmodesmus quadricaudatus strain A 119, Greifswald/15	Komï¿½rek & Ruzicka (1969)	growth rate	1.17123933273e-07	1.16447593261507e-07	292.122058055753	275.65	1.42223724158895e-05
Diacronema lutheri strain NEPCC 5	Thompson (1992)	growth rate	2.4303678694e-06	2.4303678694e-06	298.587865682986	275.65	2.51706895593673e-05
Dinobryon divergens	Butterwick et al. (2005)	growth rate	1.75076710355e-06	1.72266969401389e-06	290.139441194616	275.65	5.4329388889412e-06
Dinobryon divergens	Butterwick et al. (2005)	growth rate	1.7467355246e-06	1.71889619743881e-06	290.077790168255	275.65	5.43643212143265e-06
Ditylum brightwellii	Paasche (1968)	growth rate	4.30037375882e-06	4.30030243704117e-06	301.957182920331	275.65	2.07353012913336e-05
Dunaliella sp.	Van Auken & McNulty (1973)	growth rate	4.95850564418e-07	4.9585056441586e-07	308.085482111631	275.65	8.58417871458998e-06
Emiliania huxleyi strain B92/21	Conte et al. (1998)	growth rate	3.16767896521e-06	3.16736413042834e-06	297.44578611964	275.65	1.0988527955595e-05
Emiliania huxleyi strain G1779Ga	Conte et al. (1998)	growth rate	1.84210688336e-06	1.83388837893374e-06	294.303739031231	275.65	1.31791515000748e-05
Emiliania huxleyi strain S. Africa	Conte et al. (1998)	growth rate	9.01618898877e-07	9.01512375785918e-07	298.373699939322	275.65	1.02504819597982e-05
Emiliania huxleyi strain Van556	Conte et al. (1998)	growth rate	5.93892021011e-06	5.93892021011e-06	297.517674681486	275.65	9.64748079243511e-06
Eutreptiella gymnastica	Throndsen (1976)	growth rate	6.06867247002e-06	6.06741425653025e-06	294.915413232383	275.65	1.81208156663409e-05
Fibrocapsa japonica strain CAWR-19	de Boer et al. (2005)	growth rate	8.06411404013e-07	8.06407441902615e-07	301.386627095767	275.65	3.84319472802406e-06
Fibrocapsa japonica strain CCRuG-C13	de Boer et al. (2005)	growth rate	3.72125268849e-07	3.68240861579095e-07	291.998432362929	275.65	4.49462136515023e-06
Fibrocapsa japonica strain CS-332	de Boer et al. (2005)	growth rate	1.07296649764e-07	1.07285022740103e-07	295.56968380758	275.65	4.41723359795276e-06
Gephyrocapsa oceanica strain AB1, CAWPOT	Conte et al. (1998)	growth rate	1.61080875778e-06	1.61045171329027e-06	299.217079747984	275.65	1.10067568899687e-05
Gephyrocapsa oceanica var. typica strain A4725	Bollmann et al. (2010)	growth rate	7.36290725689e-07	7.36099521613854e-07	300.026313551215	275.65	1.46018963146836e-05
Gephyrocapsa oceanica var. typica strain A4727	Bollmann et al. (2010)	growth rate	6.16e-07	6.15692028641133e-07	299.121100355011	275.65	1.4484903983093e-05
Gymnodinium isolate 582 (probably G. simplex)	Thomas (1966)	growth rate	6.94075447435e-07	6.9406054202587e-07	299.956458539656	275.65	1.32949473583582e-05
Gymnodinium sp. isolate 581 (probably G. simplex)	Thomas (1966)	growth rate	6.71463804724e-07	6.71404671048291e-07	301.351454767722	275.65	8.91206531302603e-06
Gyrodinium uncatenum strain GYRO	Anderson (1985)	growth rate	1.56718697909e-07	1.55866677014816e-07	294.038258722315	275.65	5.242e-06
Heterocapsa rotundata	Throndsen (1976)	growth rate	5.101e-06	5.10099076336054e-06	296.58970877371	275.65	1.82407092698692e-05
Heteromastix pyriformis	Throndsen (1976)	growth rate	5.1080613558e-06	5.1080611493417e-06	295.802326975364	275.65	1.85767175924153e-05
Karenia brevis strain APA	McKay et al. (2006)	growth rate	3.87742979671e-08	3.87726688000355e-08	296.187044225162	275.65	2.52244846380917e-06
Leonella granifera strain GeoB*39	Meier et al. (2004)	growth rate	6.97441734658e-10	6.97433953012777e-10	294.665855640607	275.65	4.51426243637722e-06
Leonella granifera	Meier et al. (2004)	growth rate	3.11414688949e-09	3.11411321207733e-09	296.192239382191	275.65	4.77831014858715e-06
Leptocylindrus danicus	Hulburt (1982)	growth rate	8.22246613403e-08	8.22244760680613e-08	299.356089806909	275.65	1.9899e-05
Mastigocladus laminosus strain NZ-86-m	Miyamoto et al. (1979)	growth rate	4.32714350085e-07	4.32714350035358e-07	324.570453675892	275.65	8.20215487826778e-06
Men. 5 (Diatom)	Hulburt (1982)	growth rate	5.06682991498e-07	5.03506136722697e-07	293.629025765114	275.65	1.74702641312728e-05
Microcystis aeruginosa strain NRC-1	Krï¿½ger & Eloff (1978)	growth rate	1.92477161046e-09	1.92414918733055e-09	292.366374752435	275.65	3.06858757346606e-06
Odontella mobiliensis	Hulburt (1982)	growth rate	1.34256506788e-07	1.34252954760405e-07	298.68411892074	275.65	1.61458025847435e-05
Olisthodiscus luteus clone OLMS	Tomas (1978)	growth rate	2.0807054106e-06	1.9470202886317e-06	290.530391069778	275.65	9.729e-06
Olisthodiscus luteus	Throndsen (1976)	growth rate	1.75720815499e-06	1.70960599778221e-06	284.877219925717	275.65	9.81025559761937e-06
Peridinium sp. strain 1	Barker (1935)	growth rate	1.13805699809e-06	1.13791135076919e-06	294.1734244816	275.65	7.07368512926356e-06
Peridinium sp.	Barker (1935)	growth rate	1.1e-06	1.09982915859642e-06	294.026922415847	275.65	7.059e-06
Pernambugia tuberosa strain GeoB*74	Meier et al. (2004)	growth rate	1.95867155038e-07	1.95814187489634e-07	297.446970727912	275.65	3.83841198890945e-06
Phaeodactylum tricornutum clone Pet Pd	Fawley (1984)	growth rate	5.26916276983e-06	5.26916237289014e-06	299.466313126426	275.65	1.71240918150568e-05
Phaeodactylum tricornutum	Ryther (1954)	growth rate	1.95729456096e-06	1.94999643206629e-06	292.63519507904	275.65	3.94492680621673e-06
Planktothrix agardhii	van Liere (1979)	growth rate	1.37653180058e-06	1.37653180056753e-06	308.565587873898	275.65	8.50361265353309e-06
Pleurochrysis carterae	Blankley & Lewin (1976)	growth rate	5.68949035402e-07	5.68938258356675e-07	296.622462184005	275.65	3.783e-06
Proboscia inermis	Boyd et al. (2013)	growth rate	3.338e-06	3.33792957973942e-06	279.598497358537	275.65	3.776e-06
Prochlorococcus marinus eMED4	Johnson et al. (2006)	growth rate	4.4364954688e-07	4.43646759353486e-07	298.939985100074	275.65	5.47242166782158e-06
Prochlorococcus marinus strain MIT9215 (clade 1)	Johnson (2006)	growth rate	3.37819561606e-08	3.3754994190766e-08	295.930256830462	275.65	5.40190250112465e-06
Prochlorococcus marinus strain MIT9215 (clade 1)	Johnson et al. (2006)	growth rate	3.86285657668e-08	3.85949202145337e-08	296.036224300799	275.65	5.41729613377287e-06
Prochlorococcus marinus strain MIT9312 (clade 1)	Johnson (2006)	growth rate	5.19449899076e-07	5.19449899048124e-07	301.31063866013	275.65	7.21935649424025e-06
Prochlorococcus marinus strain MIT9312 (clade 1)	Johnson et al. (2006)	growth rate	5.2430235896e-07	5.24302358935079e-07	301.30331325636	275.65	7.23474729994477e-06
Prochlorococcus marinus strain MIT9313	Zinser et al. (2007)	growth rate	5.13580164792e-07	5.13580163884911e-07	302.713981332368	275.65	5.35914877428704e-06
Prochlorococcus marinus strain MIT9515 (clade 2)	Johnson (2006)	growth rate	4.45189750631e-07	4.45186764803289e-07	298.932972193929	275.65	5.49866481493097e-06
Prochlorococcus marinus strain NATL2A	Zinser et al. (2007)	growth rate	4.60837466261e-07	4.60833301337039e-07	299.048070623865	275.65	5.53388883075713e-06
Prorocentrum gracile	Barker (1935)	growth rate	2.94595468631e-07	2.94595468631e-07	293.115794992115	275.65	8.9943965591407e-06
Prorocentrum minimum	Grzebyk & Berland (1996)	growth rate	1.66221444811e-06	1.66221440196414e-06	301.405908822575	275.65	8.51161125609778e-06
Prorocentrum minimum	Grzebyk and Berland (1996)	growth rate	1.65206643743e-06	1.6520663865761e-06	301.38453432091	275.65	8.50519526505654e-06
Pseudo-nitzschia turgiduloides	Fiala & Oriol (1990)	growth rate	6.65025789174e-06	4.99665042666852e-06	277.276547595247	275.65	5.72956292539872e-06
Pseudopedinella pyriformis	Throndsen (1976)	growth rate	4.16368934201e-06	4.16155971626421e-06	290.577212307755	275.65	1.40423090585572e-05
Pyrodinium bahamense var. compressum	Usup et al. (1994)	growth rate	4.53866577169e-07	4.53866576649074e-07	306.716801043745	275.65	3.08230903402062e-06
Pyrodinium bahamense var. compressum strain PbSA01	Usup et al. (1994)	growth rate	5.05e-07	5.04999999530408e-07	306.77459674516	275.65	3.05794092850466e-06
Rhizosolenia fragilissimus	Ignatiades & Smayda (1970)	growth rate	3.48295032135e-07	3.38726812149404e-07	282.662721897431	275.65	8.69851686105361e-06
Rhizosolenia setigera	Hulburt (1982)	growth rate	3.21628039091e-06	3.21582839417914e-06	288.297858684096	275.65	6.495e-06
Rhizosolenia setigera	Hulburt (1982)	growth rate	3.2441154151e-08	3.24177964303807e-08	289.619094794295	275.65	1.41998998154694e-05
Scrippsiella trochoidea strain ScrpMxB	Binder & Anderson (1987)	growth rate	3.2392064113e-06	3.2392064113e-06	295.66920025054	275.65	5.59451047151178e-06
Skeletonema marinoionohrnii complex	Kaeriyama et al. (2011)	growth rate	7.95923001915e-06	7.57851614960022e-06	299.175741419247	275.65	1.85680511308435e-05
Skeletonema menzelii	Kaeriyama et al. (2011)	growth rate	2.28315380825e-06	2.27542939581806e-06	298.03084342249	275.65	2.36137711864618e-05
Skeletonema tropicum clone fall	Hulburt (1982)	growth rate	1.21783006875e-11	1.21782917750201e-11	287.26245850508	275.65	1.6615263059362e-05
Skeletonema tropicum	Kaeriyama et al. (2011)	growth rate	2.15647624305e-06	2.12949615273946e-06	297.378146049424	275.65	1.63534616878868e-05
Synechococcus sp. strain UV-005, PCC 6311	Krï¿½ger & Eloff (1978)	growth rate	7.04843164192e-10	7.04705081488064e-10	289.271188301804	275.65	3.59347027446746e-06
Thalassiosira pseudonana strain CCMP1011, STX97	Boyd et al. (2013)	growth rate	2.10333966082e-06	2.10333965707598e-06	299.544600353015	275.65	1.37492695009358e-05
Thalassiosira pseudonana strain CCMP1012, SWAN1	Boyd et al. (2013)	growth rate	9.62304802432e-07	9.62304316756949e-07	298.169420404127	275.65	1.71760534690725e-05
Thalassiosira pseudonana strain CCMP1013, W	Boyd et al. (2013)	growth rate	1.10747450547e-06	1.10747450546053e-06	302.65706776685	275.65	2.23890654481123e-05
Thalassiosira pseudonana strain CCMP1014, FCRG66	Boyd et al. (2013)	growth rate	3.21061309577e-06	3.21061309576995e-06	303.810143215778	275.65	1.90359445407714e-05
Thalassiosira pseudonana strain CCMP1015, ARC5	Boyd et al. (2013)	growth rate	3.56043847961e-06	3.56043847944389e-06	304.114509353024	275.65	1.83244220521275e-05
Thalassiosira pseudonana	Thompson et al. (1992)	growth rate	2.98290737528e-06	2.97144007372139e-06	298.463203085081	275.65	2.09368989123274e-05
Thalassiosira rotula strain CCAP1085_21	Boyd et al. (2013)	growth rate	2.4783112554e-06	2.32456926290601e-06	286.733427872389	275.65	8.9783895591854e-06
Thalassiosira rotula strain CCMP3096	Boyd et al. (2013)	growth rate	3.33917205034e-06	2.95646394965457e-06	285.456439371157	275.65	8.10412469389286e-06
Thalassiosira rotula strain CCMP3264	Boyd et al. (2013)	growth rate	1.65e-06	1.51301956095421e-06	282.991301979905	275.65	9.274281042568e-06
Thalassiosira rotula strain JpnTR18	Boyd et al. (2013)	growth rate	4.125e-06	3.31832425353153e-06	282.412378356017	275.65	7.4463267064525e-06
Thalassiosira rotula	Baars (1981)	growth rate	4.30235173925e-06	3.79294260533187e-06	279.745095328358	275.65	1.7508298772531e-05
Trichodesmium erythraeum strain 21_75	Boyd et al. (2013)	growth rate	1.39559635994e-09	1.39558298277206e-09	297.652508657984	275.65	3.10353683567538e-06
Trichodesmium erythraeum strain KO4_20	Boyd et al. (2013)	growth rate	6e-09	5.9999731063523e-09	299.074650082596	275.65	3.62462536993154e-06
Trichodesmium radians strain H94	Chappell & Webb (2010)	growth rate	1.67996282849e-12	1.6799628278725e-12	298.661417605787	275.65	4.24985355468584e-06
Akashiwo sanguinea strain BWA	Boyd et al. (2013)	growth rate	1.23343465116e-06	1.23301676296096e-06	300.30827566904	278.15	4.219e-06
Akashiwo sanguinea strain GBB	Boyd et al. (2013)	growth rate	1.53315880876e-06	1.53293977009254e-06	302.229173202165	278.15	4.96365309804123e-06
Akashiwo sanguinea strain RMB	Boyd et al. (2013)	growth rate	9.14208295583e-07	9.1419669657158e-07	300.976806204331	278.15	4.2867885943527e-06
Akashiwo sanguinea strain YRB	Boyd et al. (2013)	growth rate	2.13956467714e-06	2.13956467694369e-06	304.168563742386	278.15	4.71375307243421e-06
Alexandrium minutum	Cannon (1993)	growth rate	2.0056124051e-08	1.99611240117541e-08	286.476432805336	278.15	3.48128005480237e-06
Alexandrium ostenfeldii clone LF-37	Jensen & Moestrup (1997)	growth rate	1.6861942359e-07	1.68581308826533e-07	293.99218870775	278.15	2.54571131630259e-06
Alexandrium ostenfeldii clone LF-37	Jensen and Moestrup (1997)	growth rate	1.75555772656e-07	1.75498874390598e-07	293.958950254672	278.15	2.50084353682119e-06
Alexandrium tamarense clone GTMP	Watras et al. (1982)	growth rate	2.1e-07	2.03186171249496e-07	283.307327712346	278.15	4.048e-06
Amphidinium klebsii	Morton et al. (1992)	growth rate	1.92368798431e-08	1.92368735453903e-08	301.654308556272	278.15	4.38112773236512e-06
Amphiprora sp.	Hulburt (1982)	growth rate	3.97413605427e-07	3.97401930818802e-07	302.00789992883	278.15	1.01726825512211e-05
Apedinella radians	Throndsen (1976)	growth rate	8.16385280752e-07	7.82007119634508e-07	284.64564993811	278.15	1.386e-05
Biceratium furca	Baek et al. (2008)	growth rate	2.65932496723e-09	2.65846475032154e-09	288.693237259744	278.15	5.57268405891953e-06
Ceratium furca	Baek et al. (2008)	growth rate	1.78741378376e-08	1.78510876185853e-08	289.769144348989	278.15	6.04765743513622e-06
Chaetoceros didymus	Hulburt (1982)	growth rate	2.17833814994e-11	2.1783356273509e-11	286.520469227682	278.15	1.57321950985124e-05
Chaetoceros gracilis	Thompson et al. (1992)	growth rate	2.22060100327e-06	2.18142399334495e-06	291.62274046841	278.15	1.86132199071393e-05
Chaetoceros lorenzianus clone Bushehr	Hulburt (1982)	growth rate	1.96725645455e-06	1.96725538945922e-06	302.421279480283	278.15	1.94180584406265e-05
Chaetoceros sp.	Thomas (1966)	growth rate	6.31737201429e-08	6.30937945131635e-08	292.353880163326	278.15	4.08934831246089e-05
Chattonella marina	Kahn (1998)	growth rate	6.08457999043e-07	6.06462384014417e-07	296.692872875611	278.15	4.96509194203622e-06
Chlamydomonas alpina	Seaburg et al. (1981)	growth rate	2.36692995819e-06	2.36600467426365e-06	287.640464419976	278.15	1.0833e-05
Chlamydomonas reinhardtii	McCombie (1960)	growth rate	3.1e-08	3.05608846544678e-08	289.979513720469	278.15	8.20100092266848e-07
Chlamydomonas subcaudata	Seaburg et al. (1981)	growth rate	5.96425859819e-06	5.9636736548511e-06	288.322572725503	278.15	1.12556324843508e-05
Chlorella MFD1	James et al. (1989)	growth rate	9.06093189723e-07	8.92646965084193e-07	299.358256580003	278.15	2.13586265400086e-06
Chlorella sorokiniana strain CCAP 211/8K, 7-11-05	Sorokin (1960)	growth rate	4.33013409539e-08	4.3301192506255e-08	305.611554466773	278.15	8.01894316140292e-05
Chlorella sp. strain MFD-1	James et al. (1989)	growth rate	6.63539308721e-07	6.54931441631402e-07	299.855706879645	278.15	1.50626087902522e-06
Chrysochromulina polylepis strain B3	Edvardsen (1992)	growth rate	3.41871960275e-06	3.41609847228653e-06	291.556259357164	278.15	1.00283288561972e-05
Chrysochromulina polylepis strain B4	Edvardsen (1992)	growth rate	2.95210910166e-06	2.9515711547978e-06	292.641339159628	278.15	8.60334734877713e-06
Chrysochromulina polylepis strain K	Edvardsen (1992)	growth rate	2.5601079469e-06	2.53057506717936e-06	292.357669586682	278.15	9.92215812439576e-06
Cochlodinium polykrikoides strain KG8-ND14	Yamatogi (2005)	growth rate	4.68221054235e-07	4.68042895744518e-07	301.62434020475	278.15	6.42953664570175e-06
Conticribra guillardii clone 7-15	Guillard & Ryther (1962)	growth rate	6.377e-06	5.77325714408771e-06	285.181509118212	278.15	1.83323085602105e-05
Conticribra weissflogii strain CCMP1053, SA	Boyd et al. (2013)	growth rate	8.45224210777e-07	8.44647432070741e-07	292.241441353417	278.15	8.41706798154214e-06
Cosmarium beatum SVCK 533	Stamenkovi? et al. (2013)	growth rate	5.78333899607e-08	5.77820488321897e-08	293.244359182774	278.15	4.0855348552098e-06
Cosmarium beatum	Stamenkovi? and Hanelt (2013)	growth rate	5.78333899607e-08	5.77820488321897e-08	293.244359182774	278.15	4.0855348552098e-06
Cosmarium crenatum var. boldtianum strain SVCK 561, ASW Wien #07 141	Stamenkovi? et al. (2013)	growth rate	8.39082988856e-07	8.39009102740517e-07	297.584553703541	278.15	3.55149582135415e-06
Cosmarium crenatum	Stamenkovi? and Hanelt (2013)	growth rate	8.39082988856e-07	8.39009102740517e-07	297.584553703541	278.15	3.55149582135415e-06
Cosmarium meneghinii strain SVCK 59, 1927/Praha Ac. A 231	Stamenkovi? et al. (2013)	growth rate	3.19877740552e-07	3.19859540637656e-07	295.208770842346	278.15	7.83780876905045e-06
Cosmarium meneghinii	Stamenkovi? and Hanelt (2013)	growth rate	3.19877740552e-07	3.19859540637656e-07	295.208770842346	278.15	7.83780876905045e-06
Cosmarium punctulatum #571	Stamenkovi? and Hanelt (2013)	growth rate	2.89356919235e-07	2.89328980312614e-07	295.636404377587	278.15	3.56617885645671e-06
Cosmarium punctulatum var. subpunctulatum strain SVCK 571, ASW Wien #07 136	Stamenkovi? et al. (2013)	growth rate	2.89356919235e-07	2.89328980312614e-07	295.636404377587	278.15	3.56617885645671e-06
Crocosphaera watsonii strain 3A	Boyd et al. (2013)	growth rate	2.87709581998e-07	2.87709581997414e-07	305.64315784057	278.15	4.48518097318958e-06
Crocosphaera watsonii strain WH005	Boyd et al. (2013)	growth rate	1.75166512147e-09	1.75160701549505e-09	297.906171705832	278.15	6.06670206766e-06
Crocosphaera watsonii strain WH84	Boyd et al. (2013)	growth rate	5.28183265481e-12	5.28183109286734e-12	297.051945043874	278.15	5.90036874703917e-06
Cryptomonas marssonii	Butterwick et al. (2005)	growth rate	4.37979121854e-06	3.15929157385147e-06	281.234849328048	278.15	6.47384633103053e-06
Cryptomonas marssonii	Butterwick et al. (2005)	growth rate	4.41613978881e-06	3.15431763702628e-06	281.036516813361	278.15	6.48187080376762e-06
Cryptomonas sp. strain F	Throndsen (1976)	growth rate	5.54179193885e-06	5.54173162285224e-06	298.864374125329	278.15	1.1287e-05
Cylindrotheca closterium	Maddux & Jones (1964)	growth rate	5.38423464224e-07	5.33017019967131e-07	291.27159259479	278.15	6.86779846892823e-06
Dactyliosolen fragilissimus	Ignatiades & Smayda (1970)	growth rate	1.19524806623e-06	1.08379193807734e-06	282.66272188353	278.15	8.69851685734283e-06
Desmodesmus quadricaudatus strain A 119, Greifswald/15	Komï¿½rek & Ruzicka (1969)	growth rate	2.5813468123e-07	2.54772727784988e-07	292.122052920318	278.15	1.42223711854264e-05
Diacronema lutheri strain NEPCC 5	Thompson (1992)	growth rate	3.24006366361e-06	3.24006366361e-06	298.58206627745	278.15	2.51875648117615e-05
Dinobryon divergens	Butterwick et al. (2005)	growth rate	2.42879774507e-06	2.34845241401619e-06	290.139441293056	278.15	5.4329388923482e-06
Dinobryon divergens	Butterwick et al. (2005)	growth rate	2.42771599995e-06	2.34762020719945e-06	290.07779015994	278.15	5.43643212456785e-06
Ditylum brightwellii	Paasche (1968)	growth rate	5.31562545128e-06	5.31535103357322e-06	301.957182705882	278.15	2.073530127655e-05
Dunaliella sp.	Van Auken & McNulty (1973)	growth rate	6.53e-07	6.52999999973685e-07	308.085482145179	278.15	8.58417871644044e-06
Emiliania huxleyi strain B92/21	Conte et al. (1998)	growth rate	3.91463373223e-06	3.91342898842643e-06	297.445786366925	278.15	1.09885281378537e-05
Emiliania huxleyi strain G1779Ga	Conte et al. (1998)	growth rate	2.68643862955e-06	2.66076622153387e-06	294.303738195477	278.15	1.31791514858784e-05
Emiliania huxleyi strain S. Africa	Conte et al. (1998)	growth rate	1.29556570816e-06	1.29512077521858e-06	298.373700708547	278.15	1.02504821685003e-05
Emiliania huxleyi strain Van556	Conte et al. (1998)	growth rate	6.35437665574e-06	6.35437665574e-06	297.517674685186	278.15	9.64748082220927e-06
Eutreptiella gymnastica	Throndsen (1976)	growth rate	7.53569619297e-06	7.53068021829084e-06	294.915413101768	278.15	1.81208156447803e-05
Fibrocapsa japonica strain CAWR-19	de Boer et al. (2005)	growth rate	9.96211967451e-07	9.96194247456363e-07	301.386627063519	278.15	3.84319473133329e-06
Fibrocapsa japonica strain CCRuG-C13	de Boer et al. (2005)	growth rate	6.13564483507e-07	6.00412648311798e-07	291.998429840035	278.15	4.49462131264286e-06
Fibrocapsa japonica strain CS-332	de Boer et al. (2005)	growth rate	1.93207546334e-07	1.93136818252698e-07	295.569684017463	278.15	4.41723360380597e-06
Gephyrocapsa oceanica strain AB1, CAWPOT	Conte et al. (1998)	growth rate	2.15083150549e-06	2.14958662220958e-06	299.217082123375	278.15	1.10067573986848e-05
Gephyrocapsa oceanica var. typica strain A4725	Bollmann et al. (2010)	growth rate	1.10555561083e-06	1.10484029651419e-06	300.02631858593	278.15	1.46018978182314e-05
Gephyrocapsa oceanica var. typica strain A4727	Bollmann et al. (2010)	growth rate	9.5753546024e-07	9.56392904382466e-07	299.121102525091	278.15	1.44849042027079e-05
Gymnodinium isolate 582 (probably G. simplex)	Thomas (1966)	growth rate	1.03351061417e-06	1.03343750085326e-06	299.956458539656	278.15	1.32949473583551e-05
Gymnodinium sp. isolate 581 (probably G. simplex)	Thomas (1966)	growth rate	9.43803840521e-07	9.43581519901653e-07	301.351454147492	278.15	8.9120647842755e-06
Gyrodinium uncatenum strain GYRO	Anderson (1985)	growth rate	2.80165001021e-07	2.76964160730955e-07	294.038258054963	278.15	5.242e-06
Heterocapsa rotundata	Throndsen (1976)	growth rate	6.29387844676e-06	6.29381710186904e-06	296.589708676209	278.15	1.82407094046313e-05
Heteromastix pyriformis	Throndsen (1976)	growth rate	6.31118572041e-06	6.31118331001931e-06	295.802326975364	278.15	1.8576717592415e-05
Karenia brevis strain APA	McKay et al. (2006)	growth rate	7.28750557335e-08	7.28637509180429e-08	296.18704391346	278.15	2.52244848140541e-06
Leonella granifera strain GeoB*39	Meier et al. (2004)	growth rate	2.53243394333e-09	2.53229563920059e-09	294.665856528489	278.15	4.51426376885936e-06
Leonella granifera	Meier et al. (2004)	growth rate	8.7261097123e-09	8.72569440424662e-09	296.192240554098	278.15	4.77831022104387e-06
Leptocylindrus danicus	Hulburt (1982)	growth rate	1.65832210585e-07	1.65830575952833e-07	299.356089806909	278.15	1.9899e-05
Mastigocladus laminosus strain NZ-86-m	Miyamoto et al. (1979)	growth rate	5.28682938657e-07	5.28682938419531e-07	324.570452978531	278.15	8.20215473588129e-06
Men. 5 (Diatom)	Hulburt (1982)	growth rate	9.17266630779e-07	9.05252314408747e-07	293.629030377394	278.15	1.74702650482485e-05
Microcystis aeruginosa strain NRC-1	Krï¿½ger & Eloff (1978)	growth rate	6.34576585192e-09	6.33851349857754e-09	292.366376934983	278.15	3.06858781715357e-06
Odontella mobiliensis	Hulburt (1982)	growth rate	2.54337888717e-07	2.54314905419599e-07	298.684119595383	278.15	1.61458027728739e-05
Olisthodiscus luteus clone OLMS	Tomas (1978)	growth rate	2.995e-06	2.6985314433093e-06	290.530391987342	278.15	9.729e-06
Olisthodiscus luteus	Throndsen (1976)	growth rate	3.38356491474e-06	3.14687373226833e-06	284.877219925717	278.15	9.81025559760706e-06
Peridinium sp. strain 1	Barker (1935)	growth rate	1.60511178224e-06	1.6043736141172e-06	294.173424671531	278.15	7.07368513770707e-06
Peridinium sp.	Barker (1935)	growth rate	1.56494179363e-06	1.56408427427185e-06	294.026923395136	278.15	7.059e-06
Pernambugia tuberosa strain GeoB*74	Meier et al. (2004)	growth rate	3.06944538126e-07	3.06717287138194e-07	297.446970433874	278.15	3.83841198775526e-06
Phaeodactylum tricornutum clone Pet Pd	Fawley (1984)	growth rate	6.22987647671e-06	6.22987348121651e-06	299.466313158329	278.15	1.71240917178791e-05
Phaeodactylum tricornutum	Ryther (1954)	growth rate	2.367e-06	2.34613925120005e-06	292.635195144584	278.15	3.94492680366322e-06
Planktothrix agardhii	van Liere (1979)	growth rate	1.6438861517e-06	1.64388615157308e-06	308.565587871547	278.15	8.50361265831999e-06
Pleurochrysis carterae	Blankley & Lewin (1976)	growth rate	7.74394090396e-07	7.74335651943494e-07	296.62246258867	278.15	3.783e-06
Proboscia inermis	Boyd et al. (2013)	growth rate	3.85118510082e-06	3.77582639651055e-06	279.598496337927	278.15	3.776e-06
Prochlorococcus marinus eMED4	Johnson et al. (2006)	growth rate	6.33130223556e-07	6.3311438293646e-07	298.939986477081	278.15	5.47242187236378e-06
Prochlorococcus marinus strain MIT9215 (clade 1)	Johnson (2006)	growth rate	7.037327481e-08	7.02303212176633e-08	295.930251701216	278.15	5.40190227006011e-06
Prochlorococcus marinus strain MIT9215 (clade 1)	Johnson et al. (2006)	growth rate	7.89212490842e-08	7.87490723850473e-08	296.036230132195	278.15	5.41729640433229e-06
Prochlorococcus marinus strain MIT9312 (clade 1)	Johnson (2006)	growth rate	7.13924052006e-07	7.13924051541227e-07	301.31063923234	278.15	7.2193569284537e-06
Prochlorococcus marinus strain MIT9312 (clade 1)	Johnson et al. (2006)	growth rate	7.2e-07	7.19999999579205e-07	301.303313432417	278.15	7.23474727062737e-06
Prochlorococcus marinus strain MIT9313	Zinser et al. (2007)	growth rate	6.76654570399e-07	6.76654561334284e-07	302.713981457424	278.15	5.35914881192216e-06
Prochlorococcus marinus strain MIT9515 (clade 2)	Johnson (2006)	growth rate	6.35616655177e-07	6.35599800764013e-07	298.932971555739	278.15	5.49866458656248e-06
Prochlorococcus marinus strain NATL2A	Zinser et al. (2007)	growth rate	6.55137165721e-07	6.55114685636192e-07	299.048070547204	278.15	5.53388885694428e-06
Prorocentrum gracile	Barker (1935)	growth rate	5.03054341427e-07	5.03054341427e-07	293.115794979488	278.15	8.99439654998987e-06
Prorocentrum minimum	Grzebyk & Berland (1996)	growth rate	2.04893782956e-06	2.04893747492812e-06	301.405908772733	278.15	8.51161127280259e-06
Prorocentrum minimum	Grzebyk and Berland (1996)	growth rate	2.03839730923e-06	2.03839692173059e-06	301.384534560697	278.15	8.50519522053712e-06
Pseudo-nitzschia turgiduloides	Fiala & Oriol (1990)	growth rate	1.5304678346e-05	5.46352223288164e-06	277.276547569247	278.15	5.72956292754873e-06
Pseudopedinella pyriformis	Throndsen (1976)	growth rate	5.66241165371e-06	5.65152224344405e-06	290.577212307755	278.15	1.40423090585571e-05
Pyrodinium bahamense var. compressum	Usup et al. (1994)	growth rate	5.54747613601e-07	5.54747609651881e-07	306.716800937471	278.15	3.08230903662422e-06
Pyrodinium bahamense var. compressum strain PbSA01	Usup et al. (1994)	growth rate	6.1e-07	6.09999996420244e-07	306.774596323052	278.15	3.05794093670538e-06
Rhizosolenia fragilissimus	Ignatiades & Smayda (1970)	growth rate	1.19524855809e-06	1.08379235763464e-06	282.662722382808	278.15	8.69851705202381e-06
Rhizosolenia setigera	Hulburt (1982)	growth rate	4.00562789682e-06	4.00216576337125e-06	288.297857375858	278.15	6.495e-06
Rhizosolenia setigera	Hulburt (1982)	growth rate	1.07528252217e-07	1.07230722301254e-07	289.619092177332	278.15	1.41998953411155e-05
Scrippsiella trochoidea strain ScrpMxB	Binder & Anderson (1987)	growth rate	3.52365304184e-06	3.52365304183994e-06	295.669200145911	278.15	5.59451050548696e-06
Skeletonema marinoionohrnii complex	Kaeriyama et al. (2011)	growth rate	9.49089074432e-06	8.8641026860283e-06	299.17576631368	278.15	1.85680516275204e-05
Skeletonema tropicum clone fall	Hulburt (1982)	growth rate	2.8103345048e-10	2.81028703398062e-10	287.262171790922	278.15	1.6615e-05
Synechococcus sp. strain UV-005, PCC 6311	Krï¿½ger & Eloff (1978)	growth rate	3.59582185197e-09	3.59223068671487e-09	289.2712011692	278.15	3.5934681983427e-06
Thalassiosira pseudonana strain CCMP1011, STX97	Boyd et al. (2013)	growth rate	2.70259424364e-06	2.7025941970753e-06	299.544600330687	278.15	1.37492695056021e-05
Thalassiosira pseudonana strain CCMP1012, SWAN1	Boyd et al. (2013)	growth rate	1.44721151955e-06	1.44720741810531e-06	298.169421028499	278.15	1.71760536833626e-05
Thalassiosira pseudonana strain CCMP1013, W	Boyd et al. (2013)	growth rate	1.5596630746e-06	1.55966307442633e-06	302.657067940358	278.15	2.23890649899415e-05
Thalassiosira pseudonana strain CCMP1014, FCRG66	Boyd et al. (2013)	growth rate	3.903656477e-06	3.90365647699877e-06	303.810143299122	278.15	1.903594431542e-05
Thalassiosira pseudonana strain CCMP1015, ARC5	Boyd et al. (2013)	growth rate	4.28077289445e-06	4.28077289248899e-06	304.114509062608	278.15	1.83244220801568e-05
Thalassiosira rotula strain CCAP1085_21	Boyd et al. (2013)	growth rate	3.854e-06	3.42769169195566e-06	286.733427872389	278.15	8.97838955918524e-06
Thalassiosira rotula strain CCMP3096	Boyd et al. (2013)	growth rate	4.9145674062e-06	4.02502403266807e-06	285.456439371157	278.15	8.10412469389278e-06
Thalassiosira rotula strain CCMP3264	Boyd et al. (2013)	growth rate	3.4186490935e-06	2.82980609142014e-06	282.991301360912	278.15	9.27427942815155e-06
Thalassiosira rotula strain JpnTR18	Boyd et al. (2013)	growth rate	6.25868783373e-06	4.42822196722794e-06	282.412378356112	278.15	7.44632670568418e-06
Thalassiosira rotula	Baars (1981)	growth rate	1.27438979119e-05	8.72442792195092e-06	279.74509552136	278.15	1.7508299050096e-05
Trichodesmium erythraeum strain 21_75	Boyd et al. (2013)	growth rate	3.82934845461e-09	3.82919886451171e-09	297.652511483773	278.15	3.10353714289153e-06
Trichodesmium erythraeum strain KO4_20	Boyd et al. (2013)	growth rate	1.35490264075e-08	1.35487768551392e-08	299.074649929264	278.15	3.62462537388508e-06
Trichodesmium radians strain H94	Chappell & Webb (2010)	growth rate	1.00670134765e-11	1.0067013429853e-11	298.661417605787	278.15	4.24985355468585e-06
Akashiwo sanguinea strain BWA	Boyd et al. (2013)	growth rate	1.52479860816e-06	1.5234439456265e-06	300.30827566904	280.65	4.219e-06
Akashiwo sanguinea strain GBB	Boyd et al. (2013)	growth rate	1.84518620705e-06	1.84447701159077e-06	302.22917723481	280.65	4.9636527563453e-06
Akashiwo sanguinea strain RMB	Boyd et al. (2013)	growth rate	1.15826845056e-06	1.15821320584705e-06	300.976806197477	280.65	4.28678858650119e-06
Akashiwo sanguinea strain YRB	Boyd et al. (2013)	growth rate	2.36528137882e-06	2.36528137641133e-06	304.168563151242	280.65	4.71375329277299e-06
Alexandrium minutum	Cannon (1993)	growth rate	1.00201353043e-07	9.78042389124672e-08	286.476433405059	280.65	3.48128133687359e-06
Alexandrium ostenfeldii clone LF-37	Jensen & Moestrup (1997)	growth rate	2.95266081132e-07	2.9499892026558e-07	293.992187965585	280.65	2.54571098635749e-06
Alexandrium ostenfeldii clone LF-37	Jensen and Moestrup (1997)	growth rate	3.05e-07	3.04626293792897e-07	293.958950209943	280.65	2.50084353400343e-06
Alexandrium tamarense clone GTMP	Watras et al. (1982)	growth rate	9.99615744121e-07	8.49569372893817e-07	283.307324027406	280.65	4.048e-06
Amphidinium klebsii	Morton et al. (1992)	growth rate	3.86573807727e-08	3.86573110033091e-08	301.654308222937	280.65	4.38112771476952e-06
Amphiprora sp.	Hulburt (1982)	growth rate	6.17173996484e-07	6.17115192374919e-07	302.007905176563	280.65	1.01726845725506e-05
Apedinella radians	Throndsen (1976)	growth rate	2.63279902051e-06	2.29167989157613e-06	284.64564993811	280.65	1.386e-05
Biceratium furca	Baek et al. (2008)	growth rate	1.77647716811e-08	1.77240517885718e-08	288.693234880526	280.65	5.57268308762674e-06
Ceratium furca	Baek et al. (2008)	growth rate	6.94176109141e-08	6.9026924982009e-08	289.769146090481	280.65	6.0476579922971e-06
Chaetoceros didymus	Hulburt (1982)	growth rate	1.35354927943e-09	1.35344806772858e-09	286.520468820971	280.65	1.57321943830811e-05
Chaetoceros gracilis strain NEPCC 645	Thompson (1992)	growth rate	3.55e-06	3.38207114310908e-06	290.96905439613	280.65	1.870632702106e-05
Chaetoceros gracilis	Thompson et al. (1992)	growth rate	3.77343889419e-06	3.63185345071903e-06	291.622736540145	280.65	1.86132190682865e-05
Chaetoceros lorenzianus clone Bushehr	Hulburt (1982)	growth rate	2.67822466704e-06	2.67821747412489e-06	302.421279461886	280.65	1.9418058602085e-05
Chaetoceros sp.	Thomas (1966)	growth rate	2.10268939462e-07	2.09367732673836e-07	292.353880834495	280.65	4.0893484121653e-05
Chattonella marina	Kahn (1998)	growth rate	9.05864923374e-07	8.99181753875347e-07	296.692872871137	280.65	4.96509194086471e-06
Chlamydomonas alpina	Seaburg et al. (1981)	growth rate	4.17512895869e-06	4.1615910028778e-06	287.640464411499	280.65	1.0833e-05
Chlamydomonas reinhardtii	McCombie (1960)	growth rate	6.9125167859e-08	6.6704595229373e-08	289.979511612391	280.65	8.20100032965538e-07
Chlamydomonas subcaudata	Seaburg et al. (1981)	growth rate	7.6223859136e-06	7.61470727531021e-06	288.322572759855	280.65	1.12556324917964e-05
Chlorella MFD1	James et al. (1989)	growth rate	1.09567583774e-06	1.06840108230902e-06	299.358212859202	280.65	2.13586295890285e-06
Chlorella sorokiniana strain CCAP 211/8K, 7-11-05	Sorokin (1960)	growth rate	9.73466088838e-08	9.73454470447128e-08	305.611551763763	280.65	8.01894254940758e-05
Chlorella sp. strain MFD-1	James et al. (1989)	growth rate	7.94e-07	7.76605533220493e-07	299.855707248782	280.65	1.50626086692178e-06
Chrysochromulina polylepis strain B3	Edvardsen (1992)	growth rate	4.66855453256e-06	4.65422366147953e-06	291.556259357164	280.65	1.00283288564339e-05
Chrysochromulina polylepis strain B4	Edvardsen (1992)	growth rate	3.89382725139e-06	3.89049031416934e-06	292.641339159437	280.65	8.60334734884878e-06
Chrysochromulina polylepis strain K	Edvardsen (1992)	growth rate	3.72408695655e-06	3.62834515948781e-06	292.357669586682	280.65	9.92215812439565e-06
Cochlodinium polykrikoides strain KG8-ND14	Yamatogi (2005)	growth rate	6.83085809145e-07	6.82446107548774e-07	301.624340403111	280.65	6.42953667891206e-06
Conticribra guillardii clone 7-15	Guillard & Ryther (1962)	growth rate	1.1541e-05	9.33416589174593e-06	285.181509208612	280.65	1.83323085753765e-05
Conticribra weissflogii strain CCMP1053, SA	Boyd et al. (2013)	growth rate	1.46428711507e-06	1.46045315915372e-06	292.241441353417	280.65	8.41706798154216e-06
Cosmarium beatum SVCK 533	Stamenkovi? et al. (2013)	growth rate	1.34425070494e-07	1.34023365221683e-07	293.244359163916	280.65	4.08553484604636e-06
Cosmarium beatum	Stamenkovi? and Hanelt (2013)	growth rate	1.34425070494e-07	1.34023365221683e-07	293.244359163916	280.65	4.08553484604636e-06
Cosmarium crenatum var. boldtianum strain SVCK 561, ASW Wien #07 141	Stamenkovi? et al. (2013)	growth rate	1.09566695918e-06	1.09532224170575e-06	297.584553702087	280.65	3.55149582297256e-06
Cosmarium crenatum	Stamenkovi? and Hanelt (2013)	growth rate	1.09566695918e-06	1.09532224170575e-06	297.584553702087	280.65	3.55149582297256e-06
Cosmarium meneghinii strain SVCK 59, 1927/Praha Ac. A 231	Stamenkovi? et al. (2013)	growth rate	5.80874270581e-07	5.80725180075038e-07	295.208770862899	280.65	7.83780878709425e-06
Cosmarium meneghinii	Stamenkovi? and Hanelt (2013)	growth rate	5.80874270581e-07	5.80725180075038e-07	295.208770862899	280.65	7.83780878709425e-06
Cosmarium punctulatum #571	Stamenkovi? and Hanelt (2013)	growth rate	4.65243628549e-07	4.65062900244422e-07	295.636404273529	280.65	3.56617887751651e-06
Cosmarium punctulatum var. subpunctulatum strain SVCK 571, ASW Wien #07 136	Stamenkovi? et al. (2013)	growth rate	4.65243628549e-07	4.65062900244422e-07	295.636404273529	280.65	3.56617887751651e-06
Crocosphaera watsonii strain 3A	Boyd et al. (2013)	growth rate	3.91249350215e-07	3.91249350203537e-07	305.64315729012	280.65	4.48518072916007e-06
Crocosphaera watsonii strain WH005	Boyd et al. (2013)	growth rate	5.5606752029e-09	5.55993811789933e-09	297.906171705832	280.65	6.06670206900049e-06
Crocosphaera watsonii strain WH84	Boyd et al. (2013)	growth rate	3.82879410771e-11	3.82878481887872e-11	297.051945043874	280.65	5.90036875173326e-06
Cryptomonas marssonii	Butterwick et al. (2005)	growth rate	8.45681784002e-06	4.60523230075533e-06	281.234849334454	280.65	6.47384633314447e-06
Cryptomonas marssonii	Butterwick et al. (2005)	growth rate	8.74833591204e-06	4.63977279185148e-06	281.036516108856	280.65	6.4818717657608e-06
Cryptomonas sp. strain F	Throndsen (1976)	growth rate	6.31e-06	6.30970168324522e-06	298.864374125329	280.65	1.1287e-05
Cylindrotheca closterium	Maddux & Jones (1964)	growth rate	1.00683907902e-06	9.82144667549748e-07	291.27159259706	280.65	6.86779846686208e-06
Dactyliosolen fragilissimus	Ignatiades & Smayda (1970)	growth rate	4.01262156062e-06	2.93775908464133e-06	282.662720983597	280.65	8.69851650801108e-06
Desmodesmus quadricaudatus strain A 119, Greifswald/15	Komï¿½rek & Ruzicka (1969)	growth rate	5.61e-07	5.44900584073811e-07	292.122058255507	280.65	1.42223724682193e-05
Diacronema lutheri strain NEPCC 5	Thompson (1992)	growth rate	4.29744350885e-06	4.29744350885e-06	298.585965447917	280.65	2.51762042670011e-05
Dinobryon divergens	Butterwick et al. (2005)	growth rate	3.34982085897e-06	3.12827346900936e-06	290.139441193471	280.65	5.43293889268166e-06
Dinobryon divergens	Butterwick et al. (2005)	growth rate	3.35445117165e-06	3.13229775560548e-06	290.077790077011	280.65	5.43643212422512e-06
Ditylum brightwellii	Paasche (1968)	growth rate	6.54579852717e-06	6.5447677955762e-06	301.957182354461	280.65	2.07353011888775e-05
Dunaliella sp.	Van Auken & McNulty (1973)	growth rate	8.55738542181e-07	8.55738541871553e-07	308.085482177829	280.65	8.58417869375742e-06
Emiliania huxleyi strain B92/21	Conte et al. (1998)	growth rate	4.81951054491e-06	4.8150112857122e-06	297.445786371955	280.65	1.09885281798813e-05
Emiliania huxleyi strain G1779Ga	Conte et al. (1998)	growth rate	3.89152403562e-06	3.81338342117591e-06	294.303738334455	280.65	1.31791514788261e-05
Emiliania huxleyi strain S. Africa	Conte et al. (1998)	growth rate	1.84965600651e-06	1.84784506107791e-06	298.373699474112	280.65	1.02504812068692e-05
Emiliania huxleyi strain Van556	Conte et al. (1998)	growth rate	6.79071100963e-06	6.79071100962997e-06	297.517674673189	280.65	9.64748077619045e-06
Eutreptiella gymnastica	Throndsen (1976)	growth rate	9.32132938275e-06	9.30183849089617e-06	294.915413181006	280.65	1.81208156593532e-05
Fibrocapsa japonica strain CAWR-19	de Boer et al. (2005)	growth rate	1.22605922393e-06	1.22598206315428e-06	301.386627099387	280.65	3.84319473741983e-06
Fibrocapsa japonica strain CCRuG-C13	de Boer et al. (2005)	growth rate	1.00267952431e-06	9.59595594912241e-07	291.998421736663	280.65	4.49462114339132e-06
Fibrocapsa japonica strain CS-332	de Boer et al. (2005)	growth rate	3.44279463213e-07	3.43863084052161e-07	295.569683389886	280.65	4.41723358680481e-06
Gephyrocapsa oceanica strain AB1, CAWPOT	Conte et al. (1998)	growth rate	2.85714035298e-06	2.85289773030362e-06	299.217077828471	280.65	1.10067565424068e-05
Gephyrocapsa oceanica var. typica strain A4725	Bollmann et al. (2010)	growth rate	1.648e-06	1.64538760084366e-06	300.026312650831	280.65	1.46018970963724e-05
Gephyrocapsa oceanica var. typica strain A4727	Bollmann et al. (2010)	growth rate	1.47671184149e-06	1.472574920778e-06	299.12110263793	280.65	1.44849043722911e-05
Gymnodinium isolate 582 (probably G. simplex)	Thomas (1966)	growth rate	1.52806808191e-06	1.52771950612612e-06	299.956458539656	280.65	1.32949473583408e-05
Gymnodinium sp. isolate 581 (probably G. simplex)	Thomas (1966)	growth rate	1.3185804953e-06	1.31776433755531e-06	301.351454731853	280.65	8.91206538298633e-06
Gyrodinium uncatenum strain GYRO	Anderson (1985)	growth rate	4.95692301704e-07	4.84022674269383e-07	294.03825682507	280.65	5.242e-06
Heterocapsa rotundata	Throndsen (1976)	growth rate	7.73670103337e-06	7.73630713946545e-06	296.589708732503	280.65	1.82407093883784e-05
Heteromastix pyriformis	Throndsen (1976)	growth rate	7.76836010688e-06	7.76833317123605e-06	295.802326975364	280.65	1.8576717592415e-05
Karenia brevis strain APA	McKay et al. (2006)	growth rate	1.35435308727e-07	1.35359547805218e-07	296.187045790718	280.65	2.52244884515861e-06
Leonella granifera strain GeoB*39	Meier et al. (2004)	growth rate	9e-09	8.9976616228996e-09	294.665859030573	280.65	4.51426419601515e-06
Leonella granifera	Meier et al. (2004)	growth rate	2.4e-08	2.39951045396908e-08	296.19224002007	280.65	4.77831016377465e-06
Leptocylindrus danicus	Hulburt (1982)	growth rate	3.30299418082e-07	3.30285545022893e-07	299.356089806909	280.65	1.9899e-05
Mastigocladus laminosus strain NZ-86-m	Miyamoto et al. (1979)	growth rate	6.4363485118e-07	6.43634850075277e-07	324.570453259313	280.65	8.20215463115894e-06
Men. 5 (Diatom)	Hulburt (1982)	growth rate	1.64309511366e-06	1.59904242738853e-06	293.629040326045	280.65	1.74702652414992e-05
Microcystis aeruginosa strain NRC-1	Krï¿½ger & Eloff (1978)	growth rate	2.04812867343e-08	2.04005626784496e-08	292.366375861059	280.65	3.06858770378181e-06
Odontella mobiliensis	Hulburt (1982)	growth rate	4.76368630133e-07	4.7622480449243e-07	298.684119039193	280.65	1.61458029558929e-05
Olisthodiscus luteus clone OLMS	Tomas (1978)	growth rate	4.28325053311e-06	3.64742448789172e-06	290.530403781434	280.65	9.729e-06
Olisthodiscus luteus	Throndsen (1976)	growth rate	6.43956173458e-06	5.36803818079436e-06	284.877219925884	280.65	9.81025559687003e-06
Pavlova lutheri	Thompson et al. (1992)	growth rate	4.52478071243e-06	4.52478071243e-06	298.602342269282	280.65	2.48157889961092e-05
Peridinium sp. strain 1	Barker (1935)	growth rate	2.25e-06	2.24636848977163e-06	294.173424431139	280.65	7.07368510268697e-06
Peridinium sp.	Barker (1935)	growth rate	2.21246907943e-06	2.20829078565559e-06	294.026922000991	280.65	7.059e-06
Pernambugia tuberosa strain GeoB*74	Meier et al. (2004)	growth rate	4.7718031648e-07	4.76231045051665e-07	297.446971812263	280.65	3.83841198290443e-06
Phaeodactylum tricornutum clone Pet Pd	Fawley (1984)	growth rate	7.34381012976e-06	7.34378832405221e-06	299.466313084127	280.65	1.71240918815518e-05
Phaeodactylum tricornutum	Ryther (1954)	growth rate	2.85274331395e-06	2.79461321116075e-06	292.635195104885	280.65	3.94492680369377e-06
Planktothrix agardhii	van Liere (1979)	growth rate	1.957e-06	1.9569999987609e-06	308.565587871547	280.65	8.50361265834283e-06
Pleurochrysis carterae	Blankley & Lewin (1976)	growth rate	1.04825115504e-06	1.04794372449928e-06	296.622462162087	280.65	3.783e-06
Proboscia inermis	Boyd et al. (2013)	growth rate	4.432e-06	2.50243020604513e-07	279.598496416648	280.65	3.776e-06
Prochlorococcus marinus eMED4	Johnson et al. (2006)	growth rate	8.97830267434e-07	8.97742998265675e-07	298.939986488278	280.65	5.47242187543545e-06
Prochlorococcus marinus strain MIT9215 (clade 1)	Johnson (2006)	growth rate	1.44694666886e-07	1.4396026705228e-07	295.930243831439	280.65	5.40190185671506e-06
Prochlorococcus marinus strain MIT9215 (clade 1)	Johnson et al. (2006)	growth rate	1.59202862763e-07	1.58348661111769e-07	296.036234356172	280.65	5.41729658548372e-06
Prochlorococcus marinus strain MIT9312 (clade 1)	Johnson (2006)	growth rate	9.75663017106e-07	9.75663009735697e-07	301.310638594173	280.65	7.2193564682789e-06
Prochlorococcus marinus strain MIT9312 (clade 1)	Johnson et al. (2006)	growth rate	9.83051959866e-07	9.83051953110569e-07	301.303313267242	280.65	7.23474731219384e-06
Prochlorococcus marinus strain MIT9313	Zinser et al. (2007)	growth rate	8.87139933293e-07	8.87139846347042e-07	302.713981445491	280.65	5.35914883169738e-06
Prochlorococcus marinus strain MIT9515 (clade 2)	Johnson (2006)	growth rate	9.01758342302e-07	9.01666096601284e-07	298.932971062205	280.65	5.49866456179496e-06
Prochlorococcus marinus strain NATL2A	Zinser et al. (2007)	growth rate	9.25538872018e-07	9.25421134192152e-07	299.048068835082	280.65	5.53388836963012e-06
Prorocentrum minimum	Grzebyk & Berland (1996)	growth rate	2.51624015864e-06	2.51623753052663e-06	301.405908659405	280.65	8.51161129130718e-06
Prorocentrum minimum	Grzebyk and Berland (1996)	growth rate	2.50567216525e-06	2.50566931747809e-06	301.384534636141	280.65	8.50519521339848e-06
Pseudo-nitzschia turgiduloides	Fiala & Oriol (1990)	growth rate	3.47025059911e-05	3.30114336145053e-06	277.27654766086	280.65	5.72956292289348e-06
Pseudopedinella pyriformis	Throndsen (1976)	growth rate	7.65853568402e-06	7.60465266984075e-06	290.577212307755	280.65	1.4042309058556e-05
Pyrodinium bahamense var. compressum	Usup et al. (1994)	growth rate	6.75631368032e-07	6.75631339100531e-07	306.716801087913	280.65	3.08230902601552e-06
Pyrodinium bahamense var. compressum strain PbSA01	Usup et al. (1994)	growth rate	7.3428420692e-07	7.34284180603777e-07	306.77459668569	280.65	3.05794092730008e-06
Rhizosolenia fragilissimus	Ignatiades & Smayda (1970)	growth rate	4.01262149685e-06	2.93775903211239e-06	282.662720891341	280.65	8.69851646858886e-06
Rhizosolenia setigera	Hulburt (1982)	growth rate	4.96923134371e-06	4.94374853997548e-06	288.297858414302	280.65	6.495e-06
Rhizosolenia setigera	Hulburt (1982)	growth rate	3.48881548368e-07	3.45279785571646e-07	289.619092555425	280.65	1.41998954916628e-05
Scrippsiella trochoidea strain ScrpMxB	Binder & Anderson (1987)	growth rate	3.82733442587e-06	3.82733442586206e-06	295.669200645654	280.65	5.59451033858357e-06
Skeletonema marinoionohrnii complex	Kaeriyama et al. (2011)	growth rate	1.12818724531e-05	1.0266261392232e-05	299.175752625135	280.65	1.85680513599354e-05
Skeletonema menzelii	Kaeriyama et al. (2011)	growth rate	4.6821622358e-06	4.62171177270067e-06	298.0308453048	280.65	2.36137716325445e-05
Skeletonema tropicum clone fall	Hulburt (1982)	growth rate	6.14881904561e-09	6.1465469560208e-09	287.26214329203	280.65	1.6615e-05
Synechococcus sp. strain UV-005, PCC 6311	Krï¿½ger & Eloff (1978)	growth rate	1.78170774875e-08	1.77292482827991e-08	289.27104924669	280.65	3.59344992947897e-06
Thalassiosira pseudonana strain CCMP1011, STX97	Boyd et al. (2013)	growth rate	3.45710568068e-06	3.45710512698366e-06	299.544600351143	280.65	1.37492695089521e-05
Thalassiosira pseudonana strain CCMP1012, SWAN1	Boyd et al. (2013)	growth rate	2.16069780354e-06	2.16066445965705e-06	298.169420536046	280.65	1.71760522272091e-05
Thalassiosira pseudonana strain CCMP1013, W	Boyd et al. (2013)	growth rate	2.18312505951e-06	2.18312505648486e-06	302.657067768543	280.65	2.23890654407905e-05
Thalassiosira pseudonana strain CCMP1014, FCRG66	Boyd et al. (2013)	growth rate	4.72980150899e-06	4.72980150895899e-06	303.810143246763	280.65	1.90359445566637e-05
Thalassiosira pseudonana strain CCMP1015, ARC5	Boyd et al. (2013)	growth rate	5.13e-06	5.1299999778452e-06	304.114508474171	280.65	1.83244214772068e-05
Thalassiosira pseudonana	Thompson et al. (1992)	growth rate	5.51989251207e-06	5.44317024676568e-06	298.463115098492	280.65	2.09368995209351e-05
Thalassiosira rotula strain CCAP1085_21	Boyd et al. (2013)	growth rate	5.94624233835e-06	4.82938131194677e-06	286.733428501875	280.65	8.97839048994467e-06
Thalassiosira rotula strain CCMP3096	Boyd et al. (2013)	growth rate	7.18358902716e-06	5.22923996132489e-06	285.456439371157	280.65	8.10412469389281e-06
Thalassiosira rotula strain CCMP3264	Boyd et al. (2013)	growth rate	6.99182667741e-06	4.75236993368925e-06	282.991301435996	280.65	9.2742794447981e-06
Thalassiosira rotula strain JpnTR18	Boyd et al. (2013)	growth rate	9.42587950592e-06	5.55683168244213e-06	282.412378421754	280.65	7.44632659764385e-06
Thalassiosira rotula	Baars (1981)	growth rate	3.7025157474e-05	1.45419448509375e-05	279.745094792376	280.65	1.75082984171796e-05
Trichodesmium erythraeum strain 21_75	Boyd et al. (2013)	growth rate	1.0319978037e-08	1.03183758157862e-08	297.652509001578	280.65	3.10353688903551e-06
Trichodesmium erythraeum strain KO4_20	Boyd et al. (2013)	growth rate	3.0106342255e-08	3.01041204084542e-08	299.074649968415	280.65	3.62462536758509e-06
Trichodesmium radians strain H94	Chappell & Webb (2010)	growth rate	5.84316373148e-11	5.84316340523294e-11	298.661417605787	280.65	4.24985355468588e-06
Akashiwo sanguinea strain BWA	Boyd et al. (2013)	growth rate	1.87794360803e-06	1.87364618250502e-06	300.30827566904	283.15	4.219e-06
Akashiwo sanguinea strain GBB	Boyd et al. (2013)	growth rate	2.21346270455e-06	2.21121451119193e-06	302.229172962409	283.15	4.96365309891195e-06
Akashiwo sanguinea strain RMB	Boyd et al. (2013)	growth rate	1.46136472082e-06	1.46110877388267e-06	300.976805998141	283.15	4.28678862133021e-06
Akashiwo sanguinea strain YRB	Boyd et al. (2013)	growth rate	2.61018402187e-06	2.61018399359713e-06	304.168563450869	283.15	4.713753182423e-06
Alexandrium minutum	Cannon (1993)	growth rate	4.86590334249e-07	4.33442479999589e-07	286.476433408236	283.15	3.48128133737656e-06
Alexandrium ostenfeldii clone LF-37	Jensen & Moestrup (1997)	growth rate	5.11944765767e-07	5.10138976678452e-07	293.992188460081	283.15	2.54571131535315e-06
Alexandrium ostenfeldii clone LF-37	Jensen and Moestrup (1997)	growth rate	5.24809218181e-07	5.22440396507734e-07	293.958950208102	283.15	2.50084353430972e-06
Alexandrium tamarense clone GTMP	Watras et al. (1982)	growth rate	4.62842159289e-06	2.43183609983601e-06	283.307326943121	283.15	4.048e-06
Amphidinium klebsii	Morton et al. (1992)	growth rate	7.67323164233e-08	7.67315756252585e-08	301.654310241207	283.15	4.38112829296426e-06
Amphiprora sp.	Hulburt (1982)	growth rate	9.51e-07	9.50712190508824e-07	302.007900104257	283.15	1.01726826256764e-05
Apedinella radians	Throndsen (1976)	growth rate	8.31688146699e-06	5.5696003026619e-06	284.645649329597	283.15	1.38599469061249e-05
Biceratium furca	Baek et al. (2008)	growth rate	1.14758551539e-07	1.12978328842681e-07	288.693236178888	283.15	5.57268367878088e-06
Ceratium furca	Baek et al. (2008)	growth rate	2.63213731452e-07	2.57002019496143e-07	289.769145912456	283.15	6.04765795761066e-06
Chaetoceros didymus	Hulburt (1982)	growth rate	7.81911377676e-08	7.78419095150143e-08	286.520469122638	283.15	1.57321950324929e-05
Chaetoceros gracilis strain NEPCC 645	Thompson (1992)	growth rate	6.18752082702e-06	5.60028565395634e-06	290.969049825263	283.15	1.87063238425949e-05
Chaetoceros gracilis	Thompson et al. (1992)	growth rate	6.35240107707e-06	5.86300194622156e-06	291.622749532761	283.15	1.86132197615524e-05
Chaetoceros lorenzianus clone Bushehr	Hulburt (1982)	growth rate	3.62632848799e-06	3.62628152338121e-06	302.421281025239	283.15	1.94180569283602e-05
Chaetoceros sp.	Thomas (1966)	growth rate	6.85160108537e-07	6.75491381417418e-07	292.353883818623	283.15	4.08934888178672e-05
Chattonella marina	Kahn (1998)	growth rate	1.33919653122e-06	1.31739611474892e-06	296.692872875611	283.15	4.96509194203635e-06
Chlamydomonas alpina	Seaburg et al. (1981)	growth rate	7.29124744773e-06	7.10601890863734e-06	287.640464424387	283.15	1.0833e-05
Chlamydomonas reinhardtii	McCombie (1960)	growth rate	1.51906911704e-07	1.39343870960389e-07	289.979512877234	283.15	8.20100066943019e-07
Chlamydomonas subcaudata	Seaburg et al. (1981)	growth rate	9.69938427929e-06	9.60383315474152e-06	288.322572741233	283.15	1.12556325443074e-05
Chlorella MFD1	James et al. (1989)	growth rate	1.32049054431e-06	1.26621675604518e-06	299.358219214527	283.15	2.13586291686323e-06
Chlorella sorokiniana strain CCAP 211/8K, 7-11-05	Sorokin (1960)	growth rate	2.15738937271e-07	2.15730168667794e-07	305.611554030511	283.15	8.01894298362708e-05
Chlorella sp. strain MFD-1	James et al. (1989)	growth rate	9.47109614032e-07	9.12601979970094e-07	299.855703447481	283.15	1.5062608883031e-06
Chrysochromulina polylepis strain B3	Edvardsen (1992)	growth rate	6.34032999463e-06	6.2647958989062e-06	291.556259357164	283.15	1.00283288540313e-05
Chrysochromulina polylepis strain B4	Edvardsen (1992)	growth rate	5.11090283306e-06	5.0909079723927e-06	292.641339176616	283.15	8.60334733982049e-06
Chrysochromulina polylepis strain K	Edvardsen (1992)	growth rate	5.38154810051e-06	5.08264354888259e-06	292.357669586682	283.15	9.92215812439579e-06
Cochlodinium polykrikoides strain KG8-ND14	Yamatogi (2005)	growth rate	9.8992698217e-07	9.87683080673724e-07	301.624340358131	283.15	6.42953666687521e-06
Conticribra guillardii clone 7-15	Guillard & Ryther (1962)	growth rate	2.06692534882e-05	1.35370324465697e-05	285.181510550417	283.15	1.83323114062695e-05
Conticribra weissflogii strain CCMP1053, SA	Boyd et al. (2013)	growth rate	2.51226980957e-06	2.48775293050081e-06	292.241442000327	283.15	8.41706905385958e-06
Cosmarium beatum SVCK 533	Stamenkovi? et al. (2013)	growth rate	3.07831857737e-07	3.0481542364879e-07	293.244359184379	283.15	4.08553484044405e-06
Cosmarium beatum	Stamenkovi? and Hanelt (2013)	growth rate	3.07831857737e-07	3.0481542364879e-07	293.244359184379	283.15	4.08553484044405e-06
Cosmarium crenatum var. boldtianum strain SVCK 561, ASW Wien #07 141	Stamenkovi? et al. (2013)	growth rate	1.424e-06	1.42243572933548e-06	297.584553715742	283.15	3.55149583015575e-06
Cosmarium crenatum	Stamenkovi? and Hanelt (2013)	growth rate	1.424e-06	1.42243572933548e-06	297.584553715742	283.15	3.55149583015575e-06
Cosmarium meneghinii strain SVCK 59, 1927/Praha Ac. A 231	Stamenkovi? et al. (2013)	growth rate	1.04377040709e-06	1.04259440293831e-06	295.208770903082	283.15	7.83780871286251e-06
Cosmarium meneghinii	Stamenkovi? and Hanelt (2013)	growth rate	1.04377040709e-06	1.04259440293831e-06	295.208770903082	283.15	7.83780871286251e-06
Cosmarium punctulatum #571	Stamenkovi? and Hanelt (2013)	growth rate	7.4179686352e-07	7.40666661832798e-07	295.636404363919	283.15	3.56617887067633e-06
Cosmarium punctulatum var. subpunctulatum strain SVCK 571, ASW Wien #07 136	Stamenkovi? et al. (2013)	growth rate	7.4179686352e-07	7.40666661832798e-07	295.636404363919	283.15	3.56617887067633e-06
Crocosphaera watsonii strain 3A	Boyd et al. (2013)	growth rate	5.29170392989e-07	5.29170392776318e-07	305.643157836474	283.15	4.48518098084783e-06
Crocosphaera watsonii strain WH005	Boyd et al. (2013)	growth rate	1.72959781312e-08	1.72870408112354e-08	297.906171705809	283.15	6.0667020458309e-06
Crocosphaera watsonii strain WH84	Boyd et al. (2013)	growth rate	2.68008268279e-10	2.68003128797402e-10	297.051945043898	283.15	5.90036874720372e-06
Cryptomonas marssonii	Butterwick et al. (2005)	growth rate	1.61404101168e-05	5.79320043537331e-06	281.234849368996	283.15	6.47384633580344e-06
Cryptomonas marssonii	Butterwick et al. (2005)	growth rate	1.71224355541e-05	5.83814158321817e-06	281.036516058057	283.15	6.48187176065704e-06
Cryptomonas sp. strain F	Throndsen (1976)	growth rate	7.16833541085e-06	7.1669011834923e-06	298.864374125329	283.15	1.1287e-05
Cylindrotheca closterium	Maddux & Jones (1964)	growth rate	1.86206971174e-06	1.75445862675015e-06	291.27159259706	283.15	6.8677984668617e-06
Dactyliosolen fragilissimus	Ignatiades & Smayda (1970)	growth rate	1.31859264833e-05	5.80145610184e-06	282.662722077366	283.15	8.69851694036786e-06
Desmodesmus quadricaudatus strain A 119, Greifswald/15	Komï¿½rek & Ruzicka (1969)	growth rate	1.20245119147e-06	1.12883135770601e-06	292.122058182922	283.15	1.42223724549832e-05
Diacronema lutheri strain NEPCC 5	Thompson (1992)	growth rate	5.67153843864e-06	5.67153843864e-06	298.585832325364	283.15	2.51765911619174e-05
Dinobryon divergens	Butterwick et al. (2005)	growth rate	4.59394883847e-06	4.01312099340598e-06	290.139441203443	283.15	5.43293889257702e-06
Dinobryon divergens	Butterwick et al. (2005)	growth rate	4.60856162202e-06	4.02304301869375e-06	290.077790109448	283.15	5.43643211905015e-06
Ditylum brightwellii	Paasche (1968)	growth rate	8.03108910876e-06	8.02730783096852e-06	301.957182040609	283.15	2.07353003587729e-05
Dunaliella sp.	Van Auken & McNulty (1973)	growth rate	1.11608573249e-06	1.11608572900607e-06	308.085482205001	283.15	8.58417872993656e-06
Emiliania huxleyi strain B92/21	Conte et al. (1998)	growth rate	5.91180326079e-06	5.89540681068603e-06	297.44578598395	283.15	1.09885278501646e-05
Emiliania huxleyi strain G1779Ga	Conte et al. (1998)	growth rate	5.60041873443e-06	5.36982030906039e-06	294.303738535479	283.15	1.31791515112467e-05
Emiliania huxleyi strain S. Africa	Conte et al. (1998)	growth rate	2.62416994439e-06	2.61698774697649e-06	298.373699474812	283.15	1.02504812103077e-05
Emiliania huxleyi strain Van556	Conte et al. (1998)	growth rate	7.24850149035e-06	7.24850149034498e-06	297.517674678129	283.15	9.64748075529366e-06
Eutreptiella gymnastica	Throndsen (1976)	growth rate	1.14868642324e-05	1.14131382628669e-05	294.915413135897	283.15	1.81208156593097e-05
Fibrocapsa japonica strain CAWR-19	de Boer et al. (2005)	growth rate	1.50341562013e-06	1.50308828013036e-06	301.386627092204	283.15	3.84319473537359e-06
Fibrocapsa japonica strain CCRuG-C13	de Boer et al. (2005)	growth rate	1.62441813781e-06	1.48910536758042e-06	291.998417782455	283.15	4.49462058663701e-06
Fibrocapsa japonica strain CS-332	de Boer et al. (2005)	growth rate	6.07250540817e-07	6.04879291321757e-07	295.569683169302	283.15	4.4172335778305e-06
Gephyrocapsa oceanica strain AB1, CAWPOT	Conte et al. (1998)	growth rate	3.77641059055e-06	3.76228072733632e-06	299.217078800952	283.15	1.10067566803674e-05
Gephyrocapsa oceanica var. typica strain A4725	Bollmann et al. (2010)	growth rate	2.43944209374e-06	2.43012905452829e-06	300.026318680167	283.15	1.46018978186623e-05
Gephyrocapsa oceanica var. typica strain A4727	Bollmann et al. (2010)	growth rate	2.26e-06	2.24538858201174e-06	299.121103048002	283.15	1.44849045249668e-05
Gymnodinium isolate 582 (probably G. simplex)	Thomas (1966)	growth rate	2.24373502024e-06	2.24211890070671e-06	299.956458539656	283.15	1.32949473583582e-05
Gymnodinium sp. isolate 581 (probably G. simplex)	Thomas (1966)	growth rate	1.83133210385e-06	1.82840570744247e-06	301.351454795439	283.15	8.91206525752567e-06
Gyrodinium uncatenum strain GYRO	Anderson (1985)	growth rate	8.68229875138e-07	8.27162777694123e-07	294.038254129487	283.15	5.242e-06
Heterocapsa rotundata	Throndsen (1976)	growth rate	9.47568069258e-06	9.47323362085059e-06	296.589708700661	283.15	1.82407093981045e-05
Heteromastix pyriformis	Throndsen (1976)	growth rate	9.527e-06	9.52671156485553e-06	295.802326975364	283.15	1.8576717592415e-05
Karenia brevis strain APA	McKay et al. (2006)	growth rate	2.49e-07	2.48509470870957e-07	296.187045775308	283.15	2.52244884829852e-06
Leonella granifera strain GeoB*39	Meier et al. (2004)	growth rate	3.11839723689e-08	3.11465013813505e-08	294.665860492927	283.15	4.51426445906198e-06
Leonella granifera	Meier et al. (2004)	growth rate	6.4874944472e-08	6.4819696429829e-08	296.1922372788	283.15	4.7783089002802e-06
Leptocylindrus danicus	Hulburt (1982)	growth rate	6.49924069632e-07	6.49810704298185e-07	299.356089806909	283.15	1.9899e-05
Mastigocladus laminosus strain NZ-86-m	Miyamoto et al. (1979)	growth rate	7.80863054373e-07	7.80863049371379e-07	324.570452990119	283.15	8.2021547156974e-06
Men. 5 (Diatom)	Hulburt (1982)	growth rate	2.91312160218e-06	2.75745227006616e-06	293.629039168031	283.15	1.7470265090167e-05
Microcystis aeruginosa strain NRC-1	Krï¿½ger & Eloff (1978)	growth rate	6.47507871215e-08	6.38953578493871e-08	292.366376795309	283.15	3.06858780476407e-06
Odontella mobiliensis	Hulburt (1982)	growth rate	8.82394766799e-07	8.81523824600942e-07	298.684119367054	283.15	1.61458027348073e-05
Olisthodiscus luteus clone OLMS	Tomas (1978)	growth rate	6.087e-06	4.77653295711626e-06	290.530402008087	283.15	9.729e-06
Olisthodiscus luteus	Throndsen (1976)	growth rate	1.21172169601e-05	7.96820397134797e-06	284.877219925717	283.15	9.81025559761951e-06
Pavlova lutheri	Thompson et al. (1992)	growth rate	5.90628768033e-06	5.90628768033e-06	298.616456411857	283.15	2.47810640009131e-05
Peridinium sp. strain 1	Barker (1935)	growth rate	3.13528032244e-06	3.11795841082474e-06	294.173424222786	283.15	7.07368506628715e-06
Peridinium sp.	Barker (1935)	growth rate	3.10885786567e-06	3.08912289160429e-06	294.026922417647	283.15	7.059e-06
Pernambugia tuberosa strain GeoB*74	Meier et al. (2004)	growth rate	7.36073838522e-07	7.32215275452688e-07	297.446977208218	283.15	3.838412268447e-06
Phaeodactylum tricornutum clone Pet Pd	Fawley (1984)	growth rate	8.63180962586e-06	8.63165636020074e-06	299.46631306553	283.15	1.71240919179813e-05
Phaeodactylum tricornutum	Ryther (1954)	growth rate	3.42688212847e-06	3.27012434625766e-06	292.635195109213	283.15	3.9449268033661e-06
Planktothrix agardhii	van Liere (1979)	growth rate	2.3225179243e-06	2.32251791268034e-06	308.565587871547	283.15	8.5036126583598e-06
Pleurochrysis carterae	Blankley & Lewin (1976)	growth rate	1.41138849462e-06	1.40981885643237e-06	296.622462228021	283.15	3.783e-06
Proboscia inermis	Boyd et al. (2013)	growth rate	5.08770631737e-06	4.09476619872373e-10	279.59849620253	283.15	3.776e-06
Prochlorococcus marinus eMED4	Johnson et al. (2006)	growth rate	1.26536732996e-06	1.264900911068e-06	298.939986252932	283.15	5.47242185246935e-06
Prochlorococcus marinus strain MIT9215 (clade 1)	Johnson (2006)	growth rate	2.93745139556e-07	2.90095888058596e-07	295.930248159667	283.15	5.40190135095612e-06
Prochlorococcus marinus strain MIT9215 (clade 1)	Johnson et al. (2006)	growth rate	3.17194859972e-07	3.13093659478127e-07	296.036241148746	283.15	5.41729692203628e-06
Prochlorococcus marinus strain MIT9312 (clade 1)	Johnson (2006)	growth rate	1.326e-06	1.32599988869219e-06	301.310638599491	283.15	7.21935644789168e-06
Prochlorococcus marinus strain MIT9312 (clade 1)	Johnson et al. (2006)	growth rate	1.33492939818e-06	1.33492929491049e-06	301.303313256623	283.15	7.23474730068079e-06
Prochlorococcus marinus strain MIT9313	Zinser et al. (2007)	growth rate	1.15755137067e-06	1.15755056936133e-06	302.713981618181	283.15	5.35914916428538e-06
Prochlorococcus marinus strain MIT9515 (clade 2)	Johnson (2006)	growth rate	1.27146051292e-06	1.2709706761857e-06	298.93297124325	283.15	5.49866456548501e-06
Prochlorococcus marinus strain NATL2A	Zinser et al. (2007)	growth rate	1.29959285463e-06	1.29899412760531e-06	299.04806889269	283.15	5.53388837495194e-06
Prorocentrum minimum	Grzebyk & Berland (1996)	growth rate	3.07893036697e-06	3.07891156740519e-06	301.405908728414	283.15	8.51161125747175e-06
Prorocentrum minimum	Grzebyk and Berland (1996)	growth rate	3.06885828598e-06	3.06883808180167e-06	301.384534637294	283.15	8.50519518013861e-06
Pseudo-nitzschia turgiduloides	Fiala & Oriol (1990)	growth rate	7.75566901597e-05	1.55802030108244e-06	277.27654760895	283.15	5.7295629222872e-06
Pseudopedinella pyriformis	Throndsen (1976)	growth rate	1.03032498566e-05	1.0047406821027e-05	290.577212307755	283.15	1.40423090585259e-05
Pyrodinium bahamense var. compressum	Usup et al. (1994)	growth rate	8.2e-07	8.19999795369322e-07	306.716800961172	283.15	3.08230903521905e-06
Pyrodinium bahamense var. compressum strain PbSA01	Usup et al. (1994)	growth rate	8.81e-07	8.80999813234688e-07	306.77459665307	283.15	3.05794093021416e-06
Rhizosolenia fragilissimus	Ignatiades & Smayda (1970)	growth rate	1.31859264833e-05	5.80145610184e-06	282.662722077366	283.15	8.69851694036786e-06
Rhizosolenia setigera	Hulburt (1982)	growth rate	6.14121969363e-06	5.96373337749425e-06	288.297858643382	283.15	6.495e-06
Rhizosolenia setigera	Hulburt (1982)	growth rate	1.10868210324e-06	1.06777486577309e-06	289.61909240339	283.15	1.41998955049666e-05
Scrippsiella trochoidea strain ScrpMxB	Binder & Anderson (1987)	growth rate	4.15112372799e-06	4.15112372706602e-06	295.669200779091	283.15	5.59451032037454e-06
Skeletonema marinoionohrnii complex	Kaeriyama et al. (2011)	growth rate	1.33699401904e-05	1.17529306356306e-05	299.175777768543	283.15	1.8568051842927e-05
Skeletonema tropicum clone fall	Hulburt (1982)	growth rate	1.27456095719e-07	1.26486731294596e-07	287.262240461806	283.15	1.66150519053587e-05
Skeletonema tropicum	Kaeriyama et al. (2011)	growth rate	5.7220501073e-06	5.38932575820249e-06	297.378146612185	283.15	1.63534627446161e-05
Synechococcus sp. strain UV-005, PCC 6311	Krï¿½ger & Eloff (1978)	growth rate	8.5833027722e-08	8.38321688633885e-08	289.270882229252	283.15	3.59343034375226e-06
Thalassiosira pseudonana strain CCMP1011, STX97	Boyd et al. (2013)	growth rate	4.40307628549e-06	4.40306998318542e-06	299.544600350422	283.15	1.37492695041548e-05
Thalassiosira pseudonana strain CCMP1012, SWAN1	Boyd et al. (2013)	growth rate	3.20318758148e-06	3.20292636446096e-06	298.169420540261	283.15	1.71760522334224e-05
Thalassiosira pseudonana strain CCMP1013, W	Boyd et al. (2013)	growth rate	3.03771826095e-06	3.03771821084893e-06	302.657067717026	283.15	2.23890653534887e-05
Thalassiosira pseudonana strain CCMP1014, FCRG66	Boyd et al. (2013)	growth rate	5.71139304723e-06	5.71139304649093e-06	303.810143239649	283.15	1.9035944451813e-05
Thalassiosira pseudonana strain CCMP1015, ARC5	Boyd et al. (2013)	growth rate	6.128e-06	6.1279997601961e-06	304.114508517185	283.15	1.832442142802e-05
Thalassiosira pseudonana	Thompson et al. (1992)	growth rate	7.44794005497e-06	7.25583053448639e-06	298.463205747722	283.15	2.09368988775775e-05
Thalassiosira rotula strain CCAP1085_21	Boyd et al. (2013)	growth rate	9.10441746981e-06	6.38754028218373e-06	286.733428501875	283.15	8.97839044826093e-06
Thalassiosira rotula strain CCMP3096	Boyd et al. (2013)	growth rate	1.04300538419e-05	6.413836194093e-06	285.456439995627	283.15	8.10412543011873e-06
Thalassiosira rotula strain CCMP3264	Boyd et al. (2013)	growth rate	1.41201613532e-05	6.88167674928278e-06	282.991302008087	283.15	9.27428104547806e-06
Thalassiosira rotula strain JpnTR18	Boyd et al. (2013)	growth rate	1.40935413272e-05	6.51861681972675e-06	282.412377732262	283.15	7.44632596179908e-06
Thalassiosira rotula	Baars (1981)	growth rate	0.0001055631	1.73659845824857e-05	279.745094411376	283.15	1.75082977215298e-05
Trichodesmium erythraeum strain 21_75	Boyd et al. (2013)	growth rate	2.73294123985e-08	2.73129606204242e-08	297.652508575114	283.15	3.10353684518207e-06
Trichodesmium erythraeum strain KO4_20	Boyd et al. (2013)	growth rate	6.6e-08	6.59809590434144e-08	299.074648274271	283.15	3.62462522326093e-06
Trichodesmium radians strain H94	Chappell & Webb (2010)	growth rate	3.28782610726e-10	3.28782399038889e-10	298.661417605787	283.15	4.24985355468613e-06
Akashiwo sanguinea strain BWA	Boyd et al. (2013)	growth rate	2.30445920588e-06	2.29112758259032e-06	300.30827566904	285.65	4.219e-06
Akashiwo sanguinea strain GBB	Boyd et al. (2013)	growth rate	2.64679942155e-06	2.63982202742547e-06	302.229172770425	285.65	4.96365309997369e-06
Akashiwo sanguinea strain RMB	Boyd et al. (2013)	growth rate	1.8362889891e-06	1.83513497445283e-06	300.976806157029	285.65	4.28678859219787e-06
Akashiwo sanguinea strain YRB	Boyd et al. (2013)	growth rate	2.87548049681e-06	2.87548017894404e-06	304.168562792408	285.65	4.71375342099615e-06
Alexandrium minutum	Cannon (1993)	growth rate	2.29847928259e-06	1.43978821338468e-06	286.476433405706	285.65	3.48128133697175e-06
Alexandrium ostenfeldii clone LF-37	Jensen & Moestrup (1997)	growth rate	8.7912181784e-07	8.67403558884367e-07	293.992188537851	285.65	2.54571131473946e-06
Alexandrium ostenfeldii clone LF-37	Jensen and Moestrup (1997)	growth rate	8.94439872902e-07	8.80025817808307e-07	293.958950180537	285.65	2.50084353214508e-06
Alexandrium tamarense clone GTMP	Watras et al. (1982)	growth rate	2.08632839938e-05	3.80059753192746e-06	283.307325500277	285.65	4.048e-06
Amphidinium klebsii	Morton et al. (1992)	growth rate	1.50491512242e-07	1.5048396546403e-07	301.654309290534	285.65	4.38112831571451e-06
Amphiprora sp.	Hulburt (1982)	growth rate	1.4544481883e-06	1.45307866737662e-06	302.007899138896	285.65	1.01726822089231e-05
Apedinella radians	Throndsen (1976)	growth rate	2.57489396683e-05	9.90094005523398e-06	284.64564993811	285.65	1.386e-05
Biceratium furca	Baek et al. (2008)	growth rate	7.17509717376e-07	6.49629582285665e-07	288.693236894696	285.65	5.57268405917369e-06
Ceratium furca	Baek et al. (2008)	growth rate	9.75e-07	8.85860608255514e-07	289.769148889665	285.65	6.04766050008186e-06
Chaetoceros didymus	Hulburt (1982)	growth rate	4.20730171055e-06	3.36438691027999e-06	286.520470384064	285.65	1.5732197689652e-05
Chaetoceros lorenzianus clone Bushehr	Hulburt (1982)	growth rate	4.88408545881e-06	4.88378873119815e-06	302.421280618039	285.65	1.94180575273581e-05
Chaetoceros sp.	Thomas (1966)	growth rate	2.18689601003e-06	2.08951053675597e-06	292.353882008985	285.65	4.08934859640135e-05
Chattonella marina	Kahn (1998)	growth rate	1.96631618609e-06	1.8973824050455e-06	296.692872875611	285.65	4.96509194203629e-06
Chlamydomonas alpina	Seaburg et al. (1981)	growth rate	1.26094321237e-05	1.04956552847113e-05	287.640464366429	285.65	1.0833e-05
Chlamydomonas reinhardtii	McCombie (1960)	growth rate	3.2925578692e-07	2.69779734238222e-07	289.979515766464	285.65	8.20100276050536e-07
Chlamydomonas subcaudata	Seaburg et al. (1981)	growth rate	1.2290386838e-05	1.12311927240638e-05	288.322572726583	285.65	1.12556324712201e-05
Chlorella MFD1	James et al. (1989)	growth rate	1.58624282332e-06	1.48064651661509e-06	299.358236167795	285.65	2.13586270744392e-06
Chlorella sorokiniana strain CCAP 211/8K, 7-11-05	Sorokin (1960)	growth rate	4.71504639263e-07	4.71440765684256e-07	305.611551496707	285.65	8.01894281883181e-05
Chlorella sp. strain MFD-1	James et al. (1989)	growth rate	1.12625922121e-06	1.05925849167425e-06	299.855684050181	285.65	1.50626092065509e-06
Chrysochromulina polylepis strain B3	Edvardsen (1992)	growth rate	8.56474623048e-06	8.1873365831222e-06	291.556259357164	285.65	1.00283288470614e-05
Chrysochromulina polylepis strain B4	Edvardsen (1992)	growth rate	6.67653281667e-06	6.56162546416018e-06	292.641339159123	285.65	8.60334734580083e-06
Chrysochromulina polylepis strain K	Edvardsen (1992)	growth rate	7.72673433272e-06	6.84241352633934e-06	292.357669586682	285.65	9.92215812439549e-06
Cochlodinium polykrikoides strain KG8-ND14	Yamatogi (2005)	growth rate	1.42531444787e-06	1.417628528107e-06	301.624340263579	285.65	6.42953665280192e-06
Conticribra guillardii clone 7-15	Guillard & Ryther (1962)	growth rate	3.66417227631e-05	1.69814036523984e-05	285.181511804768	285.65	1.83323117002693e-05
Conticribra weissflogii strain CCMP1053, SA	Boyd et al. (2013)	growth rate	4.26975242852e-06	4.12078853658396e-06	292.241441353417	285.65	8.41706798154216e-06
Cosmarium beatum SVCK 533	Stamenkovi? et al. (2013)	growth rate	6.94781675339e-07	6.73240124323681e-07	293.244359159943	285.65	4.08553484594946e-06
Cosmarium beatum	Stamenkovi? and Hanelt (2013)	growth rate	6.94781675339e-07	6.73240124323681e-07	293.244359159943	285.65	4.08553484594946e-06
Cosmarium crenatum var. boldtianum strain SVCK 561, ASW Wien #07 141	Stamenkovi? et al. (2013)	growth rate	1.8422184024e-06	1.83531858344162e-06	297.584553681012	285.65	3.5514958266042e-06
Cosmarium crenatum	Stamenkovi? and Hanelt (2013)	growth rate	1.8422184024e-06	1.83531858344162e-06	297.584553681012	285.65	3.5514958266042e-06
Cosmarium meneghinii strain SVCK 59, 1927/Praha Ac. A 231	Stamenkovi? et al. (2013)	growth rate	1.85640475098e-06	1.84748328226141e-06	295.208770826421	285.65	7.83780876930445e-06
Cosmarium meneghinii	Stamenkovi? and Hanelt (2013)	growth rate	1.85640475098e-06	1.84748328226141e-06	295.208770826421	285.65	7.83780876930445e-06
Cosmarium punctulatum #571	Stamenkovi? and Hanelt (2013)	growth rate	1.17312199248e-06	1.16629916836277e-06	295.636404324977	285.65	3.56617885932192e-06
Cosmarium punctulatum var. subpunctulatum strain SVCK 571, ASW Wien #07 136	Stamenkovi? et al. (2013)	growth rate	1.17312199248e-06	1.16629916836277e-06	295.636404324977	285.65	3.56617885932192e-06
Crocosphaera watsonii strain 3A	Boyd et al. (2013)	growth rate	7.11937625547e-07	7.11937621797513e-07	305.64315729012	285.65	4.48518072916037e-06
Crocosphaera watsonii strain WH005	Boyd et al. (2013)	growth rate	5.2739557343e-08	5.26359328316498e-08	297.906171705809	285.65	6.06670206706986e-06
Crocosphaera watsonii strain WH84	Boyd et al. (2013)	growth rate	1.81318466109e-09	1.81291961529952e-09	297.051945043874	285.65	5.90036874380609e-06
Cryptomonas marssonii	Butterwick et al. (2005)	growth rate	3.04585117435e-05	6.39342842261554e-06	281.234849294295	285.65	6.47384632993028e-06
Cryptomonas marssonii	Butterwick et al. (2005)	growth rate	3.31208010442e-05	6.41662645317544e-06	281.036515672339	285.65	6.48187173105464e-06
Cryptomonas sp. strain F	Throndsen (1976)	growth rate	8.12521912889e-06	8.11851391535356e-06	298.864374125329	285.65	1.1287e-05
Cylindrotheca closterium	Maddux & Jones (1964)	growth rate	3.40688621302e-06	2.96946166495997e-06	291.27159259706	285.65	6.86779846685073e-06
Dactyliosolen fragilissimus	Ignatiades & Smayda (1970)	growth rate	4.24374240136e-05	7.95808223996338e-06	282.662722091699	285.65	8.69851693842111e-06
Desmodesmus quadricaudatus strain A 119, Greifswald/15	Komï¿½rek & Ruzicka (1969)	growth rate	2.54334656736e-06	2.22714222430216e-06	292.122054839414	285.65	1.42223715426299e-05
Diacronema lutheri strain NEPCC 5	Thompson (1992)	growth rate	7.44873498384e-06	7.44873498384e-06	298.583484998769	285.65	2.51834243739554e-05
Dinobryon divergens	Butterwick et al. (2005)	growth rate	6.26541442276e-06	4.84900782449039e-06	290.139441948249	285.65	5.43293931720844e-06
Dinobryon divergens	Butterwick et al. (2005)	growth rate	6.29643549115e-06	4.86237909202457e-06	290.077790205304	285.65	5.43643212129116e-06
Ditylum brightwellii	Paasche (1968)	growth rate	9.81819580554e-06	9.80464424339126e-06	301.957182024768	285.65	2.07353003642601e-05
Dunaliella sp.	Van Auken & McNulty (1973)	growth rate	1.44888805909e-06	1.44888802149343e-06	308.085482164017	285.65	8.58417870027731e-06
Emiliania huxleyi strain B92/21	Conte et al. (1998)	growth rate	7.22576949484e-06	7.16755828382453e-06	297.445786319811	285.65	1.09885281199011e-05
Emiliania huxleyi strain G1779Ga	Conte et al. (1998)	growth rate	8.00855014368e-06	7.35512977026469e-06	294.303738446644	285.65	1.31791515056866e-05
Emiliania huxleyi strain S. Africa	Conte et al. (1998)	growth rate	3.70027568012e-06	3.67255450096841e-06	298.373699469851	285.65	1.02504812165466e-05
Emiliania huxleyi strain Van556	Conte et al. (1998)	growth rate	7.72832322267e-06	7.72832322181387e-06	297.517674054122	285.65	9.64748061909341e-06
Eutreptiella gymnastica	Throndsen (1976)	growth rate	1.41038311848e-05	1.38337165152163e-05	294.915413114451	285.65	1.81208156644142e-05
Fibrocapsa japonica strain CAWR-19	de Boer et al. (2005)	growth rate	1.83694599282e-06	1.83559249827272e-06	301.386627176297	285.65	3.84319473139007e-06
Fibrocapsa japonica strain CCRuG-C13	de Boer et al. (2005)	growth rate	2.60955134041e-06	2.20839307810761e-06	291.998422533273	285.65	4.49462114383909e-06
Fibrocapsa japonica strain CS-332	de Boer et al. (2005)	growth rate	1.06050021171e-06	1.04747672298371e-06	295.569683288433	285.65	4.41723358048328e-06
Gephyrocapsa oceanica strain AB1, CAWPOT	Conte et al. (1998)	growth rate	4.96713824916e-06	4.92121258060087e-06	299.217078784773	285.65	1.10067566782855e-05
Gephyrocapsa oceanica var. typica strain A4725	Bollmann et al. (2010)	growth rate	3.58618989033e-06	3.55381924390834e-06	300.026319358119	285.65	1.46018978349166e-05
Gephyrocapsa oceanica var. typica strain A4727	Bollmann et al. (2010)	growth rate	3.43319131473e-06	3.38294419207744e-06	299.121104358311	285.65	1.44849045997685e-05
Gymnodinium isolate 582 (probably G. simplex)	Thomas (1966)	growth rate	3.27250460599e-06	3.2652176869996e-06	299.956458539656	285.65	1.32949473583532e-05
Gymnodinium sp. isolate 581 (probably G. simplex)	Thomas (1966)	growth rate	2.52889290441e-06	2.51864736219814e-06	301.351454147492	285.65	8.91206478427539e-06
Gyrodinium uncatenum strain GYRO	Anderson (1985)	growth rate	1.50590130443e-06	1.36781497781361e-06	294.038254431941	285.65	5.242e-06
Heterocapsa rotundata	Throndsen (1976)	growth rate	1.1564416308e-05	1.15497041426777e-05	296.589708707235	285.65	1.82407093930453e-05
Heteromastix pyriformis	Throndsen (1976)	growth rate	1.1642e-05	1.16390375241884e-05	295.802326975364	285.65	1.8576717592415e-05
Karenia brevis strain APA	McKay et al. (2006)	growth rate	4.52797335322e-07	4.49734925445057e-07	296.187044195774	285.65	2.52244846783375e-06
Leonella granifera strain GeoB*39	Meier et al. (2004)	growth rate	1.0587955556e-07	1.05308599999432e-07	294.665855755078	285.65	4.51426362460465e-06
Leonella granifera	Meier et al. (2004)	growth rate	1.72293080751e-07	1.71696812872696e-07	296.192239277292	285.65	4.77831010694413e-06
Leptocylindrus danicus	Hulburt (1982)	growth rate	1.26378171309e-06	1.26288913801492e-06	299.356089806717	285.65	1.9899e-05
Mastigocladus laminosus strain NZ-86-m	Miyamoto et al. (1979)	growth rate	9.4415010675e-07	9.44150084695972e-07	324.570452932833	285.65	8.20215472430878e-06
Men. 5 (Diatom)	Hulburt (1982)	growth rate	5.1133020771e-06	4.58904258530472e-06	293.629033812641	285.65	1.74702638492825e-05
Microcystis aeruginosa strain NRC-1	Krï¿½ger & Eloff (1978)	growth rate	2.00623888404e-07	1.9210578068178e-07	292.366378162891	285.65	3.06858865385982e-06
Odontella mobiliensis	Hulburt (1982)	growth rate	1.61694953166e-06	1.61184682953725e-06	298.684119297725	285.65	1.61458027103662e-05
Olisthodiscus luteus clone OLMS	Tomas (1978)	growth rate	8.59722123743e-06	6.01888477280146e-06	290.530446794727	285.65	9.729e-06
Olisthodiscus luteus	Throndsen (1976)	growth rate	2.25498579653e-05	9.6546226358714e-06	284.877219925717	285.65	9.81025559755193e-06
Pavlova lutheri	Thompson et al. (1992)	growth rate	7.67372358665e-06	7.67372358665e-06	298.613100696328	285.65	2.47892624893531e-05
Peridinium sp. strain 1	Barker (1935)	growth rate	4.34354876279e-06	4.26388408449327e-06	294.173424218393	285.65	7.07368505858865e-06
Peridinium sp.	Barker (1935)	growth rate	4.3424892446e-06	4.25268978545937e-06	294.026922514122	285.65	7.059e-06
Pernambugia tuberosa strain GeoB*74	Meier et al. (2004)	growth rate	1.12684708903e-06	1.11162160808643e-06	297.44697102803	285.65	3.83841199195607e-06
Phaeodactylum tricornutum clone Pet Pd	Fawley (1984)	growth rate	1.0117e-05	1.01159589679319e-05	299.466313126244	285.65	1.71240918170395e-05
Phaeodactylum tricornutum	Ryther (1954)	growth rate	4.10337948966e-06	3.70050931289751e-06	292.635195176186	285.65	3.94492680242961e-06
Planktothrix agardhii	van Liere (1979)	growth rate	2.74809918518e-06	2.74809908040152e-06	308.565587871547	285.65	8.50361265542034e-06
Pleurochrysis carterae	Blankley & Lewin (1976)	growth rate	1.8904561421e-06	1.8826846874484e-06	296.622462176198	285.65	3.783e-06
Proboscia inermis	Boyd et al. (2013)	growth rate	5.82637068037e-06	7.08164996113239e-13	279.598496525584	285.65	3.776e-06
Prochlorococcus marinus eMED4	Johnson et al. (2006)	growth rate	1.77268077378e-06	1.7702617926431e-06	298.939986585363	285.65	5.47242187181321e-06
Prochlorococcus marinus strain MIT9215 (clade 1)	Johnson (2006)	growth rate	5.89e-07	5.71548729508661e-07	295.930249184585	285.65	5.40190138313901e-06
Prochlorococcus marinus strain MIT9215 (clade 1)	Johnson et al. (2006)	growth rate	6.24396337675e-07	6.05435711911757e-07	296.036235542844	285.65	5.41729593024122e-06
Prochlorococcus marinus strain MIT9312 (clade 1)	Johnson (2006)	growth rate	1.79255469007e-06	1.79255308702656e-06	301.310638577117	285.65	7.21935645524545e-06
Prochlorococcus marinus strain MIT9312 (clade 1)	Johnson et al. (2006)	growth rate	1.80307655902e-06	1.80307505393629e-06	301.303313244107	285.65	7.23474729118777e-06
Prochlorococcus marinus strain MIT9313	Zinser et al. (2007)	growth rate	1.50336915862e-06	1.50336205503839e-06	302.713981460662	285.65	5.35914882573694e-06
Prochlorococcus marinus strain MIT9515 (clade 2)	Johnson (2006)	growth rate	1.782e-06	1.77947570009365e-06	298.932971205499	285.65	5.49866457143942e-06
Prochlorococcus marinus strain NATL2A	Zinser et al. (2007)	growth rate	1.814e-06	1.81104327844269e-06	299.04806858853	285.65	5.53388834876967e-06
Prorocentrum minimum	Grzebyk & Berland (1996)	growth rate	3.75416582218e-06	3.75403589967484e-06	301.40590859002	285.65	8.511611252627e-06
Prorocentrum minimum	Grzebyk and Berland (1996)	growth rate	3.7453131792e-06	3.74517467223206e-06	301.384534545551	285.65	8.50519520538513e-06
Pseudo-nitzschia turgiduloides	Fiala & Oriol (1990)	growth rate	0.0001709088	7.0020745556899e-07	277.276547564606	285.65	5.72956292325632e-06
Pseudopedinella pyriformis	Throndsen (1976)	growth rate	1.37894745341e-05	1.26568927723568e-05	290.577212307755	285.65	1.40423090562345e-05
Pyrodinium bahamense var. compressum	Usup et al. (1994)	growth rate	9.91842343448e-07	9.91840944841046e-07	306.716801483367	285.65	3.08230914736165e-06
Pyrodinium bahamense var. compressum strain PbSA01	Usup et al. (1994)	growth rate	1.05369964061e-06	1.05369835979831e-06	306.774596680798	285.65	3.05794092180539e-06
Rhizosolenia fragilissimus	Ignatiades & Smayda (1970)	growth rate	4.24374240136e-05	7.95808223996338e-06	282.662722091699	285.65	8.69851693842111e-06
Rhizosolenia setigera	Hulburt (1982)	growth rate	7.56154289111e-06	6.48147989335512e-06	288.297857636468	285.65	6.495e-06
Rhizosolenia setigera	Hulburt (1982)	growth rate	3.45260513424e-06	3.03516860380266e-06	289.619093125804	285.65	1.41998957456613e-05
Scrippsiella trochoidea strain ScrpMxB	Binder & Anderson (1987)	growth rate	4.49590986572e-06	4.49590976675891e-06	295.669200638701	285.65	5.59451034831809e-06
Skeletonema marinoionohrnii complex	Kaeriyama et al. (2011)	growth rate	1.57974507785e-05	1.32724414416544e-05	299.175775725661	285.65	1.85680518019672e-05
Skeletonema tropicum clone fall	Hulburt (1982)	growth rate	2.50435951036e-06	2.17654972574849e-06	287.2623848581	285.65	1.6615191681633e-05
Skeletonema tropicum	Kaeriyama et al. (2011)	growth rate	7.832e-06	7.10223892160249e-06	297.378146612185	285.65	1.63534627446061e-05
Synechococcus sp. strain UV-005, PCC 6311	Krï¿½ger & Eloff (1978)	growth rate	4.02333127055e-07	3.6184796824307e-07	289.271127009734	285.65	3.59345941867735e-06
Thalassiosira pseudonana strain CCMP1011, STX97	Boyd et al. (2013)	growth rate	5.58420159384e-06	5.58413284983938e-06	299.544600343378	285.65	1.3749269505897e-05
Thalassiosira pseudonana strain CCMP1012, SWAN1	Boyd et al. (2013)	growth rate	4.716e-06	4.71402659408056e-06	298.169420531209	285.65	1.71760522336501e-05
Thalassiosira pseudonana strain CCMP1013, W	Boyd et al. (2013)	growth rate	4.20247462045e-06	4.20247383048184e-06	302.657067765024	285.65	2.23890654625239e-05
Thalassiosira pseudonana strain CCMP1014, FCRG66	Boyd et al. (2013)	growth rate	6.874e-06	6.87399998333771e-06	303.810143214997	285.65	1.90359445497435e-05
Thalassiosira pseudonana strain CCMP1015, ARC5	Boyd et al. (2013)	growth rate	7.29750654667e-06	7.29750405697876e-06	304.114508762339	285.65	1.83244221076506e-05
Thalassiosira pseudonana	Thompson et al. (1992)	growth rate	9.99690244432e-06	9.52817244445655e-06	298.463124247483	285.65	2.09368994393715e-05
Thalassiosira rotula strain CCAP1085_21	Boyd et al. (2013)	growth rate	1.38364070564e-05	7.79961518641417e-06	286.733428501875	285.65	8.97839049004445e-06
Thalassiosira rotula strain CCMP3096	Boyd et al. (2013)	growth rate	1.50451646786e-05	7.37613136051341e-06	285.456439995627	285.65	8.10412543011197e-06
Thalassiosira rotula strain CCMP3264	Boyd et al. (2013)	growth rate	2.81673239545e-05	8.49666514888768e-06	282.991302135472	285.65	9.27428107252563e-06
Thalassiosira rotula strain JpnTR18	Boyd et al. (2013)	growth rate	2.09247591221e-05	7.1608728221174e-06	282.412377732262	285.65	7.44632596179896e-06
Thalassiosira rotula	Baars (1981)	growth rate	0.0002955036	1.7042444837044e-05	279.745094923857	285.65	1.75082983539765e-05
Trichodesmium erythraeum strain 21_75	Boyd et al. (2013)	growth rate	7.11505868673e-08	7.09886071686838e-08	297.652507699208	285.65	3.10353675632998e-06
Trichodesmium erythraeum strain KO4_20	Boyd et al. (2013)	growth rate	1.42544102091e-07	1.42387225977128e-07	299.07464943262	285.65	3.62462532785165e-06
Trichodesmium radians strain H94	Chappell & Webb (2010)	growth rate	1.79488696985e-09	1.79487420193612e-09	298.661417605796	285.65	4.24985355205954e-06
Akashiwo sanguinea strain BWA	Boyd et al. (2013)	growth rate	2.81781928761e-06	2.7774750749562e-06	300.30827566904	288.15	4.219e-06
Akashiwo sanguinea strain GBB	Boyd et al. (2013)	growth rate	3.15516811829e-06	3.13398791054635e-06	302.22917733997	288.15	4.96365274403735e-06
Akashiwo sanguinea strain RMB	Boyd et al. (2013)	growth rate	2.29827706303e-06	2.29321376365826e-06	300.976802503498	288.15	4.28678862476486e-06
Akashiwo sanguinea strain YRB	Boyd et al. (2013)	growth rate	3.16242556202e-06	3.16242213529653e-06	304.168563545478	288.15	4.71375314753203e-06
Alexandrium minutum	Cannon (1993)	growth rate	1.05686034687e-05	2.76499103074618e-06	286.476432805336	288.15	3.48128005480265e-06
Alexandrium ostenfeldii clone LF-37	Jensen & Moestrup (1997)	growth rate	1.49554778542e-06	1.42382315423201e-06	293.992188401018	288.15	2.54571131519629e-06
Alexandrium ostenfeldii clone LF-37	Jensen and Moestrup (1997)	growth rate	1.51036870981e-06	1.42775346244108e-06	293.958950205851	288.15	2.50084353393257e-06
Alexandrium tamarense clone GTMP	Watras et al. (1982)	growth rate	9.16187950928e-05	4.03577537610556e-06	283.307326130935	288.15	4.048e-06
Amphidinium klebsii	Morton et al. (1992)	growth rate	2.91722286067e-07	2.91648451271673e-07	301.65430686501	288.15	4.38112825292579e-06
Amphiprora sp.	Hulburt (1982)	growth rate	2.208e-06	2.20166575879882e-06	302.007899961193	288.15	1.01726825703475e-05
Apedinella radians	Throndsen (1976)	growth rate	7.81703056111e-05	1.28376105823325e-05	284.64564993811	288.15	1.386e-05
Biceratium furca	Baek et al. (2008)	growth rate	4.34567138872e-06	2.60137543447495e-06	288.693240716554	288.15	5.57268800403828e-06
Ceratium furca	Baek et al. (2008)	growth rate	3.53064461096e-06	2.50634601056956e-06	289.769149245053	288.15	6.04766065999818e-06
Chaetoceros didymus	Hulburt (1982)	growth rate	0.0002112596	1.50383226461091e-05	286.520468784303	288.15	1.57321943056593e-05
Chaetoceros lorenzianus clone Bushehr	Hulburt (1982)	growth rate	6.54418401007e-06	6.54236858065563e-06	302.421280791798	288.15	1.94180573358141e-05
Chaetoceros sp.	Thomas (1966)	growth rate	6.841e-06	5.95553043346663e-06	292.35388622437	288.15	4.08934925825568e-05
Chattonella marina	Kahn (1998)	growth rate	2.86792579366e-06	2.65872950622063e-06	296.692872875611	288.15	4.96509194203634e-06
Chlamydomonas alpina	Seaburg et al. (1981)	growth rate	2.1600373001e-05	8.63396400485423e-06	287.640464417121	288.15	1.0833e-05
Chlamydomonas reinhardtii	McCombie (1960)	growth rate	7.0414142368e-07	4.59986252316654e-07	289.979513842366	288.15	8.20100092627263e-07
Chlamydomonas subcaudata	Seaburg et al. (1981)	growth rate	1.55096777775e-05	8.33977131813552e-06	288.322572737842	288.15	1.1255632484184e-05
Chlorella MFD1	James et al. (1989)	growth rate	1.89942512339e-06	1.6995280294138e-06	299.358226781123	288.15	2.13586277049029e-06
Chlorella sorokiniana strain CCAP 211/8K, 7-11-05	Sorokin (1960)	growth rate	1.01660486204e-06	1.01615543907871e-06	305.611554017081	288.15	8.01894293568849e-05
Chlorella sp. strain MFD-1	James et al. (1989)	growth rate	1.33527580007e-06	1.20853922649551e-06	299.855695985473	288.15	1.50626086592129e-06
Chrysochromulina polylepis strain B3	Edvardsen (1992)	growth rate	1.150935298e-05	9.81870772997315e-06	291.556259357164	288.15	1.00283288233479e-05
Chrysochromulina polylepis strain B4	Edvardsen (1992)	growth rate	8.6814163423e-06	8.06761250861202e-06	292.641338499921	288.15	8.60334677589449e-06
Chrysochromulina polylepis strain K	Edvardsen (1992)	growth rate	1.10245004222e-05	8.61173474425e-06	292.357669586682	288.15	9.92215812420147e-06
Cochlodinium polykrikoides strain KG8-ND14	Yamatogi (2005)	growth rate	2.0392536591e-06	2.01359126347542e-06	301.624340275483	288.15	6.42953665730617e-06
Conticribra guillardii clone 7-15	Guillard & Ryther (1962)	growth rate	6.4315e-05	1.83255894939129e-05	285.181511488979	288.15	1.83323116398825e-05
Conticribra weissflogii strain CCMP1053, SA	Boyd et al. (2013)	growth rate	7.19022191644e-06	6.36503943540555e-06	292.241441995725	288.15	8.41706906772823e-06
Cosmarium beatum SVCK 533	Stamenkovi? et al. (2013)	growth rate	1.54613868326e-06	1.40383114423621e-06	293.244361798768	288.15	4.08553599925373e-06
Cosmarium beatum	Stamenkovi? and Hanelt (2013)	growth rate	1.54613868326e-06	1.40383114423621e-06	293.244361798768	288.15	4.08553599925373e-06
Cosmarium crenatum var. boldtianum strain SVCK 561, ASW Wien #07 141	Stamenkovi? et al. (2013)	growth rate	2.37266048944e-06	2.34318128903955e-06	297.584553844319	288.15	3.55149576240926e-06
Cosmarium crenatum	Stamenkovi? and Hanelt (2013)	growth rate	2.37266048944e-06	2.34318128903955e-06	297.584553844319	288.15	3.55149576240926e-06
Cosmarium meneghinii strain SVCK 59, 1927/Praha Ac. A 231	Stamenkovi? et al. (2013)	growth rate	3.2688964145e-06	3.20430233234171e-06	295.20877095134	288.15	7.83780875075753e-06
Cosmarium meneghinii	Stamenkovi? and Hanelt (2013)	growth rate	3.2688964145e-06	3.20430233234171e-06	295.20877095134	288.15	7.83780875075753e-06
Cosmarium punctulatum #571	Stamenkovi? and Hanelt (2013)	growth rate	1.84054859853e-06	1.80108626747985e-06	295.636404291107	288.15	3.56617886818079e-06
Cosmarium punctulatum var. subpunctulatum strain SVCK 571, ASW Wien #07 136	Stamenkovi? et al. (2013)	growth rate	1.84054859853e-06	1.80108626747985e-06	295.636404291107	288.15	3.56617886818079e-06
Crocosphaera watsonii strain 3A	Boyd et al. (2013)	growth rate	9.52911573683e-07	9.5291151079201e-07	305.643157836505	288.15	4.48518098092054e-06
Crocosphaera watsonii strain WH005	Boyd et al. (2013)	growth rate	1.5773428729e-07	1.56587312092996e-07	297.906171705832	288.15	6.06670206925337e-06
Crocosphaera watsonii strain WH84	Boyd et al. (2013)	growth rate	1.18666616776e-08	1.18539072948557e-08	297.051945043874	288.15	5.90036874752722e-06
Cryptomonas marssonii	Butterwick et al. (2005)	growth rate	5.68482762366e-05	6.43778003013894e-06	281.234848590351	288.15	6.47384627929589e-06
Cryptomonas marssonii	Butterwick et al. (2005)	growth rate	6.3338e-05	6.43528207139051e-06	281.036515921537	288.15	6.48187174850043e-06
Cryptomonas sp. strain F	Throndsen (1976)	growth rate	9.18983265078e-06	9.15936995263322e-06	298.864374125329	288.15	1.1287e-05
Cylindrotheca closterium	Maddux & Jones (1964)	growth rate	6.16831866596e-06	4.57439375183957e-06	291.27159259706	288.15	6.86779846476826e-06
Dactyliosolen fragilissimus	Ignatiades & Smayda (1970)	growth rate	0.0001338378	8.66973033269238e-06	282.662722136162	288.15	8.69851695468229e-06
Desmodesmus quadricaudatus strain A 119, Greifswald/15	Komï¿½rek & Ruzicka (1969)	growth rate	5.31e-06	4.06916043470674e-06	292.122058528033	288.15	1.42223725222626e-05
Diacronema lutheri strain NEPCC 5	Thompson (1992)	growth rate	9.73665980901e-06	9.73665980901e-06	298.586312288254	288.15	2.51751999595205e-05
Dinobryon divergens	Butterwick et al. (2005)	growth rate	8.49914091799e-06	5.37108182333913e-06	290.139441830567	288.15	5.43293931536995e-06
Dinobryon divergens	Butterwick et al. (2005)	growth rate	8.556e-06	5.3798704381459e-06	290.077790251535	288.15	5.43643212833267e-06
Ditylum brightwellii	Paasche (1968)	growth rate	1.19612024111e-05	1.19137799575892e-05	301.957182053065	288.15	2.07353003697355e-05
Dunaliella sp.	Van Auken & McNulty (1973)	growth rate	1.87242948659e-06	1.8724290972757e-06	308.085482241069	288.15	8.58417872351579e-06
Emiliania huxleyi strain B92/21	Conte et al. (1998)	growth rate	8.80107611563e-06	8.60085862043404e-06	297.445785979709	288.15	1.09885278830329e-05
Emiliania huxleyi strain G1779Ga	Conte et al. (1998)	growth rate	1.13813013899e-05	9.63308484603651e-06	294.303738946918	288.15	1.31791515416552e-05
Emiliania huxleyi strain S. Africa	Conte et al. (1998)	growth rate	5.1866452584e-06	5.08295844966848e-06	298.373699513287	288.15	1.02504812205234e-05
Emiliania huxleyi strain Van556	Conte et al. (1998)	growth rate	8.23074775251e-06	8.23074761907487e-06	297.517674051135	288.15	9.64748063526228e-06
Eutreptiella gymnastica	Throndsen (1976)	growth rate	1.72554396129e-05	1.63110539318347e-05	294.915413051681	288.15	1.81208156401132e-05
Fibrocapsa japonica strain CAWR-19	de Boer et al. (2005)	growth rate	2.23667963997e-06	2.23122584650387e-06	301.386627154146	288.15	3.84319473542097e-06
Fibrocapsa japonica strain CCRuG-C13	de Boer et al. (2005)	growth rate	4.15778147604e-06	3.05990401372945e-06	291.99842046139	288.15	4.4946211116298e-06
Fibrocapsa japonica strain CS-332	de Boer et al. (2005)	growth rate	1.83422208864e-06	1.76596597155242e-06	295.569683310063	288.15	4.4172335856273e-06
Gephyrocapsa oceanica strain AB1, CAWPOT	Conte et al. (1998)	growth rate	6.50231288149e-06	6.35720694394566e-06	299.217083134734	288.15	1.1006757591927e-05
Gephyrocapsa oceanica var. typica strain A4725	Bollmann et al. (2010)	growth rate	5.23687588301e-06	5.12752242000423e-06	300.026322813532	288.15	1.46018983537509e-05
Gephyrocapsa oceanica var. typica strain A4727	Bollmann et al. (2010)	growth rate	5.17762639656e-06	5.01018332746957e-06	299.121101258783	288.15	1.44849040247382e-05
Gymnodinium isolate 582 (probably G. simplex)	Thomas (1966)	growth rate	4.74181723314e-06	4.70990594721376e-06	299.956458539656	288.15	1.32949473583582e-05
Gymnodinium sp. isolate 581 (probably G. simplex)	Thomas (1966)	growth rate	3.47265507557e-06	3.43768384565892e-06	301.351454732977	288.15	8.91206538188645e-06
Gyrodinium uncatenum strain GYRO	Anderson (1985)	growth rate	2.58707024328e-06	2.15093424997162e-06	294.038259715385	288.15	5.242e-06
Heterocapsa rotundata	Throndsen (1976)	growth rate	1.40648735033e-05	1.39794594877319e-05	296.589708748746	288.15	1.82407093382079e-05
Heteromastix pyriformis	Throndsen (1976)	growth rate	1.41772389541e-05	1.41480631370875e-05	295.802326975364	288.15	1.8576717592415e-05
Karenia brevis strain APA	McKay et al. (2006)	growth rate	8.15e-07	7.96683400473143e-07	296.18704577194	288.15	2.5224488516786e-06
Leonella granifera strain GeoB*39	Meier et al. (2004)	growth rate	3.52e-07	3.43815889003951e-07	294.665852726487	288.15	4.51426201143194e-06
Leonella granifera	Meier et al. (2004)	growth rate	4.49881173232e-07	4.43753367638822e-07	296.192237177203	288.15	4.77830887561168e-06
Leptocylindrus danicus	Hulburt (1982)	growth rate	2.4292380206e-06	2.42246814264343e-06	299.356089806909	288.15	1.9899e-05
Mastigocladus laminosus strain NZ-86-m	Miyamoto et al. (1979)	growth rate	1.13782708561e-06	1.1378269908372e-06	324.570453243096	288.15	8.20215486871341e-06
Men. 5 (Diatom)	Hulburt (1982)	growth rate	8.888e-06	7.23559796845361e-06	293.629030276764	288.15	1.74702650658855e-05
Microcystis aeruginosa strain NRC-1	Krï¿½ger & Eloff (1978)	growth rate	6.09533940751e-07	5.32886037691658e-07	292.366379999075	288.15	3.06858887949056e-06
Odontella mobiliensis	Hulburt (1982)	growth rate	2.932e-06	2.90314040002962e-06	298.684119363611	288.15	1.6145802757791e-05
Olisthodiscus luteus clone OLMS	Tomas (1978)	growth rate	1.20702259806e-05	7.25495858024407e-06	290.530364014355	288.15	9.729e-06
Olisthodiscus luteus	Throndsen (1976)	growth rate	4.15149169075e-05	9.4987195104913e-06	284.877219925717	288.15	9.81025559761949e-06
Pavlova lutheri	Thompson et al. (1992)	growth rate	9.92487210858e-06	9.92487210858e-06	298.628039602387	288.15	2.4753e-05
Peridinium sp. strain 1	Barker (1935)	growth rate	5.98351668098e-06	5.63671492051215e-06	294.173424674747	288.15	7.0736851399983e-06
Peridinium sp.	Barker (1935)	growth rate	6.0305677155e-06	5.64469016100918e-06	294.026922389887	288.15	7.059e-06
Pernambugia tuberosa strain GeoB*74	Meier et al. (2004)	growth rate	1.71237797955e-06	1.65444911743669e-06	297.446969893119	288.15	3.83841195719348e-06
Phaeodactylum tricornutum clone Pet Pd	Fawley (1984)	growth rate	1.18252230762e-05	1.18183858728044e-05	299.466313002965	288.15	1.71240920097214e-05
Phaeodactylum tricornutum	Ryther (1954)	growth rate	4.89808742579e-06	3.93813176450722e-06	292.635195144388	288.15	3.94492680205559e-06
Planktothrix agardhii	van Liere (1979)	growth rate	3.24218475091e-06	3.24218384146141e-06	308.565587871547	288.15	8.50361265835919e-06
Pleurochrysis carterae	Blankley & Lewin (1976)	growth rate	2.51932570034e-06	2.48219154060911e-06	296.622462191565	288.15	3.783e-06
Proboscia inermis	Boyd et al. (2013)	growth rate	6.65660514926e-06	1.36752840499625e-15	279.59849643349	288.15	3.776e-06
Prochlorococcus marinus eMED4	Johnson et al. (2006)	growth rate	2.46890199079e-06	2.45674127903994e-06	298.93998636729	288.15	5.47242187251541e-06
Prochlorococcus marinus strain MIT9215 (clade 1)	Johnson (2006)	growth rate	1.16680398146e-06	1.08744254967259e-06	295.930247205494	288.15	5.40190127929673e-06
Prochlorococcus marinus strain MIT9215 (clade 1)	Johnson et al. (2006)	growth rate	1.21476168577e-06	1.13132616534407e-06	296.036237568075	288.15	5.41729600953274e-06
Prochlorococcus marinus strain MIT9312 (clade 1)	Johnson (2006)	growth rate	2.41057554466e-06	2.41055350262371e-06	301.310638628555	288.15	7.21935649723835e-06
Prochlorococcus marinus strain MIT9312 (clade 1)	Johnson et al. (2006)	growth rate	2.4227278531e-06	2.42270691414225e-06	301.303313326378	288.15	7.23474730239057e-06
Prochlorococcus marinus strain MIT9313	Zinser et al. (2007)	growth rate	1.94366406113e-06	1.94360343004486e-06	302.713981410639	288.15	5.35914881058635e-06
Prochlorococcus marinus strain MIT9515 (clade 2)	Johnson (2006)	growth rate	2.4829091213e-06	2.4702992295857e-06	298.932971243077	288.15	5.49866458328855e-06
Prochlorococcus marinus strain NATL2A	Zinser et al. (2007)	growth rate	2.51743846721e-06	2.5032766476259e-06	299.048068866949	288.15	5.5338883726399e-06
Prorocentrum minimum	Grzebyk & Berland (1996)	growth rate	4.56176379817e-06	4.56089564273264e-06	301.405908659641	288.15	8.51161125624227e-06
Prorocentrum minimum	Grzebyk and Berland (1996)	growth rate	4.55510409867e-06	4.55418590015899e-06	301.384534549377	288.15	8.50519519421466e-06
Pseudo-nitzschia turgiduloides	Fiala & Oriol (1990)	growth rate	0.0003714971	3.15074574697036e-07	277.276546195308	288.15	5.72956166706417e-06
Pseudopedinella pyriformis	Throndsen (1976)	growth rate	1.83622074783e-05	1.40418580512849e-05	290.577211640071	288.15	1.4042308011566e-05
Pyrodinium bahamense var. compressum	Usup et al. (1994)	growth rate	1.19574677401e-06	1.19573752839498e-06	306.716800956733	288.15	3.08230903742894e-06
Pyrodinium bahamense var. compressum strain PbSA01	Usup et al. (1994)	growth rate	1.2563245883e-06	1.25631609344819e-06	306.774596653396	288.15	3.05794092764786e-06
Rhizosolenia fragilissimus	Ignatiades & Smayda (1970)	growth rate	0.0001338378	8.669727295949e-06	282.662721913994	288.15	8.69851686520734e-06
Rhizosolenia setigera	Hulburt (1982)	growth rate	9.27680155113e-06	4.86826331610819e-06	288.297857693952	288.15	6.495e-06
Rhizosolenia setigera	Hulburt (1982)	growth rate	1.05420734918e-05	7.109065144316e-06	289.619095984474	288.15	1.41999005453151e-05
Scrippsiella trochoidea strain ScrpMxB	Binder & Anderson (1987)	growth rate	4.86259668612e-06	4.86258691271965e-06	295.669200213747	288.15	5.59451053399032e-06
Skeletonema marinoionohrnii complex	Kaeriyama et al. (2011)	growth rate	1.86117540784e-05	1.47526545593946e-05	299.175771785522	288.15	1.85680517296171e-05
Skeletonema tropicum clone fall	Hulburt (1982)	growth rate	4.67325434407e-05	1.22625075645563e-05	287.262150874366	288.15	1.6615e-05
Skeletonema tropicum	Kaeriyama et al. (2011)	growth rate	1.06618628378e-05	9.11656247202221e-06	297.378146648881	288.15	1.63534627078105e-05
Synechococcus sp. strain UV-005, PCC 6311	Krï¿½ger & Eloff (1978)	growth rate	1.83584213235e-06	1.2153302342163e-06	289.271081638112	288.15	3.59345513296595e-06
Thalassiosira pseudonana strain CCMP1011, STX97	Boyd et al. (2013)	growth rate	7.053e-06	7.05228067067216e-06	299.544600347605	288.15	1.37492695112303e-05
Thalassiosira pseudonana strain CCMP1012, SWAN1	Boyd et al. (2013)	growth rate	6.897e-06	6.88262453311026e-06	298.169420537459	288.15	1.71760522445357e-05
Thalassiosira pseudonana strain CCMP1013, W	Boyd et al. (2013)	growth rate	5.78118413664e-06	5.78117226289174e-06	302.657067782641	288.15	2.238906560637e-05
Thalassiosira pseudonana strain CCMP1014, FCRG66	Boyd et al. (2013)	growth rate	8.24663811879e-06	8.24663776291165e-06	303.810143251736	288.15	1.90359445140443e-05
Thalassiosira pseudonana strain CCMP1015, ARC5	Boyd et al. (2013)	growth rate	8.66387482888e-06	8.66385000927554e-06	304.114508639896	288.15	1.83244214480881e-05
Thalassiosira pseudonana	Thompson et al. (1992)	growth rate	1.33497962743e-05	1.22428213303474e-05	298.463191403016	288.15	2.09368990727827e-05
Thalassiosira rotula strain CCAP1085_21	Boyd et al. (2013)	growth rate	2.0875668328e-05	8.7205160658541e-06	286.733428501875	288.15	8.97839048993252e-06
Thalassiosira rotula strain CCMP3096	Boyd et al. (2013)	growth rate	2.15648502068e-05	7.95395636128069e-06	285.456439995627	288.15	8.10412542986601e-06
Thalassiosira rotula strain CCMP3264	Boyd et al. (2013)	growth rate	5.55197571064e-05	9.21301684664949e-06	282.991301994716	288.15	9.27428104307435e-06
Thalassiosira rotula strain JpnTR18	Boyd et al. (2013)	growth rate	3.08547822257e-05	7.43197134808898e-06	282.412378356017	288.15	7.4463267064555e-06
Thalassiosira rotula	Baars (1981)	growth rate	0.0008125602	1.54739516086053e-05	279.745097228153	288.15	1.75083007436329e-05
Trichodesmium erythraeum strain 21_75	Boyd et al. (2013)	growth rate	1.82186561831e-07	1.80660662376484e-07	297.652510027549	288.15	3.10353700715317e-06
Trichodesmium erythraeum strain KO4_20	Boyd et al. (2013)	growth rate	3.04e-07	3.02755777966988e-07	299.074651799322	288.15	3.62462610747689e-06
Trichodesmium radians strain H94	Chappell & Webb (2010)	growth rate	9.51425235448e-09	9.51353518016446e-09	298.661417034763	288.15	4.24985206060138e-06
Akashiwo sanguinea strain BWA	Boyd et al. (2013)	growth rate	3.43363941241e-06	3.31530337312517e-06	300.30827566904	290.65	4.219e-06
Akashiwo sanguinea strain GBB	Boyd et al. (2013)	growth rate	3.74982760458e-06	3.68713385696462e-06	302.229177306761	290.65	4.96365275009943e-06
Akashiwo sanguinea strain RMB	Boyd et al. (2013)	growth rate	2.86541284282e-06	2.843837644576e-06	300.976802511888	290.65	4.28678862521766e-06
Akashiwo sanguinea strain YRB	Boyd et al. (2013)	growth rate	3.47231823672e-06	3.4722827759794e-06	304.168563811963	290.65	4.7137530482616e-06
Alexandrium minutum	Cannon (1993)	growth rate	4.73365300702e-05	3.38039334916051e-06	286.476433407265	290.65	3.48128133681157e-06
Alexandrium ostenfeldii clone LF-37	Jensen & Moestrup (1997)	growth rate	2.52105283091e-06	2.12992839992451e-06	293.992188537853	290.65	2.54571131667185e-06
Alexandrium ostenfeldii clone LF-37	Jensen and Moestrup (1997)	growth rate	2.52755502238e-06	2.10624405710575e-06	293.958950215002	290.65	2.50084353343674e-06
Alexandrium tamarense clone GTMP	Watras et al. (1982)	growth rate	0.0003922219	3.80434959089487e-06	283.307326605643	290.65	4.048e-06
Amphidinium klebsii	Morton et al. (1992)	growth rate	5.5909090307e-07	5.58396874186127e-07	301.654306857012	290.65	4.38112824051871e-06
Amphiprora sp.	Hulburt (1982)	growth rate	3.328e-06	3.2995732221558e-06	302.007900105388	290.65	1.01726825389764e-05
Apedinella radians	Throndsen (1976)	growth rate	0.0002328239	1.38077590635196e-05	284.64564993811	290.65	1.386e-05
Biceratium furca	Baek et al. (2008)	growth rate	2.5517e-05	4.9380335401949e-06	288.693240535995	290.65	5.57268790330981e-06
Ceratium furca	Baek et al. (2008)	growth rate	1.25048533836e-05	4.77229823056865e-06	289.769150781805	290.65	6.0476611158935e-06
Chaetoceros didymus	Hulburt (1982)	growth rate	0.009916823	1.55956389492284e-05	286.520468199953	290.65	1.57321930891657e-05
Chaetoceros gracilis	Thompson et al. (1992)	growth rate	1.48896005571e-05	1.48896005571e-05	298.152203726069	290.65	3.01548393862508e-05
Chaetoceros lorenzianus clone Bushehr	Hulburt (1982)	growth rate	8.72452408406e-06	8.71376572895497e-06	302.421280778944	290.65	1.94180575693516e-05
Chaetoceros sp.	Thomas (1966)	growth rate	2.0984e-05	1.43242023751548e-05	292.353881347832	290.65	4.0893484942404e-05
Chattonella marina	Kahn (1998)	growth rate	4.15587688029e-06	3.55764246589853e-06	296.692872875611	290.65	4.96509194203633e-06
Chlamydomonas alpina	Seaburg et al. (1981)	growth rate	3.66611055637e-05	3.10206471406876e-06	287.640465049365	290.65	1.0833e-05
Chlamydomonas reinhardtii	McCombie (1960)	growth rate	1.48630277423e-06	6.58015543953105e-07	289.979513057374	290.65	8.20100077771761e-07
Chlamydomonas subcaudata	Seaburg et al. (1981)	growth rate	1.9494e-05	2.28134178950812e-06	288.322572760278	290.65	1.12556324998789e-05
Chlorella MFD1	James et al. (1989)	growth rate	2.26740132228e-06	1.90167521960687e-06	299.358234601163	290.65	2.13586271599728e-06
Chlorella sorokiniana strain CCAP 211/8K, 7-11-05	Sorokin (1960)	growth rate	2.16310670997e-06	2.16005093350937e-06	305.61155371955	290.65	8.01894297737576e-05
Chlorella sp. strain MFD-1	James et al. (1989)	growth rate	1.57845351614e-06	1.34639313580884e-06	299.855693192774	290.65	1.50626087785907e-06
Chrysochromulina polylepis strain B3	Edvardsen (1992)	growth rate	1.53879077286e-05	9.44765873234594e-06	291.556258698665	290.65	1.00283280925966e-05
Chrysochromulina polylepis strain B4	Edvardsen (1992)	growth rate	1.12374656778e-05	8.49843430910403e-06	292.641338499921	290.65	8.60334677589449e-06
Chrysochromulina polylepis strain K	Edvardsen (1992)	growth rate	1.56338657245e-05	9.77524343708205e-06	292.357669586682	290.65	9.92215810058307e-06
Cochlodinium polykrikoides strain KG8-ND14	Yamatogi (2005)	growth rate	2.89971777658e-06	2.81656949981947e-06	301.624340342372	290.65	6.42953666841108e-06
Conticribra guillardii clone 7-15	Guillard & Ryther (1962)	growth rate	0.000111801	1.75570200522522e-05	285.181512073906	290.65	1.83323117565072e-05
Conticribra weissflogii strain CCMP1053, SA	Boyd et al. (2013)	growth rate	1.20001925576e-05	8.24847935493493e-06	292.241441995957	290.65	8.41706906388948e-06
Cosmarium beatum SVCK 533	Stamenkovi? et al. (2013)	growth rate	3.39369219906e-06	2.58104761580497e-06	293.244360374379	290.65	4.08553508455509e-06
Cosmarium beatum	Stamenkovi? and Hanelt (2013)	growth rate	3.39369219906e-06	2.58104761580497e-06	293.244360374379	290.65	4.08553508455509e-06
Cosmarium crenatum var. boldtianum strain SVCK 561, ASW Wien #07 141	Stamenkovi? et al. (2013)	growth rate	3.04256321037e-06	2.92207074779607e-06	297.584553645453	290.65	3.55149585794564e-06
Cosmarium crenatum	Stamenkovi? and Hanelt (2013)	growth rate	3.04256321037e-06	2.92207074779607e-06	297.584553645453	290.65	3.55149585794564e-06
Cosmarium meneghinii strain SVCK 59, 1927/Praha Ac. A 231	Stamenkovi? et al. (2013)	growth rate	5.70036114633e-06	5.26782923688486e-06	295.208771390033	290.65	7.83780813651398e-06
Cosmarium meneghinii	Stamenkovi? and Hanelt (2013)	growth rate	5.70036114633e-06	5.26782923688486e-06	295.208771390033	290.65	7.83780813651398e-06
Cosmarium punctulatum #571	Stamenkovi? and Hanelt (2013)	growth rate	2.86540769013e-06	2.65261774070728e-06	295.636404607143	290.65	3.56617869466836e-06
Cosmarium punctulatum var. subpunctulatum strain SVCK 571, ASW Wien #07 136	Stamenkovi? et al. (2013)	growth rate	2.86540769013e-06	2.65261774070728e-06	295.636404607143	290.65	3.56617869466836e-06
Crocosphaera watsonii strain 3A	Boyd et al. (2013)	growth rate	1.26906888793e-06	1.26906788299486e-06	305.643157836533	290.65	4.48518098088813e-06
Crocosphaera watsonii strain WH005	Boyd et al. (2013)	growth rate	4.62946506607e-07	4.50931902157523e-07	297.906171705832	290.65	6.06670206925995e-06
Crocosphaera watsonii strain WH84	Boyd et al. (2013)	growth rate	7.51933675109e-08	7.46224013964212e-08	297.051945043874	290.65	5.90036875299783e-06
Cryptomonas marssonii	Butterwick et al. (2005)	growth rate	0.0001049696	6.14366933413184e-06	281.234849356633	290.65	6.47384633512897e-06
Cryptomonas marssonii	Butterwick et al. (2005)	growth rate	0.0001197797	6.12839286939746e-06	281.03651726091	290.65	6.48187188839368e-06
Cryptomonas sp. strain F	Throndsen (1976)	growth rate	1.03719459563e-05	1.02380767446837e-05	298.864374125329	290.65	1.1287e-05
Cylindrotheca closterium	Maddux & Jones (1964)	growth rate	1.10545464891e-05	6.10039704546441e-06	291.271591982659	290.65	6.86779749482134e-06
Dactyliosolen fragilissimus	Ignatiades & Smayda (1970)	growth rate	0.000413835	8.59952901465319e-06	282.662722202765	290.65	8.69851698106894e-06
Desmodesmus quadricaudatus strain A 119, Greifswald/15	Komï¿½rek & Ruzicka (1969)	growth rate	1.09469064845e-05	6.64905700415081e-06	292.122056900035	290.65	1.42223721235973e-05
Diacronema lutheri strain NEPCC 5	Thompson (1992)	growth rate	1.26688241036e-05	1.26688241035996e-05	298.58869628812	290.65	2.5168285597146e-05
Dinobryon divergens	Butterwick et al. (2005)	growth rate	1.14689112039e-05	5.34069679601319e-06	290.139441409514	290.65	5.43293931495954e-06
Dinobryon divergens	Butterwick et al. (2005)	growth rate	1.15653564943e-05	5.33518641054591e-06	290.077790140407	290.65	5.43643212501167e-06
Ditylum brightwellii	Paasche (1968)	growth rate	1.45225528572e-05	1.43608973945333e-05	301.957182062434	290.65	2.07353003740254e-05
Dunaliella sp.	Van Auken & McNulty (1973)	growth rate	2.40912992484e-06	2.40912605236397e-06	308.085482181379	290.65	8.58417871968997e-06
Emiliania huxleyi strain B92/21	Conte et al. (1998)	growth rate	1.06835103031e-05	1.00265082930398e-05	297.445786238463	290.65	1.09885280407029e-05
Emiliania huxleyi strain G1779Ga	Conte et al. (1998)	growth rate	1.6077e-05	1.17676614981254e-05	294.303740466123	290.65	1.31791527313734e-05
Emiliania huxleyi strain S. Africa	Conte et al. (1998)	growth rate	7.228e-06	6.85642974665899e-06	298.373699519555	290.65	1.0250481231414e-05
Emiliania huxleyi strain Van556	Conte et al. (1998)	growth rate	8.75634249002e-06	8.75632342315419e-06	297.517674675452	290.65	9.6474807624081e-06
Eutreptiella gymnastica	Throndsen (1976)	growth rate	2.10381804853e-05	1.80044049300784e-05	294.915413067704	290.65	1.81208156533052e-05
Fibrocapsa japonica strain CAWR-19	de Boer et al. (2005)	growth rate	2.71418979575e-06	2.69281592803018e-06	301.386627114327	290.65	3.84319473395766e-06
Fibrocapsa japonica strain CCRuG-C13	de Boer et al. (2005)	growth rate	6.57169170501e-06	3.86471576363185e-06	291.998424656708	290.65	4.49462120077122e-06
Fibrocapsa japonica strain CS-332	de Boer et al. (2005)	growth rate	3.14267747471e-06	2.81140508745896e-06	295.569683476865	290.65	4.41723357644157e-06
Gephyrocapsa oceanica strain AB1, CAWPOT	Conte et al. (1998)	growth rate	8.47261640431e-06	8.03109590599946e-06	299.217078768997	290.65	1.10067571776782e-05
Gephyrocapsa oceanica var. typica strain A4725	Bollmann et al. (2010)	growth rate	7.59770607572e-06	7.24136874543827e-06	300.026315295208	290.65	1.46018974344712e-05
Gephyrocapsa oceanica var. typica strain A4727	Bollmann et al. (2010)	growth rate	7.75343063909e-06	7.21815509315743e-06	299.121101447714	290.65	1.44849040818984e-05
Gymnodinium isolate 582 (probably G. simplex)	Thomas (1966)	growth rate	6.82713656597e-06	6.69208580966618e-06	299.956457945179	290.65	1.32949462858115e-05
Gymnodinium sp. isolate 581 (probably G. simplex)	Thomas (1966)	growth rate	4.74267641165e-06	4.62681038942026e-06	301.351454734991	290.65	8.91206536979093e-06
Gyrodinium uncatenum strain GYRO	Anderson (1985)	growth rate	4.40328844478e-06	3.13982615574633e-06	294.038258685646	290.65	5.242e-06
Heterocapsa rotundata	Throndsen (1976)	growth rate	1.70484734885e-05	1.65756189043867e-05	296.589708715564	290.65	1.82407093921055e-05
Heteromastix pyriformis	Throndsen (1976)	growth rate	1.72061140316e-05	1.69332017188657e-05	295.802326975364	290.65	1.85767175924148e-05
Karenia brevis strain APA	McKay et al. (2006)	growth rate	1.45225013401e-06	1.349651189863e-06	296.187044137173	290.65	2.52244846517829e-06
Leonella granifera strain GeoB*39	Meier et al. (2004)	growth rate	1.146e-06	1.04003836236015e-06	294.665853119528	290.65	4.51426207266159e-06
Leonella granifera	Meier et al. (2004)	growth rate	1.15546630931e-06	1.09666227293487e-06	296.192237077839	290.65	4.77830886136464e-06
Leptocylindrus danicus	Hulburt (1982)	growth rate	4.6172771786e-06	4.56798030269364e-06	299.356089806909	290.65	1.9899e-05
Mastigocladus laminosus strain NZ-86-m	Miyamoto et al. (1979)	growth rate	1.36683925456e-06	1.3668388573805e-06	324.570453108954	290.65	8.20215487026478e-06
Men. 5 (Diatom)	Hulburt (1982)	growth rate	1.5303e-05	1.05457120251976e-05	293.629026912133	290.65	1.74702643208213e-05
Microcystis aeruginosa strain NRC-1	Krï¿½ger & Eloff (1978)	growth rate	1.81681548276e-06	1.24675680219757e-06	292.366378051747	290.65	3.06858863767999e-06
Odontella mobiliensis	Hulburt (1982)	growth rate	5.2624598375e-06	5.10617566370969e-06	298.684119335019	290.65	1.61458026938911e-05
Olisthodiscus luteus clone OLMS	Tomas (1978)	growth rate	1.68474141588e-05	8.33773509705937e-06	290.530429857344	290.65	9.729e-06
Olisthodiscus luteus	Throndsen (1976)	growth rate	7.56318544637e-05	8.07047048672022e-06	284.877219925717	290.65	9.81025559761771e-06
Peridinium sp. strain 1	Barker (1935)	growth rate	8.19738280806e-06	6.83973928865632e-06	294.173424412973	290.65	7.07368509201658e-06
Peridinium sp.	Barker (1935)	growth rate	8.32768264933e-06	6.84343623451674e-06	294.026922754357	290.65	7.059e-06
Pernambugia tuberosa strain GeoB*74	Meier et al. (2004)	growth rate	2.58349599204e-06	2.374372115995e-06	297.446977608409	290.65	3.83841224894386e-06
Phaeodactylum tricornutum clone Pet Pd	Fawley (1984)	growth rate	1.37847619025e-05	1.37413793493671e-05	299.466312989796	290.65	1.71240920316839e-05
Phaeodactylum tricornutum	Ryther (1954)	growth rate	5.82892867161e-06	3.78928737234228e-06	292.63519521367	290.65	3.94492679677633e-06
Planktothrix agardhii	van Liere (1979)	growth rate	3.81423862251e-06	3.81423101681961e-06	308.565587871547	290.65	8.5036126583594e-06
Pleurochrysis carterae	Blankley & Lewin (1976)	growth rate	3.34084657295e-06	3.17259965005686e-06	296.622462198992	290.65	3.783e-06
Proboscia inermis	Boyd et al. (2013)	growth rate	7.58773258228e-06	2.94053870932161e-18	279.598496577874	290.65	3.776e-06
Prochlorococcus marinus eMED4	Johnson et al. (2006)	growth rate	3.419e-06	3.36007007114219e-06	298.939986334181	290.65	5.47242188034583e-06
Prochlorococcus marinus strain MIT9215 (clade 1)	Johnson (2006)	growth rate	2.28445579958e-06	1.94946204198514e-06	295.930249960388	290.65	5.40190142419993e-06
Prochlorococcus marinus strain MIT9215 (clade 1)	Johnson et al. (2006)	growth rate	2.33641261441e-06	1.99499615692455e-06	296.036240543343	290.65	5.41729689139512e-06
Prochlorococcus marinus strain MIT9312 (clade 1)	Johnson (2006)	growth rate	3.22519490062e-06	3.2249052030132e-06	301.310638630553	290.65	7.21935647266274e-06
Prochlorococcus marinus strain MIT9312 (clade 1)	Johnson et al. (2006)	growth rate	3.23882976455e-06	3.23855137679883e-06	301.303313258628	290.65	7.23474729793402e-06
Prochlorococcus marinus strain MIT9313	Zinser et al. (2007)	growth rate	2.50182954261e-06	2.50133085115334e-06	302.713981432173	290.65	5.3591487682745e-06
Prochlorococcus marinus strain MIT9515 (clade 2)	Johnson (2006)	growth rate	3.43985148796e-06	3.37913405672374e-06	298.932971330591	290.65	5.49866460537096e-06
Prochlorococcus marinus strain NATL2A	Zinser et al. (2007)	growth rate	3.474e-06	3.40859225208336e-06	299.048068969935	290.65	5.53388838092308e-06
Prorocentrum minimum	Grzebyk & Berland (1996)	growth rate	5.52454401549e-06	5.51893318025958e-06	301.405908787334	290.65	8.51161126844433e-06
Prorocentrum minimum	Grzebyk and Berland (1996)	growth rate	5.52135991168e-06	5.51547195604939e-06	301.384534459794	290.65	8.50519523918325e-06
Pseudo-nitzschia turgiduloides	Fiala & Oriol (1990)	growth rate	0.000796793	1.43372789804657e-07	277.276546964402	290.65	5.72956290905883e-06
Pseudopedinella pyriformis	Throndsen (1976)	growth rate	2.43311381741e-05	1.19524304173518e-05	290.577212307755	290.65	1.40423090585594e-05
Pyrodinium bahamense var. compressum	Usup et al. (1994)	growth rate	1.43694111228e-06	1.43688194877708e-06	306.716800884567	290.65	3.08230903255395e-06
Pyrodinium bahamense var. compressum strain PbSA01	Usup et al. (1994)	growth rate	1.49338870282e-06	1.49333416716746e-06	306.77459671142	290.65	3.05794092942067e-06
Rhizosolenia fragilissimus	Ignatiades & Smayda (1970)	growth rate	0.000413835	8.59952901465319e-06	282.662722202765	290.65	8.69851698106894e-06
Rhizosolenia setigera	Hulburt (1982)	growth rate	1.13411901184e-05	1.96217470953913e-06	288.297858365486	290.65	6.495e-06
Rhizosolenia setigera	Hulburt (1982)	growth rate	3.15766356134e-05	1.18738771983126e-05	289.619094389684	290.65	1.41998998042714e-05
Scrippsiella trochoidea strain ScrpMxB	Binder & Anderson (1987)	growth rate	5.25210162811e-06	5.25120988848942e-06	295.669200233847	290.65	5.59451051918601e-06
Skeletonema marinoionohrnii complex	Kaeriyama et al. (2011)	growth rate	2.18656694002e-05	1.6104726516789e-05	299.17576777486	290.65	1.85680516548347e-05
Skeletonema tropicum clone fall	Hulburt (1982)	growth rate	0.0008977345	1.63031395494895e-05	287.245070337532	290.65	1.65987653032085e-05
Skeletonema tropicum	Kaeriyama et al. (2011)	growth rate	1.4437320841e-05	1.13036290020478e-05	297.378146049424	290.65	1.63534616878868e-05
Synechococcus sp. strain UV-005, PCC 6311	Krï¿½ger & Eloff (1978)	growth rate	8.16682818024e-06	2.4963227215435e-06	289.270181494393	290.65	3.59334775386203e-06
Thalassiosira pseudonana strain CCMP1011, STX97	Boyd et al. (2013)	growth rate	8.8724712111e-06	8.86524667035067e-06	299.544600955787	290.65	1.37492702293162e-05
Thalassiosira pseudonana strain CCMP1012, SWAN1	Boyd et al. (2013)	growth rate	1.00207102946e-05	9.92015120037308e-06	298.169420521828	290.65	1.71760522139357e-05
Thalassiosira pseudonana strain CCMP1013, W	Boyd et al. (2013)	growth rate	7.90943950904e-06	7.90926917116423e-06	302.657067745342	290.65	2.23890653948327e-05
Thalassiosira pseudonana strain CCMP1014, FCRG66	Boyd et al. (2013)	growth rate	9.86247796486e-06	9.86247075381816e-06	303.810143257188	290.65	1.90359444906097e-05
Thalassiosira pseudonana strain CCMP1015, ARC5	Boyd et al. (2013)	growth rate	1.02557536116e-05	1.02555157863831e-05	304.114509291902	290.65	1.83244221118268e-05
Thalassiosira pseudonana	Thompson et al. (1992)	growth rate	1.77387729825e-05	1.52334420527995e-05	298.463203766054	290.65	2.09368989483587e-05
Thalassiosira rotula strain CCAP1085_21	Boyd et al. (2013)	growth rate	3.12740933731e-05	8.9741808670233e-06	286.733428501875	290.65	8.97839048112713e-06
Thalassiosira rotula strain CCMP3096	Boyd et al. (2013)	growth rate	3.07189447667e-05	8.10020546644332e-06	285.456439997476	290.65	8.10412542416321e-06
Thalassiosira rotula strain CCMP3264	Boyd et al. (2013)	growth rate	0.0001081633	9.19154705378343e-06	282.991301356933	290.65	9.2742794273355e-06
Thalassiosira rotula strain JpnTR18	Boyd et al. (2013)	growth rate	4.51942351724e-05	7.37997903885137e-06	282.412378356017	290.65	7.44632670645771e-06
Thalassiosira rotula	Baars (1981)	growth rate	0.0021957947	1.37048775186892e-05	279.745097422329	290.65	1.75083009415578e-05
Trichodesmium erythraeum strain 21_75	Boyd et al. (2013)	growth rate	4.59e-07	4.45385194191756e-07	297.652507513447	290.65	3.10353618144403e-06
Trichodesmium erythraeum strain KO4_20	Boyd et al. (2013)	growth rate	6.39744876084e-07	6.30299108441936e-07	299.074651851259	290.65	3.62462609970697e-06
Trichodesmium radians strain H94	Chappell & Webb (2010)	growth rate	4.9e-08	4.89624416911023e-08	298.661417605787	290.65	4.24985355468585e-06
Akashiwo sanguinea strain BWA	Boyd et al. (2013)	growth rate	4.17e-06	3.83844753136048e-06	300.30827566904	293.15	4.219e-06
Akashiwo sanguinea strain GBB	Boyd et al. (2013)	growth rate	4.44345794344e-06	4.2638977734792e-06	302.229177652352	293.15	4.96365272988767e-06
Akashiwo sanguinea strain RMB	Boyd et al. (2013)	growth rate	3.55908456061e-06	3.47049963295617e-06	300.976802449538	293.15	4.2867886296188e-06
Akashiwo sanguinea strain YRB	Boyd et al. (2013)	growth rate	3.80650378759e-06	3.80615119236139e-06	304.168562855623	293.15	4.71375309260081e-06
Alexandrium minutum	Cannon (1993)	growth rate	0.0002066658	3.48100130298647e-06	286.476432805336	293.15	3.48128005480202e-06
Alexandrium ostenfeldii clone LF-37	Jensen & Moestrup (1997)	growth rate	4.21207005611e-06	2.54536988245606e-06	293.99218859191	293.15	2.5457113143232e-06
Alexandrium ostenfeldii clone LF-37	Jensen and Moestrup (1997)	growth rate	4.19280069197e-06	2.50016860734796e-06	293.958950113214	293.15	2.50084352913059e-06
Alexandrium tamarense clone GTMP	Watras et al. (1982)	growth rate	0.0016379764	3.49386947112586e-06	283.307326363792	293.15	4.048e-06
Amphidinium klebsii	Morton et al. (1992)	growth rate	1.05968471359e-06	1.05342885987817e-06	301.654306845602	293.15	4.38112826782497e-06
Amphiprora sp.	Hulburt (1982)	growth rate	4.98107091369e-06	4.85806227519877e-06	302.007899580822	293.15	1.01726823910674e-05
Apedinella radians	Throndsen (1976)	growth rate	0.0006806583	1.37538679605643e-05	284.64564993811	293.15	1.386e-05
Biceratium furca	Baek et al. (2008)	growth rate	0.0001453749	5.56850796128159e-06	288.693241324238	293.15	5.57268829904419e-06
Ceratium furca	Baek et al. (2008)	growth rate	4.33447117231e-05	5.95816278021265e-06	289.76914922584	293.15	6.04766062577051e-06
Chaetoceros didymus	Hulburt (1982)	growth rate	0.4359268368	1.50783703051651e-05	286.520468973945	293.15	1.57321946977174e-05
Chaetoceros gracilis	Thompson et al. (1992)	growth rate	4.66828685526e-05	1.8372869760731e-05	291.622769756483	293.15	1.86132261004063e-05
Chaetoceros lorenzianus clone Bushehr	Hulburt (1982)	growth rate	1.15743847329e-05	1.15127313817082e-05	302.421280648862	293.15	1.94180575362437e-05
Chaetoceros sp.	Thomas (1966)	growth rate	6.31472733438e-05	2.60307565248148e-05	292.35389103152	293.15	4.08935000355754e-05
Chattonella marina	Kahn (1998)	growth rate	5.98425078059e-06	4.4172619104263e-06	296.692872875611	293.15	4.96509194203524e-06
Chlamydomonas alpina	Seaburg et al. (1981)	growth rate	6.16639426967e-05	8.07651197840965e-07	287.640465180271	293.15	1.0833e-05
Chlamydomonas reinhardtii	McCombie (1960)	growth rate	3.09756316047e-06	7.85881436585949e-07	289.979518903414	293.15	8.20100361173565e-07
Chlamydomonas subcaudata	Seaburg et al. (1981)	growth rate	2.44066011668e-05	3.76605674627303e-07	288.32257278673	293.15	1.1255632416796e-05
Chlorella MFD1	James et al. (1989)	growth rate	2.69850156706e-06	2.05705062888575e-06	299.358247536719	293.15	2.13586271913115e-06
Chlorella sorokiniana strain CCAP 211/8K, 7-11-05	Sorokin (1960)	growth rate	4.54371020386e-06	4.52364259302432e-06	305.611553627409	293.15	8.01894295237301e-05
Chlorella sp. strain MFD-1	James et al. (1989)	growth rate	1.86060057219e-06	1.45258464678731e-06	299.855699827651	293.15	1.50626091105726e-06
Chrysochromulina polylepis strain B3	Edvardsen (1992)	growth rate	2.04718443642e-05	6.30720231156469e-06	291.556258698665	293.15	1.00283280925966e-05
Chrysochromulina polylepis strain B4	Edvardsen (1992)	growth rate	1.44822006506e-05	6.2099326284623e-06	292.641339159526	293.15	8.6033473487374e-06
Chrysochromulina polylepis strain K	Edvardsen (1992)	growth rate	2.20387165353e-05	9.72776255096684e-06	292.357668947299	293.15	9.9221572558121e-06
Cochlodinium polykrikoides strain KG8-ND14	Yamatogi (2005)	growth rate	4.09857231497e-06	3.83973949212169e-06	301.624340199324	293.15	6.42953664493754e-06
Conticribra guillardii clone 7-15	Guillard & Ryther (1962)	growth rate	0.0001925233	1.56094626708503e-05	285.181512029356	293.15	1.83323117382215e-05
Conticribra weissflogii strain CCMP1053, SA	Boyd et al. (2013)	growth rate	1.98536367945e-05	7.74944374112102e-06	292.241441353417	293.15	8.41706798154217e-06
Cosmarium beatum SVCK 533	Stamenkovi? et al. (2013)	growth rate	7.34975764083e-06	3.75144192021418e-06	293.244360519524	293.15	4.08553511965098e-06
Cosmarium beatum	Stamenkovi? and Hanelt (2013)	growth rate	7.34975764083e-06	3.75144192021418e-06	293.244360519524	293.15	4.08553511965098e-06
Cosmarium crenatum var. boldtianum strain SVCK 561, ASW Wien #07 141	Stamenkovi? et al. (2013)	growth rate	3.88509345199e-06	3.43071323991279e-06	297.584553749458	293.15	3.55149581614642e-06
Cosmarium crenatum	Stamenkovi? and Hanelt (2013)	growth rate	3.88509345199e-06	3.43071323991279e-06	297.584553749458	293.15	3.55149581614642e-06
Cosmarium meneghinii strain SVCK 59, 1927/Praha Ac. A 231	Stamenkovi? et al. (2013)	growth rate	9.84655100439e-06	7.42284433144883e-06	295.20877577827	293.15	7.83780735415455e-06
Cosmarium meneghinii	Stamenkovi? and Hanelt (2013)	growth rate	9.84655100439e-06	7.42284433144883e-06	295.20877577827	293.15	7.83780735415455e-06
Cosmarium punctulatum #571	Stamenkovi? and Hanelt (2013)	growth rate	4.4273797989e-06	3.43935386173345e-06	295.636404286819	293.15	3.56617892728308e-06
Cosmarium punctulatum var. subpunctulatum strain SVCK 571, ASW Wien #07 136	Stamenkovi? et al. (2013)	growth rate	4.4273797989e-06	3.43935386173345e-06	295.636404286819	293.15	3.56617892728308e-06
Crocosphaera watsonii strain 3A	Boyd et al. (2013)	growth rate	1.68188174222e-06	1.68186642582135e-06	305.64315729012	293.15	4.4851807291605e-06
Crocosphaera watsonii strain WH005	Boyd et al. (2013)	growth rate	1.334e-06	1.21848101361407e-06	297.906171158399	293.15	6.06670071951952e-06
Crocosphaera watsonii strain WH84	Boyd et al. (2013)	growth rate	4.61693804552e-07	4.38613797616201e-07	297.051944493925	293.15	5.90036647861749e-06
Cryptomonas marssonii	Butterwick et al. (2005)	growth rate	0.0001918083	5.70155139308383e-06	281.234847871655	293.15	6.47384623254867e-06
Cryptomonas marssonii	Butterwick et al. (2005)	growth rate	0.0002240698	5.68611665453889e-06	281.036516289342	293.15	6.48187178065694e-06
Cryptomonas sp. strain F	Throndsen (1976)	growth rate	1.1682e-05	1.11233784062272e-05	298.864374125329	293.15	1.1287e-05
Cylindrotheca closterium	Maddux & Jones (1964)	growth rate	1.96152334171e-05	6.84505742548345e-06	291.27159259706	293.15	6.86779846677608e-06
Dactyliosolen fragilissimus	Ignatiades & Smayda (1970)	growth rate	0.0012552031	8.27231660097261e-06	282.662722174086	293.15	8.69851696682628e-06
Desmodesmus quadricaudatus strain A 119, Greifswald/15	Komï¿½rek & Ruzicka (1969)	growth rate	2.22908181051e-05	9.47450178921478e-06	292.122052227037	293.15	1.42223708657804e-05
Diacronema lutheri strain NEPCC 5	Thompson (1992)	growth rate	1.64101539815e-05	1.64101539697884e-05	298.59046126213	293.15	2.51631776309256e-05
Dinobryon divergens	Butterwick et al. (2005)	growth rate	1.53974744917e-05	4.75997079223533e-06	290.139441225911	293.15	5.43293889038867e-06
Dinobryon divergens	Butterwick et al. (2005)	growth rate	1.5553e-05	4.73731497859328e-06	290.077790179695	293.15	5.43643212566028e-06
Ditylum brightwellii	Paasche (1968)	growth rate	1.75741287144e-05	1.70411837131867e-05	301.957182744327	293.15	2.07353012854901e-05
Dunaliella sp.	Van Auken & McNulty (1973)	growth rate	3.08637078346e-06	3.08633374470282e-06	308.085482194089	293.15	8.58417871318034e-06
Emiliania huxleyi strain B92/21	Conte et al. (1998)	growth rate	1.29257707181e-05	1.0942721223704e-05	297.445785975289	293.15	1.09885279054739e-05
Emiliania huxleyi strain G1779Ga	Conte et al. (1998)	growth rate	2.25765594703e-05	1.3048914456461e-05	294.303738967529	293.15	1.31791515146447e-05
Emiliania huxleyi strain S. Africa	Conte et al. (1998)	growth rate	1.00158430357e-05	8.77356838066094e-06	298.373699495735	293.15	1.02504812246471e-05
Emiliania huxleyi strain Van556	Conte et al. (1998)	growth rate	9.30567029867e-06	9.30316754332371e-06	297.517674050517	293.15	9.64748063041077e-06
Eutreptiella gymnastica	Throndsen (1976)	growth rate	2.55636046658e-05	1.72547951119373e-05	294.915413166854	293.15	1.81208156531472e-05
Fibrocapsa japonica strain CAWR-19	de Boer et al. (2005)	growth rate	3.2827915631e-06	3.20190404931438e-06	301.386627069215	293.15	3.84319473248515e-06
Fibrocapsa japonica strain CCRuG-C13	de Boer et al. (2005)	growth rate	1.03062772217e-05	4.38217460457502e-06	291.998424582037	293.15	4.49462121101277e-06
Fibrocapsa japonica strain CS-332	de Boer et al. (2005)	growth rate	5.33530413485e-06	3.94489415843137e-06	295.569683369719	293.15	4.41723358597984e-06
Gephyrocapsa oceanica strain AB1, CAWPOT	Conte et al. (1998)	growth rate	1.0990220525e-05	9.72205271560713e-06	299.217082242251	293.15	1.10067574056357e-05
Gephyrocapsa oceanica var. typica strain A4725	Bollmann et al. (2010)	growth rate	1.09530786411e-05	9.85047894439384e-06	300.026318534268	293.15	1.46018978114214e-05
Gephyrocapsa oceanica var. typica strain A4727	Bollmann et al. (2010)	growth rate	1.1531e-05	9.92063500866112e-06	299.12110290039	293.15	1.44849044074078e-05
Gymnodinium isolate 582 (probably G. simplex)	Thomas (1966)	growth rate	9.76860374291e-06	9.22436366541086e-06	299.956458539656	293.15	1.32949473583475e-05
Gymnodinium sp. isolate 581 (probably G. simplex)	Thomas (1966)	growth rate	6.44282881824e-06	6.07409534377891e-06	301.351454731749	293.15	8.91206538302432e-06
Gyrodinium uncatenum strain GYRO	Anderson (1985)	growth rate	7.42687872462e-06	4.15072231531466e-06	294.038263570049	293.15	5.242e-06
Heterocapsa rotundata	Throndsen (1976)	growth rate	2.05972923684e-05	1.8231941447346e-05	296.589708679277	293.15	1.82407093638485e-05
Heteromastix pyriformis	Throndsen (1976)	growth rate	2.08132387555e-05	1.85563774896431e-05	295.802326975364	293.15	1.8576717592415e-05
Karenia brevis strain APA	McKay et al. (2006)	growth rate	2.56233310469e-06	2.05598937334068e-06	296.187045821128	293.15	2.52244884880575e-06
Leonella granifera strain GeoB*39	Meier et al. (2004)	growth rate	3.657e-06	2.56562275427384e-06	294.665856905302	293.15	4.5142638088401e-06
Leonella granifera	Meier et al. (2004)	growth rate	2.92031414618e-06	2.42662000097915e-06	296.192236905093	293.15	4.77830884330531e-06
Leptocylindrus danicus	Hulburt (1982)	growth rate	8.68049720935e-06	8.3408185964431e-06	299.356089806909	293.15	1.9899e-05
Mastigocladus laminosus strain NZ-86-m	Miyamoto et al. (1979)	growth rate	1.6368175878e-06	1.6368159634662e-06	324.57045306783	293.15	8.20215470173589e-06
Men. 5 (Diatom)	Hulburt (1982)	growth rate	2.6105e-05	1.38796885009419e-05	293.629051044325	293.15	1.74702695314908e-05
Microcystis aeruginosa strain NRC-1	Krï¿½ger & Eloff (1978)	growth rate	5.31537517863e-06	2.19182422751849e-06	292.366377280576	293.15	3.0685885479287e-06
Odontella mobiliensis	Hulburt (1982)	growth rate	9.35145330876e-06	8.5601092254438e-06	298.684119396003	293.15	1.61458026721841e-05
Olisthodiscus luteus clone OLMS	Tomas (1978)	growth rate	2.3382e-05	9.14082284824146e-06	290.530450047173	293.15	9.729e-06
Olisthodiscus luteus	Throndsen (1976)	growth rate	0.0001363836	6.35175625717447e-06	284.877219925717	293.15	9.81025559761864e-06
Peridinium sp. strain 1	Barker (1935)	growth rate	1.11702279873e-05	6.86253099577904e-06	294.173424285781	293.15	7.07368508649533e-06
Peridinium sp.	Barker (1935)	growth rate	1.1436667088e-05	6.82913996982269e-06	294.026923134781	293.15	7.059e-06
Pernambugia tuberosa strain GeoB*74	Meier et al. (2004)	growth rate	3.87052543686e-06	3.17753295169204e-06	297.446970140907	293.15	3.83841229768662e-06
Phaeodactylum tricornutum clone Pet Pd	Fawley (1984)	growth rate	1.6027e-05	1.57631701707697e-05	299.466313204341	293.15	1.71240916968993e-05
Phaeodactylum tricornutum	Ryther (1954)	growth rate	6.91611426289e-06	3.18328068394838e-06	292.63519512891	293.15	3.94492680244816e-06
Planktothrix agardhii	van Liere (1979)	growth rate	4.47480699557e-06	4.47474565287012e-06	308.565587871547	293.15	8.50361265835952e-06
Pleurochrysis carterae	Blankley & Lewin (1976)	growth rate	4.409e-06	3.72390595623656e-06	296.622462163415	293.15	3.783e-06
Proboscia inermis	Boyd et al. (2013)	growth rate	8.62982084056e-06	7.02135916962243e-21	279.598496358808	293.15	3.776e-06
Prochlorococcus marinus eMED4	Johnson et al. (2006)	growth rate	4.70856687126e-06	4.43863472268974e-06	298.939986191675	293.15	5.47242189347825e-06
Prochlorococcus marinus strain MIT9215 (clade 1)	Johnson (2006)	growth rate	4.42172000903e-06	3.16119838001159e-06	295.930242271757	293.15	5.40190178064549e-06
Prochlorococcus marinus strain MIT9215 (clade 1)	Johnson et al. (2006)	growth rate	4.44389100089e-06	3.19368868883101e-06	296.036232363444	293.15	5.4172964924577e-06
Prochlorococcus marinus strain MIT9312 (clade 1)	Johnson (2006)	growth rate	4.29372952241e-06	4.29008817212068e-06	301.310638628721	293.15	7.21935646973915e-06
Prochlorococcus marinus strain MIT9312 (clade 1)	Johnson et al. (2006)	growth rate	4.30845067466e-06	4.30491157647749e-06	301.303313237138	293.15	7.23474728323001e-06
Prochlorococcus marinus strain MIT9313	Zinser et al. (2007)	growth rate	3.20644838639e-06	3.20249488492843e-06	302.713981413924	293.15	5.35914878714971e-06
Prochlorococcus marinus strain MIT9515 (clade 2)	Johnson (2006)	growth rate	4.7391862978e-06	4.46290592144258e-06	298.932971247156	293.15	5.49866457865227e-06
Prochlorococcus marinus strain NATL2A	Zinser et al. (2007)	growth rate	4.76776697561e-06	4.48205532065275e-06	299.048069180131	293.15	5.53388838867625e-06
Prorocentrum minimum	Grzebyk & Berland (1996)	growth rate	6.6687070169e-06	6.63370097130808e-06	301.405908748317	293.15	8.5116112892021e-06
Prorocentrum minimum	Grzebyk and Berland (1996)	growth rate	6.67065999346e-06	6.63421139462745e-06	301.384534552351	293.15	8.50519521787568e-06
Pseudo-nitzschia turgiduloides	Fiala & Oriol (1990)	growth rate	0.0016868725	6.60887252291583e-08	277.276548674045	293.15	5.7295629140875e-06
Pseudopedinella pyriformis	Throndsen (1976)	growth rate	3.2086e-05	7.26798121204382e-06	290.577212307755	293.15	1.40423090585584e-05
Pyrodinium bahamense var. compressum	Usup et al. (1994)	growth rate	1.72138359613e-06	1.72101685302794e-06	306.716800919878	293.15	3.08230903327125e-06
Pyrodinium bahamense var. compressum strain PbSA01	Usup et al. (1994)	growth rate	1.77e-06	1.76966085337122e-06	306.774596671052	293.15	3.05794092777871e-06
Rhizosolenia fragilissimus	Ignatiades & Smayda (1970)	growth rate	0.0012552031	8.27231660097261e-06	282.662722174086	293.15	8.69851696682628e-06
Rhizosolenia setigera	Hulburt (1982)	growth rate	1.38175389403e-05	5.41349152521413e-07	288.297857949569	293.15	6.495e-06
Rhizosolenia setigera	Hulburt (1982)	growth rate	9.2828e-05	1.41013039307492e-05	289.619095222572	293.15	1.41999001747862e-05
Scrippsiella trochoidea strain ScrpMxB	Binder & Anderson (1987)	growth rate	5.66535555561e-06	5.59098470793959e-06	295.66920009359	293.15	5.59451018799909e-06
Skeletonema marinoionohrnii complex	Kaeriyama et al. (2011)	growth rate	2.5618e-05	1.72329486669735e-05	299.175766064938	293.15	1.85680516226153e-05
Skeletonema tropicum clone fall	Hulburt (1982)	growth rate	0.018134124	1.65891192052633e-05	287.238466206853	293.15	1.6597411331103e-05
Synechococcus sp. strain UV-005, PCC 6311	Krï¿½ger & Eloff (1978)	growth rate	3.82531564876e-05	3.2796568950976e-06	289.209057609277	293.15	3.58621213527089e-06
Thalassiosira pseudonana strain CCMP1011, STX97	Boyd et al. (2013)	growth rate	1.11176776178e-05	1.10482486366652e-05	299.544600961833	293.15	1.37492702249636e-05
Thalassiosira pseudonana strain CCMP1012, SWAN1	Boyd et al. (2013)	growth rate	1.44667764976e-05	1.38056363076245e-05	298.169420531103	293.15	1.71760522328333e-05
Thalassiosira pseudonana strain CCMP1013, W	Boyd et al. (2013)	growth rate	1.07634820047e-05	1.07611473175589e-05	302.657067775071	293.15	2.23890657168233e-05
Thalassiosira pseudonana strain CCMP1014, FCRG66	Boyd et al. (2013)	growth rate	1.1759e-05	1.17588611955071e-05	303.810143219403	293.15	1.90359446286581e-05
Thalassiosira pseudonana strain CCMP1015, ARC5	Boyd et al. (2013)	growth rate	1.21052438048e-05	1.21030513929787e-05	304.114508542868	293.15	1.83244214307464e-05
Thalassiosira pseudonana	Thompson et al. (1992)	growth rate	2.34567160685e-05	1.8097818232969e-05	298.463203838372	293.15	2.09368989027636e-05
Thalassiosira rotula strain CCAP1085_21	Boyd et al. (2013)	growth rate	4.65302049259e-05	8.63833642611812e-06	286.733427872389	293.15	8.97838955918492e-06
Thalassiosira rotula strain CCMP3096	Boyd et al. (2013)	growth rate	4.34955974891e-05	7.88148569022241e-06	285.456439371157	293.15	8.10412469389249e-06
Thalassiosira rotula strain CCMP3264	Boyd et al. (2013)	growth rate	0.0002083397	8.7648901974011e-06	282.991301980388	293.15	9.27428104032598e-06
Thalassiosira rotula strain JpnTR18	Boyd et al. (2013)	growth rate	6.57682620792e-05	7.10115144348312e-06	282.412378356017	293.15	7.44632670645686e-06
Thalassiosira rotula	Baars (1981)	growth rate	0.005833947	1.20596269079213e-05	279.745102602506	293.15	1.75083100357079e-05
Trichodesmium erythraeum strain 21_75	Boyd et al. (2013)	growth rate	1.13840720235e-06	1.02722706107091e-06	297.652507643189	293.15	3.10353618749876e-06
Trichodesmium erythraeum strain KO4_20	Boyd et al. (2013)	growth rate	1.32951835994e-06	1.26205464057877e-06	299.074651783866	293.15	3.62462610064125e-06
Trichodesmium radians strain H94	Chappell & Webb (2010)	growth rate	2.45463337998e-07	2.43635411671233e-07	298.661417605787	293.15	4.24985355463065e-06
Akashiwo sanguinea strain BWA	Boyd et al. (2013)	growth rate	5.04757234996e-06	4.18564424516835e-06	300.30827566904	295.65	4.219e-06
Akashiwo sanguinea strain GBB	Boyd et al. (2013)	growth rate	5.25030220598e-06	4.76127440542351e-06	302.229176982331	295.65	4.96365278237014e-06
Akashiwo sanguinea strain RMB	Boyd et al. (2013)	growth rate	4.40450531492e-06	4.06269242938831e-06	300.976802397832	295.65	4.286788624322e-06
Akashiwo sanguinea strain YRB	Boyd et al. (2013)	growth rate	4.16637263265e-06	4.16300241770618e-06	304.168563550083	295.65	4.7137531431852e-06
Alexandrium minutum	Cannon (1993)	growth rate	0.0008800677	3.43183666722263e-06	286.476433407062	295.65	3.48128133681225e-06
Alexandrium ostenfeldii clone LF-37	Jensen & Moestrup (1997)	growth rate	6.97652799143e-06	2.12362008446329e-06	293.992188557751	295.65	2.54571131045854e-06
Alexandrium ostenfeldii clone LF-37	Jensen and Moestrup (1997)	growth rate	6.89589269175e-06	2.12534915913802e-06	293.958950322836	295.65	2.50084353621874e-06
Alexandrium tamarense clone GTMP	Watras et al. (1982)	growth rate	0.0066768788	3.19468419670231e-06	283.307340650136	295.65	4.04805168178529e-06
Amphidinium klebsii	Morton et al. (1992)	growth rate	1.98689345877e-06	1.93346445857425e-06	301.65430681838	295.65	4.38112824110601e-06
Amphiprora sp.	Hulburt (1982)	growth rate	7.40462707178e-06	6.90039493596966e-06	302.00789998611	295.65	1.01726825794532e-05
Apedinella radians	Throndsen (1976)	growth rate	0.0019541205	1.33431458291816e-05	284.64564993811	295.65	1.386e-05
Biceratium furca	Baek et al. (2008)	growth rate	0.0008042149	5.44380735510584e-06	288.693238176464	295.65	5.57268680040804e-06
Ceratium furca	Baek et al. (2008)	growth rate	0.0001471167	5.94410046195984e-06	289.769153249159	295.65	6.04766188145124e-06
Chaetoceros didymus	Hulburt (1982)	growth rate	17.9745417058	1.45650121936561e-05	286.520470918681	295.65	1.57321987543246e-05
Chaetoceros gracilis	Thompson et al. (1992)	growth rate	7.52586548891e-05	1.83694283448955e-05	291.62277153269	295.65	1.86132264530169e-05
Chaetoceros lorenzianus clone Bushehr	Hulburt (1982)	growth rate	1.52819246608e-05	1.49433246721166e-05	302.42128048862	295.65	1.94180578186486e-05
Chaetoceros sp.	Thomas (1966)	growth rate	0.0001865223	3.52538200419134e-05	292.353885966871	295.65	4.08934921515127e-05
Chattonella marina	Kahn (1998)	growth rate	8.564e-06	4.92472189671487e-06	296.692872875611	295.65	4.96509194130573e-06
Chlamydomonas alpina	Seaburg et al. (1981)	growth rate	0.0001028106	2.02038495223027e-07	287.640464585997	295.65	1.0833e-05
Chlamydomonas reinhardtii	McCombie (1960)	growth rate	6.37588249501e-06	8.19958955120971e-07	289.979517735902	295.65	8.20100332446975e-07
Chlamydomonas subcaudata	Seaburg et al. (1981)	growth rate	3.04412223432e-05	5.8375851986455e-08	288.322572667995	295.65	1.12556327029897e-05
Chlorella MFD1	James et al. (1989)	growth rate	3.20212712884e-06	2.13262317800715e-06	299.358251938707	295.65	2.13586268422509e-06
Chlorella sorokiniana strain CCAP 211/8K, 7-11-05	Sorokin (1960)	growth rate	9.42523184115e-06	9.29835882821309e-06	305.61155354143	295.65	8.01894295322861e-05
Chlorella sp. strain MFD-1	James et al. (1989)	growth rate	2.1870934242e-06	1.50418897486297e-06	299.855677959394	295.65	1.50626100509719e-06
Chrysochromulina polylepis strain B3	Edvardsen (1992)	growth rate	2.71042676304e-05	3.06239741718059e-06	291.556259361281	295.65	1.00283288531851e-05
Chrysochromulina polylepis strain B4	Edvardsen (1992)	growth rate	1.85839327032e-05	2.91503291905555e-06	292.641339159628	295.65	8.6033473487104e-06
Chrysochromulina polylepis strain K	Edvardsen (1992)	growth rate	3.0887611048e-05	8.48850284099118e-06	292.357669586682	295.65	9.92215812438874e-06
Cochlodinium polykrikoides strain KG8-ND14	Yamatogi (2005)	growth rate	5.75927722497e-06	5.0002921915771e-06	301.62434068892	295.65	6.42953669960883e-06
Conticribra guillardii clone 7-15	Guillard & Ryther (1962)	growth rate	0.0003284953	1.33374269743302e-05	285.181510077954	295.65	1.83323113087171e-05
Conticribra weissflogii strain CCMP1053, SA	Boyd et al. (2013)	growth rate	3.25682268256e-05	5.20835923966621e-06	292.241441995725	295.65	8.41706906765876e-06
Cosmarium beatum SVCK 533	Stamenkovi? et al. (2013)	growth rate	1.57107867556e-05	4.06217509872097e-06	293.244360734208	295.65	4.08553515919967e-06
Cosmarium beatum	Stamenkovi? and Hanelt (2013)	growth rate	1.57107867556e-05	4.06217509872097e-06	293.244360734208	295.65	4.08553515919967e-06
Cosmarium crenatum var. boldtianum strain SVCK 561, ASW Wien #07 141	Stamenkovi? et al. (2013)	growth rate	4.94046629201e-06	3.4863445029618e-06	297.584553757437	295.65	3.55149582640077e-06
Cosmarium crenatum	Stamenkovi? and Hanelt (2013)	growth rate	4.94046629201e-06	3.4863445029618e-06	297.584553757437	295.65	3.55149582640077e-06
Cosmarium meneghinii strain SVCK 59, 1927/Praha Ac. A 231	Stamenkovi? et al. (2013)	growth rate	1.6852e-05	7.42865991217823e-06	295.208778365627	295.65	7.837808020485e-06
Cosmarium meneghinii	Stamenkovi? and Hanelt (2013)	growth rate	1.6852e-05	7.42865991217823e-06	295.208778365627	295.65	7.837808020485e-06
Cosmarium punctulatum #571	Stamenkovi? and Hanelt (2013)	growth rate	6.79065165928e-06	3.3838446510815e-06	295.636403878005	295.65	3.56617892017579e-06
Cosmarium punctulatum var. subpunctulatum strain SVCK 571, ASW Wien #07 136	Stamenkovi? et al. (2013)	growth rate	6.79065165928e-06	3.3838446510815e-06	295.636403878005	295.65	3.56617892017579e-06
Crocosphaera watsonii strain 3A	Boyd et al. (2013)	growth rate	2.2183865191e-06	2.21816360802084e-06	305.643157836519	295.65	4.48518098090598e-06
Crocosphaera watsonii strain WH005	Boyd et al. (2013)	growth rate	3.77586085441e-06	2.83861340621981e-06	297.906171705832	295.65	6.06670206925378e-06
Crocosphaera watsonii strain WH84	Boyd et al. (2013)	growth rate	2.74915381148e-06	2.03600223402764e-06	297.051945043874	295.65	5.90036875308197e-06
Cryptomonas marssonii	Butterwick et al. (2005)	growth rate	0.0003469311	5.2210836268971e-06	281.234848780102	295.65	6.47384627931137e-06
Cryptomonas marssonii	Butterwick et al. (2005)	growth rate	0.0004147471	5.21262573336754e-06	281.036515417968	295.65	6.48187174811462e-06
Cryptomonas sp. strain F	Throndsen (1976)	growth rate	1.3131e-05	1.10479583543204e-05	298.864374763709	295.65	1.1287e-05
Cylindrotheca closterium	Maddux & Jones (1964)	growth rate	3.44694283894e-05	6.59587370435128e-06	291.271591982659	295.65	6.86779749482143e-06
Dactyliosolen fragilissimus	Ignatiades & Smayda (1970)	growth rate	0.0037363776	7.88634900571789e-06	282.662721817024	295.65	8.69851450220946e-06
Desmodesmus quadricaudatus strain A 119, Greifswald/15	Komï¿½rek & Ruzicka (1969)	growth rate	4.48473791495e-05	1.18151699963964e-05	292.122055095931	295.65	1.42223715693924e-05
Diacronema lutheri strain NEPCC 5	Thompson (1992)	growth rate	2.11635499225e-05	2.1163330822259e-05	298.581836154864	295.65	2.51882404567689e-05
Dinobryon divergens	Butterwick et al. (2005)	growth rate	2.0569e-05	3.87825927667375e-06	290.139441925723	295.65	5.43293890111194e-06
Dinobryon divergens	Butterwick et al. (2005)	growth rate	2.08109369244e-05	3.84436867105699e-06	290.077790181343	295.65	5.43643212097403e-06
Ditylum brightwellii	Paasche (1968)	growth rate	2.11984360782e-05	1.95305506843748e-05	301.957181989309	295.65	2.07353003819577e-05
Dunaliella sp.	Van Auken & McNulty (1973)	growth rate	3.93746280473e-06	3.93712183866323e-06	308.085482201873	295.65	8.58417877758673e-06
Emiliania huxleyi strain B92/21	Conte et al. (1998)	growth rate	1.55883283512e-05	1.04434779623928e-05	297.445786287935	295.65	1.09885281493503e-05
Emiliania huxleyi strain G1779Ga	Conte et al. (1998)	growth rate	3.15222845187e-05	1.29247456845549e-05	294.303738320378	295.65	1.31791514721237e-05
Emiliania huxleyi strain S. Africa	Conte et al. (1998)	growth rate	1.38026641528e-05	1.01193515230083e-05	298.373699412377	295.65	1.02504811944023e-05
Emiliania huxleyi strain Van556	Conte et al. (1998)	growth rate	9.87928892146e-06	9.58561867463428e-06	297.517674674194	295.65	9.64748076046092e-06
Eutreptiella gymnastica	Throndsen (1976)	growth rate	3.09602905691e-05	1.31640089035341e-05	294.91541324691	295.65	1.81208157090736e-05
Fibrocapsa japonica strain CAWR-19	de Boer et al. (2005)	growth rate	3.95775972664e-06	3.66852028515716e-06	301.386627161075	295.65	3.84319474338398e-06
Fibrocapsa japonica strain CCRuG-C13	de Boer et al. (2005)	growth rate	1.60406370152e-05	4.48025310021237e-06	291.998422759348	295.65	4.49462117616816e-06
Fibrocapsa japonica strain CS-332	de Boer et al. (2005)	growth rate	8.977e-06	4.41148095326902e-06	295.56968341015	295.65	4.41723358476107e-06
Gephyrocapsa oceanica strain AB1, CAWPOT	Conte et al. (1998)	growth rate	1.41933404332e-05	1.08760210872073e-05	299.217080226719	295.65	1.10067571818398e-05
Gephyrocapsa oceanica var. typica strain A4725	Bollmann et al. (2010)	growth rate	1.56929126156e-05	1.25432994255826e-05	300.026315516801	295.65	1.46018974621328e-05
Gephyrocapsa oceanica var. typica strain A4727	Bollmann et al. (2010)	growth rate	1.70342581336e-05	1.26119602466397e-05	299.121098788763	295.65	1.44849028671488e-05
Gymnodinium isolate 582 (probably G. simplex)	Thomas (1966)	growth rate	1.3893e-05	1.18805314773331e-05	299.956458539555	295.65	1.32949473579496e-05
Gymnodinium sp. isolate 581 (probably G. simplex)	Thomas (1966)	growth rate	8.70721988013e-06	7.60474502813165e-06	301.351454147492	295.65	8.91206478427553e-06
Gyrodinium uncatenum strain GYRO	Anderson (1985)	growth rate	1.24164121877e-05	4.90640180136386e-06	294.038264977617	295.65	5.242e-06
Heterocapsa rotundata	Throndsen (1976)	growth rate	2.48053800988e-05	1.57484561384121e-05	296.589708674792	295.65	1.82407094095256e-05
Heteromastix pyriformis	Throndsen (1976)	growth rate	2.50956617292e-05	1.32996461890986e-05	295.802326975364	295.65	1.85767175924148e-05
Karenia brevis strain APA	McKay et al. (2006)	growth rate	4.47774554552e-06	2.51254103490024e-06	296.187045842916	295.65	2.52244884954726e-06
Leonella granifera strain GeoB*39	Meier et al. (2004)	growth rate	1.14434207399e-05	4.18609399536393e-06	294.665860659415	295.65	4.51426447924712e-06
Leonella granifera	Meier et al. (2004)	growth rate	7.26594102607e-06	4.14080551905743e-06	296.192237217302	295.65	4.77830887534142e-06
Leptocylindrus danicus	Hulburt (1982)	growth rate	1.61460657424e-05	1.40367719409402e-05	299.356089226452	295.65	1.9899e-05
Mastigocladus laminosus strain NZ-86-m	Miyamoto et al. (1979)	growth rate	1.95415559329e-06	1.95414910666964e-06	324.570453047495	295.65	8.20215504687153e-06
Men. 5 (Diatom)	Hulburt (1982)	growth rate	4.41317156714e-05	1.63422591636644e-05	293.629025399297	295.65	1.74702639855812e-05
Microcystis aeruginosa strain NRC-1	Krï¿½ger & Eloff (1978)	growth rate	1.52711315599e-05	2.85063662185194e-06	292.36638199365	295.65	3.06858913396045e-06
Odontella mobiliensis	Hulburt (1982)	growth rate	1.64568489764e-05	1.29169300757672e-05	298.684119520492	295.65	1.61458027488982e-05
Olisthodiscus luteus clone OLMS	Tomas (1978)	growth rate	3.22717266281e-05	9.60102356110462e-06	290.530497478821	295.65	9.729e-06
Olisthodiscus luteus	Throndsen (1976)	growth rate	0.0002434945	4.83978148070571e-06	284.877219925717	295.65	9.81025559761881e-06
Peridinium sp. strain 1	Barker (1935)	growth rate	1.51417508258e-05	5.13838752730297e-06	294.173424526969	295.65	7.07368509769062e-06
Peridinium sp.	Barker (1935)	growth rate	1.56222919268e-05	5.10714862845534e-06	294.026923020159	295.65	7.059e-06
Pernambugia tuberosa strain GeoB*74	Meier et al. (2004)	growth rate	5.75920761225e-06	3.75972748577479e-06	297.44697074967	295.65	3.83841198212522e-06
Phaeodactylum tricornutum clone Pet Pd	Fawley (1984)	growth rate	1.85866297635e-05	1.71106194409107e-05	299.466313081789	295.65	1.71240918884049e-05
Phaeodactylum tricornutum	Ryther (1954)	growth rate	8.18237647156e-06	2.32372837525665e-06	292.635195305035	295.65	3.94492679185041e-06
Planktothrix agardhii	van Liere (1979)	growth rate	5.23561423182e-06	5.23513667424056e-06	308.565587871547	295.65	8.50361265835941e-06
Pleurochrysis carterae	Blankley & Lewin (1976)	growth rate	5.79138157024e-06	3.56406931070706e-06	296.622462170192	295.65	3.783e-06
Proboscia inermis	Boyd et al. (2013)	growth rate	9.79368556107e-06	1.85675697154662e-23	279.598496351356	295.65	3.776e-06
Prochlorococcus marinus eMED4	Johnson et al. (2006)	growth rate	6.44948142153e-06	5.34567577907453e-06	298.939986372422	295.65	5.47242185740893e-06
Prochlorococcus marinus strain MIT9215 (clade 1)	Johnson (2006)	growth rate	8.46348179545e-06	4.42603705089336e-06	295.930242916778	295.65	5.40190181425027e-06
Prochlorococcus marinus strain MIT9215 (clade 1)	Johnson et al. (2006)	growth rate	8.36093971401e-06	4.44025101187032e-06	296.036232293609	295.65	5.41729648799759e-06
Prochlorococcus marinus strain MIT9312 (clade 1)	Johnson (2006)	growth rate	5.68868154038e-06	5.64509616619524e-06	301.310638517968	295.65	7.21935642322832e-06
Prochlorococcus marinus strain MIT9312 (clade 1)	Johnson et al. (2006)	growth rate	5.70371986672e-06	5.66087913177134e-06	301.303313243284	295.65	7.23474728492459e-06
Prochlorococcus marinus strain MIT9313	Zinser et al. (2007)	growth rate	4.09230738501e-06	4.06219844361072e-06	302.713981456048	295.65	5.35914886655562e-06
Prochlorococcus marinus strain MIT9515 (clade 2)	Johnson (2006)	growth rate	6.494e-06	5.37196950570106e-06	298.932971205969	295.65	5.4986645773585e-06
Prochlorococcus marinus strain NATL2A	Zinser et al. (2007)	growth rate	6.50841232324e-06	5.38996602438589e-06	299.048071006916	295.65	5.53388886851116e-06
Prorocentrum minimum	Grzebyk & Berland (1996)	growth rate	8.024248452e-06	7.81604247009855e-06	301.405908762771	295.65	8.51161119420067e-06
Prorocentrum minimum	Grzebyk and Berland (1996)	growth rate	8.03346119824e-06	7.8184365596797e-06	301.384534598853	295.65	8.50519517531545e-06
Pseudo-nitzschia turgiduloides	Fiala & Oriol (1990)	growth rate	0.0035262346	3.08624024959098e-08	277.276548675566	295.65	5.72956293529455e-06
Pseudopedinella pyriformis	Throndsen (1976)	growth rate	4.21148920404e-05	3.49971824965377e-06	290.577212307755	295.65	1.40423090585318e-05
Pyrodinium bahamense var. compressum	Usup et al. (1994)	growth rate	2.05584230951e-06	2.05363953022228e-06	306.716800940362	295.65	3.08230903699702e-06
Pyrodinium bahamense var. compressum strain PbSA01	Usup et al. (1994)	growth rate	2.09173214678e-06	2.08968863613663e-06	306.774596596759	295.65	3.05794092590046e-06
Rhizosolenia fragilissimus	Ignatiades & Smayda (1970)	growth rate	0.0037363776	7.88634900571789e-06	282.662721817024	295.65	8.69851450220946e-06
Rhizosolenia setigera	Hulburt (1982)	growth rate	1.67784613584e-05	1.35974115233746e-07	288.29785850264	295.65	6.495e-06
Rhizosolenia setigera	Hulburt (1982)	growth rate	0.0002679614	1.38105811315381e-05	289.619096064555	295.65	1.41999006262071e-05
Scrippsiella trochoidea strain ScrpMxB	Binder & Anderson (1987)	growth rate	6.10330344667e-06	3.10145812529317e-06	295.66919999589	295.65	5.59451022200127e-06
Skeletonema marinoionohrnii complex	Kaeriyama et al. (2011)	growth rate	2.99338948348e-05	1.80498285894055e-05	299.175774040476	295.65	1.85680517687629e-05
Skeletonema tropicum clone S. trop.	Hulburt & Guillard (1968)	growth rate	0.0145152579	1.86664628062547e-05	288.918452326197	295.65	1.86803529660345e-05
Skeletonema tropicum clone fall	Hulburt (1982)	growth rate	0.303783433	1.66035850758058e-05	287.243287019485	295.65	1.66060788524278e-05
Synechococcus sp. strain UV-005, PCC 6311	Krï¿½ger & Eloff (1978)	growth rate	0.0001694551	3.51282589689812e-06	289.212220951143	295.65	3.58629509581014e-06
Thalassiosira pseudonana strain CCMP1011, STX97	Boyd et al. (2013)	growth rate	1.3878e-05	1.32573742319911e-05	299.544600951068	295.65	1.37492702210445e-05
Thalassiosira pseudonana strain CCMP1012, SWAN1	Boyd et al. (2013)	growth rate	2.0756209602e-05	1.7008027050845e-05	298.169421100788	295.65	1.71760537749938e-05
Thalassiosira pseudonana strain CCMP1013, W	Boyd et al. (2013)	growth rate	1.45712539917e-05	1.45406917905539e-05	302.657067788323	295.65	2.23890650313376e-05
Thalassiosira pseudonana strain CCMP1014, FCRG66	Boyd et al. (2013)	growth rate	1.39785344655e-05	1.39759933942227e-05	303.810143219207	295.65	1.90359445260361e-05
Thalassiosira pseudonana strain CCMP1015, ARC5	Boyd et al. (2013)	growth rate	1.42482571204e-05	1.42288113843915e-05	304.114508537826	295.65	1.83244214158838e-05
Thalassiosira pseudonana	Thompson et al. (1992)	growth rate	3.08718444833e-05	2.02058439158469e-05	298.463113097004	295.65	2.09368994791142e-05
Thalassiosira rotula strain CCAP1085_21	Boyd et al. (2013)	growth rate	6.87649372637e-05	7.93210852640818e-06	286.733428501875	295.65	8.97839049004421e-06
Thalassiosira rotula strain CCMP3096	Boyd et al. (2013)	growth rate	6.12251635101e-05	7.41849499935588e-06	285.456439995627	295.65	8.1041254289674e-06
Thalassiosira rotula strain CCMP3264	Boyd et al. (2013)	growth rate	0.0003968713	8.17549811167652e-06	282.991301693005	295.65	9.27428098232369e-06
Thalassiosira rotula strain JpnTR18	Boyd et al. (2013)	growth rate	9.5103e-05	6.69096199729508e-06	282.412377732262	295.65	7.44632596179888e-06
Thalassiosira rotula	Baars (1981)	growth rate	0.0152461569	1.06056773735507e-05	279.745095893181	295.65	1.75082993645476e-05
Trichodesmium erythraeum strain 21_75	Boyd et al. (2013)	growth rate	2.78031888333e-06	2.02188737960198e-06	297.652509641816	295.65	3.10353696801146e-06
Trichodesmium erythraeum strain KO4_20	Boyd et al. (2013)	growth rate	2.729e-06	2.29981370402023e-06	299.074651849728	295.65	3.62462610939172e-06
Trichodesmium radians strain H94	Chappell & Webb (2010)	growth rate	1.19643153579e-06	1.11752687376258e-06	298.661417034763	295.65	4.2498520606014e-06
Akashiwo sanguinea strain BWA	Boyd et al. (2013)	growth rate	6.09034520994e-06	4.1044750013812e-06	300.30827566904	298.15	4.219e-06
Akashiwo sanguinea strain GBB	Boyd et al. (2013)	growth rate	6.186318795e-06	4.9618055317802e-06	302.229177079859	298.15	4.96365278567568e-06
Akashiwo sanguinea strain RMB	Boyd et al. (2013)	growth rate	5.43129713894e-06	4.27046728969962e-06	300.976806237046	298.15	4.28678858414516e-06
Akashiwo sanguinea strain YRB	Boyd et al. (2013)	growth rate	4.55336052703e-06	4.52250713982521e-06	304.168563469238	298.15	4.71375317608083e-06
Alexandrium minutum	Cannon (1993)	growth rate	0.003657724	3.35093415804951e-06	286.476433407062	298.15	3.48128133681195e-06
Alexandrium ostenfeldii clone LF-37	Jensen & Moestrup (1997)	growth rate	1.1458e-05	1.3005948479717e-06	293.992188613575	298.15	2.54571131562151e-06
Alexandrium ostenfeldii clone LF-37	Jensen and Moestrup (1997)	growth rate	1.12474235022e-05	1.35612826672268e-06	293.958949999656	298.15	2.50084352436405e-06
Alexandrium tamarense clone GTMP	Watras et al. (1982)	growth rate	0.0265843217	2.9218236256083e-06	283.307328916452	298.15	4.048e-06
Amphidinium klebsii	Morton et al. (1992)	growth rate	3.68633069018e-06	3.27582211259016e-06	301.654306852764	298.15	4.38112824743019e-06
Amphiprora sp.	Hulburt (1982)	growth rate	1.09344286937e-05	9.05792296720521e-06	302.007901731884	298.15	1.01726832963069e-05
Apedinella radians	Throndsen (1976)	growth rate	0.0055117878	1.28376112776116e-05	284.64564993811	298.15	1.386e-05
Biceratium furca	Baek et al. (2008)	growth rate	0.00432313	5.18659562686393e-06	288.693233780448	298.15	5.57268259680942e-06
Ceratium furca	Baek et al. (2008)	growth rate	0.0004892034	5.50228823388948e-06	289.769150966163	298.15	6.04766118253552e-06
Chaetoceros didymus	Hulburt (1982)	growth rate	696.367801405	1.40768466995106e-05	286.520468994045	298.15	1.57321947019531e-05
Chaetoceros lorenzianus clone Bushehr	Hulburt (1982)	growth rate	2.00832663256e-05	1.83646541703189e-05	302.421280821576	298.15	1.94180572528759e-05
Chaetoceros sp.	Thomas (1966)	growth rate	0.0005410258	3.95604954357177e-05	292.353885954448	298.15	4.08934921211861e-05
Chattonella marina	Kahn (1998)	growth rate	1.21825310591e-05	4.83322491803116e-06	296.692872875611	298.15	4.96509194203629e-06
Chlamydomonas alpina	Seaburg et al. (1981)	growth rate	0.0001699501	5.12472138568571e-08	287.640464444738	298.15	1.0833e-05
Chlamydomonas reinhardtii	McCombie (1960)	growth rate	1.29658987253e-05	7.91015473206047e-07	289.979517243423	298.15	8.20100319851701e-07
Chlamydomonas subcaudata	Seaburg et al. (1981)	growth rate	3.78274992295e-05	9.22708424714285e-09	288.322572778805	298.15	1.12556324209039e-05
Chlorella MFD1	James et al. (1989)	growth rate	3.78886810158e-06	2.10477454443399e-06	299.358218458388	298.15	2.13586291926803e-06
Chlorella sorokiniana strain CCAP 211/8K, 7-11-05	Sorokin (1960)	growth rate	1.93134266593e-05	1.85494730248749e-05	305.611553723626	298.15	8.01894294611745e-05
Chlorella sp. strain MFD-1	James et al. (1989)	growth rate	2.56390909954e-06	1.48381997908951e-06	299.855705026629	298.15	1.50626088597123e-06
Chrysochromulina polylepis strain B3	Edvardsen (1992)	growth rate	3.5717e-05	1.28138125437053e-06	291.556259361281	298.15	1.00283288531845e-05
Chrysochromulina polylepis strain B4	Edvardsen (1992)	growth rate	2.37478576286e-05	1.07029684873208e-06	292.641339159628	298.15	8.60334734852404e-06
Chrysochromulina polylepis strain K	Edvardsen (1992)	growth rate	4.30451157247e-05	6.68961625627952e-06	292.357669586682	298.15	9.9221581239276e-06
Cochlodinium polykrikoides strain KG8-ND14	Yamatogi (2005)	growth rate	8.04684918931e-06	6.01782902267096e-06	301.62434038407	298.15	6.42953667363539e-06
Conticribra guillardii clone 7-15	Guillard & Ryther (1962)	growth rate	0.0005554992	1.11856747183615e-05	285.181510479934	298.15	1.83323113974483e-05
Conticribra weissflogii strain CCMP1053, SA	Boyd et al. (2013)	growth rate	5.29838312282e-05	2.89351938354981e-06	292.241441995725	298.15	8.41706906772784e-06
Cosmarium beatum SVCK 533	Stamenkovi? et al. (2013)	growth rate	3.31581340261e-05	3.5211167282726e-06	293.244360148658	298.15	4.08553508417365e-06
Cosmarium beatum	Stamenkovi? and Hanelt (2013)	growth rate	3.31581340261e-05	3.5211167282726e-06	293.244360148658	298.15	4.08553508417365e-06
Cosmarium crenatum var. boldtianum strain SVCK 561, ASW Wien #07 141	Stamenkovi? et al. (2013)	growth rate	6.25725989956e-06	2.73426562919006e-06	297.58455356944	298.15	3.55149587724187e-06
Cosmarium crenatum	Stamenkovi? and Hanelt (2013)	growth rate	6.25725989956e-06	2.73426562919006e-06	297.58455356944	298.15	3.55149587724187e-06
Cosmarium meneghinii strain SVCK 59, 1927/Praha Ac. A 231	Stamenkovi? et al. (2013)	growth rate	2.85828551935e-05	4.91349311970712e-06	295.208775955969	298.15	7.83780747360153e-06
Cosmarium meneghinii	Stamenkovi? and Hanelt (2013)	growth rate	2.85828551935e-05	4.91349311970712e-06	295.208775955969	298.15	7.83780747360153e-06
Cosmarium punctulatum #571	Stamenkovi? and Hanelt (2013)	growth rate	1.0341e-05	2.32120622090851e-06	295.636400841472	298.15	3.56617895297536e-06
Cosmarium punctulatum var. subpunctulatum strain SVCK 571, ASW Wien #07 136	Stamenkovi? et al. (2013)	growth rate	1.0341e-05	2.32120622090851e-06	295.636400841472	298.15	3.56617895297536e-06
Crocosphaera watsonii strain 3A	Boyd et al. (2013)	growth rate	2.91247706796e-06	2.90937805084231e-06	305.643157836505	298.15	4.48518098090428e-06
Crocosphaera watsonii strain WH005	Boyd et al. (2013)	growth rate	1.05025390706e-05	4.93983440440457e-06	297.906171705832	298.15	6.06670206925385e-06
Crocosphaera watsonii strain WH84	Boyd et al. (2013)	growth rate	1.58872897583e-05	4.87542855852463e-06	297.051944493925	298.15	5.90036647861766e-06
Cryptomonas marssonii	Butterwick et al. (2005)	growth rate	0.000621303	4.75345053009629e-06	281.234847077195	298.15	6.47384614676756e-06
Cryptomonas marssonii	Butterwick et al. (2005)	growth rate	0.0007597981	4.75468831534184e-06	281.03651763857	298.15	6.48187188868116e-06
Cryptomonas sp. strain F	Throndsen (1976)	growth rate	1.47309345328e-05	8.7045051694034e-06	298.864374763709	298.15	1.1287e-05
Cylindrotheca closterium	Maddux & Jones (1964)	growth rate	6.00024087782e-05	5.74624399561125e-06	291.27159259706	298.15	6.86779846436286e-06
Dactyliosolen fragilissimus	Ignatiades & Smayda (1970)	growth rate	0.0109205033	7.50189586037543e-06	282.662722805864	298.15	8.6985172187221e-06
Desmodesmus quadricaudatus strain A 119, Greifswald/15	Komï¿½rek & Ruzicka (1969)	growth rate	8.91777425368e-05	1.32937936262646e-05	292.122057614443	298.15	1.42223723003612e-05
Diacronema lutheri strain NEPCC 5	Thompson (1992)	growth rate	2.71776360727e-05	2.2895466326304e-05	298.587750624482	298.15	2.5171e-05
Dinobryon divergens	Butterwick et al. (2005)	growth rate	2.73443872405e-05	2.97309696933071e-06	290.139440781549	298.15	5.43293931026242e-06
Dinobryon divergens	Butterwick et al. (2005)	growth rate	2.77108001167e-05	2.93623060844501e-06	290.077788680734	298.15	5.4364316814032e-06
Ditylum brightwellii	Paasche (1968)	growth rate	2.54899065354e-05	2.07353002555117e-05	301.957182685825	298.15	2.07353012717413e-05
Dunaliella sp.	Van Auken & McNulty (1973)	growth rate	5.00277626963e-06	4.99975349562053e-06	308.085482175957	298.15	8.58417870429362e-06
Emiliania huxleyi strain B92/21	Conte et al. (1998)	growth rate	1.87403856844e-05	8.08844622879572e-06	297.445786455623	298.15	1.09885280459539e-05
Emiliania huxleyi strain G1779Ga	Conte et al. (1998)	growth rate	4.3767e-05	1.15067610108991e-05	294.303741831871	298.15	1.31791530445524e-05
Emiliania huxleyi strain S. Africa	Conte et al. (1998)	growth rate	1.89191958388e-05	9.84868017221176e-06	298.373699347169	298.15	1.02504811786599e-05
Emiliania huxleyi strain Van556	Conte et al. (1998)	growth rate	1.04777506677e-05	2.48135373582135e-06	297.517674672655	298.15	9.64748077704324e-06
Eutreptiella gymnastica	Throndsen (1976)	growth rate	3.7376e-05	7.90152721923692e-06	294.915413134167	298.15	1.81208156408489e-05
Fibrocapsa japonica strain CAWR-19	de Boer et al. (2005)	growth rate	4.75656796011e-06	3.83155851257978e-06	301.386627206634	298.15	3.84319471508037e-06
Fibrocapsa japonica strain CCRuG-C13	de Boer et al. (2005)	growth rate	2.4781e-05	4.22028349047674e-06	291.998436078522	298.15	4.49462144606259e-06
Fibrocapsa japonica strain CS-332	de Boer et al. (2005)	growth rate	1.49731658038e-05	3.75793473440704e-06	295.569683305521	298.15	4.41723358635723e-06
Gephyrocapsa oceanica strain AB1, CAWPOT	Conte et al. (1998)	growth rate	1.82515607e-05	1.07165502560826e-05	299.217079555419	298.15	1.10067568242531e-05
Gephyrocapsa oceanica var. typica strain A4725	Bollmann et al. (2010)	growth rate	2.23486803804e-05	1.4365616412146e-05	300.026315743091	298.15	1.4601897601345e-05
Gephyrocapsa oceanica var. typica strain A4727	Bollmann et al. (2010)	growth rate	2.49999067858e-05	1.43043436135832e-05	299.121101246931	298.15	1.44849043662903e-05
Gymnodinium isolate 582 (probably G. simplex)	Thomas (1966)	growth rate	1.96422996034e-05	1.32915338086846e-05	299.956458539656	298.15	1.32949473583175e-05
Gymnodinium sp. isolate 581 (probably G. simplex)	Thomas (1966)	growth rate	1.17081655622e-05	8.72968110416948e-06	301.351454731853	298.15	8.91206538292913e-06
Gyrodinium uncatenum strain GYRO	Anderson (1985)	growth rate	2.05798782262e-05	5.22922096739223e-06	294.038268249332	298.15	5.242e-06
Heterocapsa rotundata	Throndsen (1976)	growth rate	2.97802055534e-05	8.54172404673345e-06	296.589708699489	298.15	1.82407094091326e-05
Heteromastix pyriformis	Throndsen (1976)	growth rate	3.01644157167e-05	4.15707403657882e-06	295.802326975364	298.15	1.85767175924141e-05
Karenia brevis strain APA	McKay et al. (2006)	growth rate	7.75207350564e-06	2.25587079486897e-06	296.187044200332	298.15	2.52244846999627e-06
Leonella granifera strain GeoB*39	Meier et al. (2004)	growth rate	3.51298348939e-05	4.44616091413074e-06	294.665857529693	298.15	4.51426391721797e-06
Leonella granifera	Meier et al. (2004)	growth rate	1.78039199657e-05	4.76190180188234e-06	296.192236620073	298.15	4.77830878906502e-06
Leptocylindrus danicus	Hulburt (1982)	growth rate	2.97213767676e-05	1.92687608953732e-05	299.356089226452	298.15	1.9899e-05
Mastigocladus laminosus strain NZ-86-m	Miyamoto et al. (1979)	growth rate	2.32609510426e-06	2.32606979526248e-06	324.570453088663	298.15	8.2021548807361e-06
Men. 5 (Diatom)	Hulburt (1982)	growth rate	7.3952e-05	1.74134858987618e-05	293.629049865658	298.15	1.74702692660004e-05
Microcystis aeruginosa strain NRC-1	Krï¿½ger & Eloff (1978)	growth rate	4.31046099193e-05	3.06267746387548e-06	292.366378980873	298.15	3.06858875954442e-06
Neoceratium fusus	Baek et al. (2008)	growth rate	0.0359854051	4.12696143601268e-06	288.288552870299	298.15	4.12865787733867e-06
Odontella mobiliensis	Hulburt (1982)	growth rate	2.86878347293e-05	1.5957623111579e-05	298.6841192902	298.15	1.61458027039156e-05
Olisthodiscus luteus clone OLMS	Tomas (1978)	growth rate	4.43014882605e-05	9.72815943882768e-06	290.530480765092	298.15	9.729e-06
Olisthodiscus luteus	Throndsen (1976)	growth rate	0.0004305214	3.64728490378897e-06	284.877219272061	298.15	9.81025400977586e-06
Peridinium sp. strain 1	Barker (1935)	growth rate	2.04208791281e-05	2.94917961405126e-06	294.17342610159	298.15	7.07368511275289e-06
Peridinium sp.	Barker (1935)	growth rate	2.1228463276e-05	2.96213875149308e-06	294.026923237678	298.15	7.059e-06
Pernambugia tuberosa strain GeoB*74	Meier et al. (2004)	growth rate	8.51256857186e-06	3.73754085522696e-06	297.446978365571	298.15	3.83841228432947e-06
Phaeodactylum tricornutum clone Pet Pd	Fawley (1984)	growth rate	2.15014975907e-05	1.50093679126998e-05	299.466312220223	298.15	1.71240916547209e-05
Phaeodactylum tricornutum	Ryther (1954)	growth rate	9.65322154726e-06	1.51980466193267e-06	292.635195150927	298.15	3.94492680418887e-06
Planktothrix agardhii	van Liere (1979)	growth rate	6.10966450742e-06	6.10607397000186e-06	308.565587871547	298.15	8.50361265835414e-06
Pleurochrysis carterae	Blankley & Lewin (1976)	growth rate	7.57251088229e-06	2.4588031434276e-06	296.622462112983	298.15	3.783e-06
Proboscia inermis	Boyd et al. (2013)	growth rate	1.1091e-05	5.42393862042654e-26	279.598496471961	298.15	3.776e-06
Prochlorococcus marinus eMED4	Johnson et al. (2006)	growth rate	8.78758336074e-06	5.20941483210966e-06	298.939986417492	298.15	5.47242187815183e-06
Prochlorococcus marinus strain MIT9215 (clade 1)	Johnson (2006)	growth rate	1.60242731114e-05	5.24001786971159e-06	295.930244164984	298.15	5.40190187071582e-06
Prochlorococcus marinus strain MIT9215 (clade 1)	Johnson et al. (2006)	growth rate	1.55648049119e-05	5.25003089523428e-06	296.036230744366	298.15	5.41729641575764e-06
Prochlorococcus marinus strain MIT9312 (clade 1)	Johnson (2006)	growth rate	7.50135346692e-06	7.02584286006711e-06	301.310638644371	298.15	7.21935647909152e-06
Prochlorococcus marinus strain MIT9312 (clade 1)	Johnson et al. (2006)	growth rate	7.51539885956e-06	7.04269464268476e-06	301.303313218573	298.15	7.2347472863363e-06
Prochlorococcus marinus strain MIT9313	Zinser et al. (2007)	growth rate	5.20158342903e-06	4.98625745021698e-06	302.713981426071	298.15	5.35914878684975e-06
Prochlorococcus marinus strain MIT9515 (clade 2)	Johnson (2006)	growth rate	8.85177929098e-06	5.23624273024973e-06	298.932971204868	298.15	5.49866456742001e-06
Prochlorococcus marinus strain NATL2A	Zinser et al. (2007)	growth rate	8.83829757325e-06	5.31711436265134e-06	299.048069039907	298.15	5.5338883851605e-06
Prorocentrum minimum	Grzebyk & Berland (1996)	growth rate	9.62541386588e-06	8.51152602139953e-06	301.405908749128	298.15	8.51161125303973e-06
Prorocentrum minimum	Grzebyk and Berland (1996)	growth rate	9.64456605807e-06	8.5048849874459e-06	301.384534473382	298.15	8.50519520612304e-06
Pseudo-nitzschia turgiduloides	Fiala & Oriol (1990)	growth rate	0.007280662	1.4597162818494e-08	277.276547545527	298.15	5.72956291969018e-06
Pseudopedinella pyriformis	Throndsen (1976)	growth rate	5.50269483146e-05	1.53028523058007e-06	290.577212307755	298.15	1.40423090581327e-05
Pyrodinium bahamense var. compressum	Usup et al. (1994)	growth rate	2.448e-06	2.43520377992709e-06	306.716800932386	298.15	3.08230903582833e-06
Pyrodinium bahamense var. compressum strain PbSA01	Usup et al. (1994)	growth rate	2.4650865064e-06	2.45317541313206e-06	306.774596662301	298.15	3.05794092776133e-06
Rhizosolenia fragilissimus	Ignatiades & Smayda (1970)	growth rate	0.0109205033	7.50189586037543e-06	282.662722805864	298.15	8.6985172187221e-06
Rhizosolenia setigera	Hulburt (1982)	growth rate	2.03076743629e-05	3.40966829580024e-08	288.297856358808	298.15	6.495e-06
Rhizosolenia setigera	Hulburt (1982)	growth rate	0.0007598798	1.25687371457244e-05	289.619095322171	298.15	1.41999002584443e-05
Scrippsiella trochoidea strain ScrpMxB	Binder & Anderson (1987)	growth rate	6.56690123193e-06	9.8691428761486e-08	295.669200255174	298.15	5.59451049867768e-06
Skeletonema marinoionohrnii complex	Kaeriyama et al. (2011)	growth rate	3.48857413541e-05	1.84931707225801e-05	299.175772455491	298.15	1.85680517393278e-05
Skeletonema tropicum clone S. trop.	Hulburt & Guillard (1968)	growth rate	0.1553045272	1.86822043213354e-05	288.920318785564	298.15	1.86828612133229e-05
Skeletonema tropicum clone fall	Hulburt (1982)	growth rate	4.9420642978	1.65929802718694e-05	287.242083074	298.15	1.66031363556759e-05
Synechococcus sp. strain UV-005, PCC 6311	Krï¿½ger & Eloff (1978)	growth rate	0.0007178608	3.57092745024166e-06	289.219617154023	298.15	3.58673833692329e-06
Thalassiosira pseudonana strain CCMP1011, STX97	Boyd et al. (2013)	growth rate	1.72593391773e-05	1.29071934430949e-05	299.544600941806	298.15	1.37492701779137e-05
Thalassiosira pseudonana strain CCMP1012, SWAN1	Boyd et al. (2013)	growth rate	2.96002352705e-05	1.48856673408771e-05	298.169421156527	298.15	1.71760537202133e-05
Thalassiosira pseudonana strain CCMP1013, W	Boyd et al. (2013)	growth rate	1.96261484214e-05	1.92488419281569e-05	302.657068257659	298.15	2.23890667046381e-05
Thalassiosira pseudonana strain CCMP1014, FCRG66	Boyd et al. (2013)	growth rate	1.65689217221e-05	1.65247190971668e-05	303.810143206924	298.15	1.90359445349751e-05
Thalassiosira pseudonana strain CCMP1015, ARC5	Boyd et al. (2013)	growth rate	1.6724872815e-05	1.65598204291654e-05	304.114509093005	298.15	1.83244220836771e-05
Thalassiosira pseudonana	Thompson et al. (1992)	growth rate	4.0443609029e-05	2.0934708229232e-05	298.463198924327	298.15	2.09368988800991e-05
Thalassiosira rotula strain CCAP1085_21	Boyd et al. (2013)	growth rate	0.0001009612	7.06835869573733e-06	286.733428501875	298.15	8.97839048998609e-06
Thalassiosira rotula strain CCMP3096	Boyd et al. (2013)	growth rate	8.56888879197e-05	6.82782478069639e-06	285.456439995627	298.15	8.10412542994932e-06
Thalassiosira rotula strain CCMP3264	Boyd et al. (2013)	growth rate	0.0007478829	7.55017613438636e-06	282.991302021051	298.15	9.27428100416508e-06
Thalassiosira rotula strain JpnTR18	Boyd et al. (2013)	growth rate	0.000136674	6.22147234464254e-06	282.412377732262	298.15	7.44632596179881e-06
Thalassiosira rotula	Baars (1981)	growth rate	0.039206636	9.33880363651321e-06	279.745096378549	298.15	1.75083035332221e-05
Trichodesmium erythraeum strain 21_75	Boyd et al. (2013)	growth rate	6.6894155459e-06	2.94269572905264e-06	297.652510143269	298.15	3.10353700877876e-06
Trichodesmium erythraeum strain KO4_20	Boyd et al. (2013)	growth rate	5.53460269586e-06	3.37891439228839e-06	299.074651821436	298.15	3.62462610855094e-06
Trichodesmium radians strain H94	Chappell & Webb (2010)	growth rate	5.67875206261e-06	3.46276911959515e-06	298.661417605659	298.15	4.24985355282677e-06
Akashiwo sanguinea strain BWA	Boyd et al. (2013)	growth rate	7.32562837067e-06	3.45426596358752e-06	300.30827566904	300.65	4.219e-06
Akashiwo sanguinea strain GBB	Boyd et al. (2013)	growth rate	7.26934734959e-06	4.5880931186464e-06	302.229176618401	300.65	4.96365281928895e-06
Akashiwo sanguinea strain RMB	Boyd et al. (2013)	growth rate	6.67416066821e-06	3.58579711641207e-06	300.976805874284	300.65	4.28678865812754e-06
Akashiwo sanguinea strain YRB	Boyd et al. (2013)	growth rate	4.96894816386e-06	4.70772435483408e-06	304.168563312239	300.65	4.71375323280855e-06
Alexandrium minutum	Cannon (1993)	growth rate	0.0148462415	3.26589827337711e-06	286.476432805336	300.65	3.48128005480177e-06
Alexandrium ostenfeldii clone LF-37	Jensen & Moestrup (1997)	growth rate	1.86635065032e-05	6.87408995645044e-07	293.99218918807	300.65	2.54571133158119e-06
Alexandrium ostenfeldii clone LF-37	Jensen and Moestrup (1997)	growth rate	1.8196260818e-05	7.50638973205064e-07	293.958950164948	300.65	2.50084353206319e-06
Amphidinium klebsii	Morton et al. (1992)	growth rate	6.76939739284e-06	4.35563166328949e-06	301.654306902892	300.65	4.38112824638815e-06
Amphiprora sp.	Hulburt (1982)	growth rate	1.60425661719e-05	1.01712517600276e-05	302.007898407032	300.65	1.01726822225742e-05
Apedinella radians	Throndsen (1976)	growth rate	0.0152807323	1.23231351002367e-05	284.64564993811	300.65	1.386e-05
Biceratium furca	Baek et al. (2008)	growth rate	0.022598009	4.92323727378795e-06	288.693238485055	300.65	5.5726869302454e-06
Ceratium furca	Baek et al. (2008)	growth rate	0.0015945543	4.99259102554835e-06	289.769148366719	300.65	6.04766043745492e-06
Chaetoceros didymus	Hulburt (1982)	growth rate	25386.3627123	1.3612750002424e-05	286.520468417611	300.65	1.57321935178406e-05
Chaetoceros gracilis	Thompson et al. (1992)	growth rate	0.0001909883	1.45989167097122e-05	291.622773970937	300.65	1.8613226958097e-05
Chaetoceros lorenzianus clone Bushehr	Hulburt (1982)	growth rate	2.62734641137e-05	1.90734156478705e-05	302.421280746719	300.65	1.94180574279571e-05
Chaetoceros sp.	Thomas (1966)	growth rate	0.001541756	4.08103662981301e-05	292.353881260354	300.65	4.08934847823521e-05
Chattonella marina	Kahn (1998)	growth rate	1.72286260583e-05	4.21080261120077e-06	296.692872875611	300.65	4.96509194203608e-06
Chlamydomonas alpina	Seaburg et al. (1981)	growth rate	0.0002785959	1.32804615645479e-08	287.640464617181	300.65	1.0833e-05
Chlamydomonas reinhardtii	McCombie (1960)	growth rate	2.60577250792e-05	7.34269107693457e-07	289.979525898411	300.65	8.20100543640523e-07
Chlamydomonas subcaudata	Seaburg et al. (1981)	growth rate	4.68364746512e-05	1.50174492474371e-09	288.322572736905	300.65	1.12556325182458e-05
Chlorella MFD1	James et al. (1989)	growth rate	4.47056454843e-06	1.97228176698511e-06	299.358261759134	300.65	2.13586261783488e-06
Chlorella sorokiniana strain CCAP 211/8K, 7-11-05	Sorokin (1960)	growth rate	3.91061551048e-05	3.48524924630903e-05	305.611552648793	300.65	8.01894284114115e-05
Chlorella sp. strain MFD-1	James et al. (1989)	growth rate	2.9977239901e-06	1.38914648599045e-06	299.855678649289	300.65	1.50626100065463e-06
Chrysochromulina polylepis strain B3	Edvardsen (1992)	growth rate	4.68509313161e-05	5.14116587199603e-07	291.556259361281	300.65	1.00283288531808e-05
Chrysochromulina polylepis strain B4	Edvardsen (1992)	growth rate	3.02231903195e-05	3.65738278557607e-07	292.641339159628	300.65	8.60334734877908e-06
Chrysochromulina polylepis strain K	Edvardsen (1992)	growth rate	5.96576726701e-05	4.9471058800995e-06	292.357669586682	300.65	9.92215811108514e-06
Cochlodinium polykrikoides strain KG8-ND14	Yamatogi (2005)	growth rate	1.11806745246e-05	6.42907822577409e-06	301.624340252877	300.65	6.42953665976287e-06
Conticribra guillardii clone 7-15	Guillard & Ryther (1962)	growth rate	0.0009312012	9.31062737024188e-06	285.181509811561	300.65	1.83323112623795e-05
Conticribra weissflogii strain CCMP1053, SA	Boyd et al. (2013)	growth rate	8.55022869261e-05	1.50194040611365e-06	292.241441995725	300.65	8.41706905902781e-06
Cosmarium beatum SVCK 533	Stamenkovi? et al. (2013)	growth rate	6.91173607495e-05	2.73548574332114e-06	293.244361886523	300.65	4.08553601084119e-06
Cosmarium beatum	Stamenkovi? and Hanelt (2013)	growth rate	6.91173607495e-05	2.73548574332114e-06	293.244361886523	300.65	4.08553601084119e-06
Cosmarium crenatum var. boldtianum strain SVCK 561, ASW Wien #07 141	Stamenkovi? et al. (2013)	growth rate	7.89394075881e-06	1.60893969082599e-06	297.584553529019	300.65	3.55149588456488e-06
Cosmarium crenatum	Stamenkovi? and Hanelt (2013)	growth rate	7.89394075881e-06	1.60893969082599e-06	297.584553529019	300.65	3.55149588456488e-06
Cosmarium meneghinii strain SVCK 59, 1927/Praha Ac. A 231	Stamenkovi? et al. (2013)	growth rate	4.80555271956e-05	2.54369385313403e-06	295.208778186782	300.65	7.83780797746019e-06
Cosmarium meneghinii	Stamenkovi? and Hanelt (2013)	growth rate	4.80555271956e-05	2.54369385313403e-06	295.208778186782	300.65	7.83780797746019e-06
Cosmarium punctulatum #571	Stamenkovi? and Hanelt (2013)	growth rate	1.56376876256e-05	1.23951734616177e-06	295.63640430697	300.65	3.56617884369572e-06
Cosmarium punctulatum var. subpunctulatum strain SVCK 571, ASW Wien #07 136	Stamenkovi? et al. (2013)	growth rate	1.56376876256e-05	1.23951734616177e-06	295.63640430697	300.65	3.56617884369572e-06
Crocosphaera watsonii strain 3A	Boyd et al. (2013)	growth rate	3.80646332729e-06	3.76558520984221e-06	305.643157837637	300.65	4.48518097877956e-06
Crocosphaera watsonii strain WH005	Boyd et al. (2013)	growth rate	2.872e-05	6.02977187265944e-06	297.906171705832	300.65	6.06670206925322e-06
Crocosphaera watsonii strain WH84	Boyd et al. (2013)	growth rate	8.91724157621e-05	5.89770177770339e-06	297.051945043752	300.65	5.90036874389139e-06
Cryptomonas marssonii	Butterwick et al. (2005)	growth rate	0.0011019297	4.31885848019679e-06	281.23484986148	300.65	6.47384637542231e-06
Cryptomonas marssonii	Butterwick et al. (2005)	growth rate	0.0013779753	4.33002567705109e-06	281.03651684874	300.65	6.48187185323847e-06
Cryptomonas sp. strain F	Throndsen (1976)	growth rate	1.64941893983e-05	4.72906379191737e-06	298.864374763709	300.65	1.1287e-05
Cylindrotheca closterium	Maddux & Jones (1964)	growth rate	0.0001034903	4.74371375156275e-06	291.27159259706	300.65	6.86779846664085e-06
Dactyliosolen fragilissimus	Ignatiades & Smayda (1970)	growth rate	0.0313536136	7.13538586242286e-06	282.662722740135	300.65	8.69851486899975e-06
Desmodesmus quadricaudatus strain A 119, Greifswald/15	Komï¿½rek & Ruzicka (1969)	growth rate	0.0001753114	1.40056174407503e-05	292.122065282228	300.65	1.42223740453732e-05
Diacronema lutheri strain NEPCC 5	Thompson (1992)	growth rate	3.47558868932e-05	4.19181051184634e-09	298.538974277991	300.65	2.53171779843961e-05
Dinobryon divergens	Butterwick et al. (2005)	growth rate	3.61798204678e-05	2.19977275796942e-06	290.139441919797	300.65	5.43293932144993e-06
Dinobryon divergens	Butterwick et al. (2005)	growth rate	3.6723e-05	2.16550985143879e-06	290.077789637611	300.65	5.43643211728079e-06
Ditylum brightwellii	Paasche (1968)	growth rate	3.05563270388e-05	1.90304778640172e-05	301.95718202958	300.65	2.0735300369229e-05
Dunaliella sp.	Van Auken & McNulty (1973)	growth rate	6.33105671153e-06	6.30529042032774e-06	308.085482177188	300.65	8.58417870275201e-06
Emiliania huxleyi strain B92/21	Conte et al. (1998)	growth rate	2.24609160523e-05	5.0322883182547e-06	297.445786034024	300.65	1.09885278835113e-05
Emiliania huxleyi strain G1779Ga	Conte et al. (1998)	growth rate	6.04373086257e-05	9.4399390743195e-06	294.303738682758	300.65	1.31791515171517e-05
Emiliania huxleyi strain S. Africa	Conte et al. (1998)	growth rate	2.57967498819e-05	7.82988411263306e-06	298.373699753279	300.65	1.02504812549142e-05
Emiliania huxleyi strain Van556	Conte et al. (1998)	growth rate	1.11016017877e-05	3.52743131972349e-08	297.51767467693	300.65	9.64748076167085e-06
Eutreptiella gymnastica	Throndsen (1976)	growth rate	4.49801394199e-05	4.04482633637967e-06	294.915412790307	300.65	1.81208158565293e-05
Fibrocapsa japonica strain CAWR-19	de Boer et al. (2005)	growth rate	5.69915065722e-06	3.30272262113242e-06	301.386627112437	300.65	3.84319473620391e-06
Fibrocapsa japonica strain CCRuG-C13	de Boer et al. (2005)	growth rate	3.80079380141e-05	3.76243268805957e-06	291.998434486164	300.65	4.49462138985517e-06
Fibrocapsa japonica strain CS-332	de Boer et al. (2005)	growth rate	2.47628737126e-05	2.61875836898041e-06	295.569683270821	300.65	4.41723358274339e-06
Gephyrocapsa oceanica strain AB1, CAWPOT	Conte et al. (1998)	growth rate	2.33721743766e-05	8.99454273003227e-06	299.217078495092	300.65	1.10067566000658e-05
Gephyrocapsa oceanica var. typica strain A4725	Bollmann et al. (2010)	growth rate	3.16407806969e-05	1.4293210552368e-05	300.026307073824	300.65	1.46018964565454e-05
Gephyrocapsa oceanica var. typica strain A4727	Bollmann et al. (2010)	growth rate	3.64571263753e-05	1.41609780393062e-05	299.12110521655	300.65	1.44849047000006e-05
Gymnodinium isolate 582 (probably G. simplex)	Thomas (1966)	growth rate	2.76114014459e-05	1.18773808573447e-05	299.956458539656	300.65	1.32949473583478e-05
Gymnodinium sp. isolate 581 (probably G. simplex)	Thomas (1966)	growth rate	1.5666e-05	8.74394040132082e-06	301.351454731853	300.65	8.91206532189342e-06
Gyrodinium uncatenum strain GYRO	Anderson (1985)	growth rate	3.38252518197e-05	5.14898832019342e-06	294.038259468368	300.65	5.242e-06
Heterocapsa rotundata	Throndsen (1976)	growth rate	3.56442371909e-05	3.10178373905483e-06	296.589708723237	300.65	1.82407093855255e-05
Heteromastix pyriformis	Throndsen (1976)	growth rate	3.61461842199e-05	8.26802121543265e-07	295.802326975364	300.65	1.85767175924121e-05
Karenia brevis strain APA	McKay et al. (2006)	growth rate	1.32987938379e-05	1.5743347839972e-06	296.187043944812	300.65	2.52244847376968e-06
Leonella granifera strain GeoB*39	Meier et al. (2004)	growth rate	0.000105851	3.80114033569934e-06	294.665856783691	300.65	4.51426382582388e-06
Leonella granifera	Meier et al. (2004)	growth rate	4.29799328536e-05	4.00624267335853e-06	296.1922400219	300.65	4.77831017821796e-06
Leptocylindrus danicus	Hulburt (1982)	growth rate	5.41581692586e-05	1.85669908249347e-05	299.356089806909	300.65	1.9899e-05
Mastigocladus laminosus strain NZ-86-m	Miyamoto et al. (1979)	growth rate	2.7608152144e-06	2.76071867800665e-06	324.570452623487	300.65	8.20215482380812e-06
Men. 5 (Diatom)	Hulburt (1982)	growth rate	0.0001228634	1.72243576400177e-05	293.629046166413	300.65	1.74702684423157e-05
Microcystis aeruginosa strain NRC-1	Krï¿½ger & Eloff (1978)	growth rate	0.0001195859	3.02591969485896e-06	292.366382129306	300.65	3.06858915120823e-06
Neoceratium fusus	Baek et al. (2008)	growth rate	0.3028610891	4.12227345683741e-06	288.297743579867	300.65	4.13124067659738e-06
Odontella mobiliensis	Hulburt (1982)	growth rate	4.9549e-05	1.51003867150282e-05	298.684118990143	300.65	1.61458026937546e-05
Olisthodiscus luteus clone OLMS	Tomas (1978)	growth rate	6.04961565669e-05	9.5831147161246e-06	290.530439998866	300.65	9.729e-06
Olisthodiscus luteus	Throndsen (1976)	growth rate	0.0007540222	2.7436462568795e-06	284.877219925717	300.65	9.81025559761905e-06
Peridinium sp. strain 1	Barker (1935)	growth rate	2.74039418903e-05	1.46564915498672e-06	294.173422853953	300.65	7.07368510623629e-06
Peridinium sp.	Barker (1935)	growth rate	2.86997163716e-05	1.49980763089174e-06	294.026923360667	300.65	7.059e-06
Pernambugia tuberosa strain GeoB*74	Meier et al. (2004)	growth rate	1.25007658923e-05	3.10596969826356e-06	297.44697981818	300.65	3.83841232832833e-06
Phaeodactylum tricornutum clone Pet Pd	Fawley (1984)	growth rate	2.48133074652e-05	7.97483391719723e-06	299.466313023469	300.65	1.71240919757625e-05
Phaeodactylum tricornutum	Ryther (1954)	growth rate	1.13571959246e-05	9.29532663419778e-07	292.635195145103	300.65	3.94492680183447e-06
Planktothrix agardhii	van Liere (1979)	growth rate	7.11134923298e-06	7.08531187710808e-06	308.565587871547	300.65	8.50361265764742e-06
Pleurochrysis carterae	Blankley & Lewin (1976)	growth rate	9.85736548787e-06	1.2663133544012e-06	296.622462147237	300.65	3.783e-06
Proboscia inermis	Boyd et al. (2013)	growth rate	1.25340845753e-05	1.74583831777464e-28	279.598497067173	300.65	3.776e-06
Prochlorococcus marinus eMED4	Johnson et al. (2006)	growth rate	1.19118680592e-05	3.67694260214233e-06	298.93998653423	300.65	5.4724218953602e-06
Prochlorococcus marinus strain MIT9215 (clade 1)	Johnson (2006)	growth rate	3.00190874619e-05	5.37893529291362e-06	295.930241894167	300.65	5.40190175954091e-06
Prochlorococcus marinus strain MIT9215 (clade 1)	Johnson et al. (2006)	growth rate	2.86776417312e-05	5.39678607307659e-06	296.036233339834	300.65	5.41729653459327e-06
Prochlorococcus marinus strain MIT9312 (clade 1)	Johnson (2006)	growth rate	9.8462268588e-06	6.26256316435218e-06	301.310638663029	300.65	7.21935649961648e-06
Prochlorococcus marinus strain MIT9312 (clade 1)	Johnson et al. (2006)	growth rate	9.8572013735e-06	6.2622409159158e-06	301.30331325089	300.65	7.23474729940905e-06
Prochlorococcus marinus strain MIT9313	Zinser et al. (2007)	growth rate	6.58522317331e-06	5.29217708559431e-06	302.713981445312	300.65	5.35914884401285e-06
Prochlorococcus marinus strain MIT9515 (clade 2)	Johnson (2006)	growth rate	1.2003549495e-05	3.70744895630959e-06	298.932971619065	300.65	5.49866473110232e-06
Prochlorococcus marinus strain NATL2A	Zinser et al. (2007)	growth rate	1.19413112934e-05	3.88579186610865e-06	299.048068758013	300.65	5.5338883732988e-06
Prorocentrum minimum	Grzebyk & Berland (1996)	growth rate	1.15111944316e-05	7.07888896566407e-06	301.405908680502	300.65	8.5116112544527e-06
Prorocentrum minimum	Grzebyk and Berland (1996)	growth rate	1.15436335009e-05	7.05622176525706e-06	301.384534575095	300.65	8.5051951910152e-06
Pseudo-nitzschia turgiduloides	Fiala & Oriol (1990)	growth rate	0.014852288	6.9905621957335e-09	277.276547528979	300.65	5.72956292052452e-06
Pseudopedinella pyriformis	Throndsen (1976)	growth rate	7.15786803769e-05	6.52755316215335e-07	290.577212307755	300.65	1.40423090541922e-05
Pyrodinium bahamense var. compressum	Usup et al. (1994)	growth rate	2.90647645246e-06	2.83539076857186e-06	306.716800913153	300.65	3.08230903331221e-06
Pyrodinium bahamense var. compressum strain PbSA01	Usup et al. (1994)	growth rate	2.8971571923e-06	2.83071060929274e-06	306.774596650117	300.65	3.05794092590873e-06
Rhizosolenia fragilissimus	Ignatiades & Smayda (1970)	growth rate	0.0313536136	7.13538586242286e-06	282.662722740135	300.65	8.69851486899975e-06
Rhizosolenia setigera	Hulburt (1982)	growth rate	2.45012315477e-05	8.705056286012e-09	288.297859832696	300.65	6.495e-06
Rhizosolenia setigera	Hulburt (1982)	growth rate	0.0021178188	1.11820347057538e-05	289.619096068557	300.65	1.419990057628e-05
Scrippsiella trochoidea strain ScrpMxB	Binder & Anderson (1987)	growth rate	7.05711518287e-06	1.70522186884095e-09	295.669200155444	300.65	5.59451057464785e-06
Skeletonema marinoionohrnii complex	Kaeriyama et al. (2011)	growth rate	4.05533737422e-05	1.85387318730326e-05	299.175771622128	300.65	1.85680517261275e-05
Skeletonema tropicum clone S. trop.	Hulburt & Guillard (1968)	growth rate	1.5996420943	1.86745549759951e-05	288.920424540648	300.65	1.8683170964027e-05
Skeletonema tropicum clone fall	Hulburt (1982)	growth rate	76.7665612858	1.65851095774743e-05	287.240385285961	300.65	1.65988495535377e-05
Synechococcus sp. strain UV-005, PCC 6311	Krï¿½ger & Eloff (1978)	growth rate	0.002960254	3.5843323253271e-06	289.221722661106	300.65	3.58692996929353e-06
Thalassiosira pseudonana strain CCMP1011, STX97	Boyd et al. (2013)	growth rate	2.13868460095e-05	6.38369481828542e-06	299.544600361409	300.65	1.37492695067835e-05
Thalassiosira pseudonana strain CCMP1012, SWAN1	Boyd et al. (2013)	growth rate	4.19641785103e-05	7.88110570024317e-06	298.169421079425	300.65	1.71760536796314e-05
Thalassiosira pseudonana strain CCMP1013, W	Boyd et al. (2013)	growth rate	2.6304e-05	2.2364730519125e-05	302.657070412497	300.65	2.23890688803709e-05
Thalassiosira pseudonana strain CCMP1014, FCRG66	Boyd et al. (2013)	growth rate	1.95838900144e-05	1.88736102381531e-05	303.810143252036	300.65	1.9035944377193e-05
Thalassiosira pseudonana strain CCMP1015, ARC5	Boyd et al. (2013)	growth rate	1.95797161232e-05	1.8293198780288e-05	304.114509119721	300.65	1.83244220689034e-05
Thalassiosira pseudonana	Thompson et al. (1992)	growth rate	5.2746e-05	2.00576529497879e-05	298.463205432727	300.65	2.09368988677663e-05
Thalassiosira rotula strain CCAP1085_21	Boyd et al. (2013)	growth rate	0.0001472882	6.18890594006044e-06	286.733428501875	300.65	8.97839048805997e-06
Thalassiosira rotula strain CCMP3096	Boyd et al. (2013)	growth rate	0.000119259	6.19504321250019e-06	285.456439997476	300.65	8.10412537176608e-06
Thalassiosira rotula strain CCMP3264	Boyd et al. (2013)	growth rate	0.0013945726	6.9447572056724e-06	282.991301988537	300.65	9.27428104234301e-06
Thalassiosira rotula strain JpnTR18	Boyd et al. (2013)	growth rate	0.0001952353	5.7390481004215e-06	282.412377732262	300.65	7.44632596179886e-06
Thalassiosira rotula	Baars (1981)	growth rate	0.0992503462	8.23823878326068e-06	279.745106101489	300.65	1.75083133626483e-05
Trichodesmium erythraeum strain 21_75	Boyd et al. (2013)	growth rate	1.58613785402e-05	3.03002540801713e-06	297.652508225774	300.65	3.10353680484264e-06
Trichodesmium erythraeum strain KO4_20	Boyd et al. (2013)	growth rate	1.10931997103e-05	3.53634756602128e-06	299.074651913254	300.65	3.62462611037678e-06
Trichodesmium radians strain H94	Chappell & Webb (2010)	growth rate	2.62645270215e-05	3.98466405487243e-06	298.661417605787	300.65	4.24985355464046e-06
Akashiwo sanguinea strain BWA	Boyd et al. (2013)	growth rate	8.78466146571e-06	2.46733256695249e-06	300.30827566904	303.15	4.219e-06
Akashiwo sanguinea strain GBB	Boyd et al. (2013)	growth rate	8.51927929208e-06	3.6032854180654e-06	302.229177831074	303.15	4.9636527206162e-06
Akashiwo sanguinea strain RMB	Boyd et al. (2013)	growth rate	8.17360418723e-06	2.22259125247156e-06	300.976806503017	303.15	4.28678850105648e-06
Akashiwo sanguinea strain YRB	Boyd et al. (2013)	growth rate	5.41466055342e-06	3.77070905713006e-06	304.168563453147	303.15	4.71375318221439e-06
Alexandrium minutum	Cannon (1993)	growth rate	0.0588826542	3.18271983131437e-06	286.476433405059	303.15	3.48128133597582e-06
Alexandrium ostenfeldii clone LF-37	Jensen & Moestrup (1997)	growth rate	3.01567085824e-05	3.47288351201652e-07	293.992188526973	303.15	2.54571130940597e-06
Alexandrium ostenfeldii clone LF-37	Jensen and Moestrup (1997)	growth rate	2.92055445974e-05	3.96525731941529e-07	293.958950173822	303.15	2.50084353143641e-06
Alexandrium tamarense clone GTMP	Watras et al. (1982)	growth rate	0.3935672242	2.45333639081207e-06	283.307330522069	303.15	4.048e-06
Amphidinium klebsii	Morton et al. (1992)	growth rate	1.2307e-05	3.62897499715763e-06	301.654307873491	303.15	4.3811276712846e-06
Amphiprora sp.	Hulburt (1982)	growth rate	2.3388665239e-05	9.06023605373473e-06	302.007900559563	303.15	1.01726828024596e-05
Apedinella radians	Throndsen (1976)	growth rate	0.041657354	1.18256963068757e-05	284.645649329597	303.15	1.38599469061241e-05
Biceratium furca	Baek et al. (2008)	growth rate	0.1149475216	4.67357778596572e-06	288.693237778193	303.15	5.57268660574928e-06
Ceratium furca	Baek et al. (2008)	growth rate	0.0050971139	4.51118356652383e-06	289.769148351746	303.15	6.04766037198776e-06
Chaetoceros didymus	Hulburt (1982)	growth rate	872181.671842	1.31712354052412e-05	286.520467682042	303.15	1.57321919502818e-05
Chaetoceros gracilis	Thompson et al. (1992)	growth rate	0.0003007677	1.22930190447985e-05	291.622755644089	303.15	1.86132231872435e-05
Chaetoceros lorenzianus clone Bushehr	Hulburt (1982)	growth rate	3.42196696739e-05	1.37534031092134e-05	302.421280727944	303.15	1.94180573864272e-05
Chaetoceros sp.	Thomas (1966)	growth rate	0.0043182743	4.07953198928328e-05	292.353882035841	303.15	4.08934859209524e-05
Chattonella marina	Kahn (1998)	growth rate	2.4226e-05	3.35896708178569e-06	296.692872875611	303.15	4.96509194199943e-06
Chlamydomonas alpina	Seaburg et al. (1981)	growth rate	0.0004529891	3.51834120801089e-09	287.640465423888	303.15	1.0833e-05
Chlamydomonas reinhardtii	McCombie (1960)	growth rate	5.17692114301e-05	6.70094070150927e-07	289.979528490285	303.15	8.20100610777774e-07
Chlamydomonas subcaudata	Seaburg et al. (1981)	growth rate	5.77870520546e-05	2.51798969849524e-10	288.322572747539	303.15	1.12556324991427e-05
Chlorella MFD1	James et al. (1989)	growth rate	5.26058354166e-06	1.75926349814685e-06	299.358216473205	303.15	2.13586292751564e-06
Chlorella sorokiniana strain CCAP 211/8K, 7-11-05	Sorokin (1960)	growth rate	7.82667806047e-05	5.77505592302026e-05	305.611553096462	303.15	8.01894279439573e-05
Chlorella sp. strain MFD-1	James et al. (1989)	growth rate	3.49589824888e-06	1.23616634006842e-06	299.855705074108	303.15	1.50626088272412e-06
Chrysochromulina polylepis strain B3	Edvardsen (1992)	growth rate	6.11812532e-05	2.05789598114123e-07	291.556259361281	303.15	1.00283288531623e-05
Chrysochromulina polylepis strain B4	Edvardsen (1992)	growth rate	3.83114902538e-05	1.24139129575963e-07	292.641339159628	303.15	8.60334734817582e-06
Chrysochromulina polylepis strain K	Edvardsen (1992)	growth rate	8.22376911051e-05	3.53825864322412e-06	292.357669586682	303.15	9.92215812439567e-06
Cochlodinium polykrikoides strain KG8-ND14	Yamatogi (2005)	growth rate	1.54509140993e-05	5.94439895694697e-06	301.624340229139	303.15	6.42953665049875e-06
[truncated: 95 more rows]
